# Supplementary material for: A base-free hydroxylaminolysis protocol promoted by ZnO in deep eutectic solvents
Source: Royal Society of Chemistry journal article supplement (doi:10.1039/d3gc00485f), 2023-01-01

## SUPPLEMENTARY INFORMATION

# A base-free hydroxylaminolysis protocol promoted by ZnO in deep eutectic solvents

Xinjie Liang, Bingqing Lv, Shitao Sun, Zhixuan Wu, Bin Lin, Xuefei Bao\* and Guoliang Chen\*

Key Laboratory of Key Laboratory of Structure-Based Drug Design & Discovery, Ministry of Education, Shenyang  
Pharmaceutical University, Shenyang 110016, China

\* Corresponding author: spucgl@163.com (GL Chen); bxf551@163.com (XF Bao)

| <b>Content</b>                                                                           | <b>Page</b> |
|------------------------------------------------------------------------------------------|-------------|
| General consideration                                                                    | 2           |
| Synthesis procedures                                                                     | 3           |
| Computational methods                                                                    | 5           |
| Spectroscopic characterization of all the synthesized compounds                          | 10          |
| HPLC spectrums                                                                           | 14          |
| XRD spectrum                                                                             | 19          |
| <sup>1</sup> H NMR, <sup>13</sup> C NMR spectrum and HRMS or MS(ESI) of target compounds | 20          |

## General Reaction Considerations

All reactions were performed under regular conditions unless otherwise stated. All reactions were magnetically stirred and elevated temperatures were reported as the temperature of the surrounding oil bath. Solvent evaporation was conducted by rotary evaporation at the appropriate temperature and pressure. All normal phase flash column chromatography was conducted using silica gel 200-300 mesh. All reported yields reflect spectroscopically (<sup>1</sup>H-NMR) pure material unless otherwise stated.

## Materials

Unless stated otherwise, all starting materials, reagents, and solvents were purchased from commercial suppliers and were used without further purification.

## Analysis

Unless otherwise stated, all NMR data were acquired at ambient temperature. NMR solvents, dimethylsulfoxide-*d*<sub>6</sub> (DMSO-*d*<sub>6</sub>), were purchased from Shanghai Meryer Chemical Tech Co Ltd. NMR spectra were recorded on Bruker Ascend 600 or Bruker AVIII 400. High-resolution mass spectrometry (HRMS) was conducted on an Agilent Accurate-Mass Q-TOF 6350 and LC-MS-ESI was recorded in Waters Quattro micro-API. Melting points were determined with a X-4 apparatus and were uncorrected.

### **General procedure for the preparation of DESs.**

A mixture of hydrogen-bond donor and hydrogen-bond acceptor, with the previously specified molar ratio, was added in a round bottom flask under an inert atmosphere. The mixture was stirred for 30 minutes in a T range between 65 and 80 °C obtaining the corresponding DES.

### **General procedure for the synthesis of compound 2a to 2k, 2t-S, 2t-R from carboxylic esters**

The carboxylic esters (1 mmol) and ZnO (1 mmol) was added to DES (ChCl : glycerol = 1 : 2) solvent (2 g) and stirred for 10 min. The hydroxylamine (50% aqueous solution) 2 mL was added slowly to the stirring solution at room temperature. Then the solution was allowed to stir for 12-36 h at room temperature. The crude mixture was diluted with an equal volume of water and filtered to obtain a complex of the product-zinc oxide. The complex was added to ethanol 20 mL containing oxalic acid (2 mmol.), stirred for 2 h, and filtered. The filtrate was evaporated and treated with water to obtain the target product. The crude products were purified by triturating in petroleum ether or diethyl ether.

### **General procedure for the synthesis of compound 2l to 2o from carboxylic esters**

The carboxylic esters (1 mmol) and ZnO (1 mmol) was added to DES (ChCl : glycerol = 1 : 2) solvent (2 g) and stirred for 10 min. The hydroxylamine (50% aqueous solution) 2 mL was added slowly to the stirring solution at room temperature. Then the solution was allowed to stir for 12-36 h at room temperature. The crude mixture was diluted with an equal volume of water and filtered to obtain a complex of the product-zinc oxide. The complex was added to ethanol 20 mL containing oxalic acid (2 mmol.), stirred for 2 h, and filtered. The filtrate was evaporated and treated with water to obtain the target product without further purification.

### **General procedure for the synthesis of compound 2p to 2r from carboxylic esters**

The carboxylic esters (0.5 mmol) and ZnO (1 mmol) was added to DES (ChCl : glycerol = 1 : 2) solvent (2 g) and stirred for 10 min. The hydroxylamine (50% aqueous solution) 2 mL was added slowly to the stirring solution at room temperature. Then the solution was allowed to stir for 24-36 h at 45 °C. The crude mixture was diluted with an equal volume of water and filtered to obtain a complex of the product-zinc oxide. The complex was added to ethanol 20 mL containing oxalic acid (2 mmol.), stirred for 2 h, and filtered. The filtrate was evaporated and treated with water to obtain the target product. The crude products were purified by triturating in petroleum ether or diethyl ether.

### **The procedure for the synthesis of compound 2n at gram-scale.**

The carboxylic esters (1 g, 3.8 mmol) and ZnO (0.62 g, 7.6 mmol) was added to DES (ChCl : glycerol = 1 : 2) solvent (20 g) and stirred for 10 min. The hydroxylamine (50% aqueous solution) 20 mL was added slowly to the stirring solution at room temperature. Then the solution was allowed to stir

for 36 h at room temperature. The crude mixture was diluted with an equal volume of water and filtered to obtain a complex of the product-zinc oxide. The complex was added to ethanol 20 mL containing oxalic acid (2 mmol.), stirred for 2 h, and filtered. The filter cake needs to be treated again according to the same process. The filtrate was evaporated and treated with water to obtain the target product without further purification.

**The procedure for the synthesis of compound 2t-S according to Harris's method.**

1,8-Diazabicyclo[5.4.0]undec-7-ene (0.46 g, 3 mmol) was added to a solution of **2t** (0.28 g, 1 mmol) in methanol (1 mL). The resulting solution was stirred at room temperature and hydroxylamine in aqueous solution 50% (0.60 ml, 10.14 mmol) was added. After 4 h the reaction was stopped and purified by column chromatography to afford **2t-S** as an off-white solid.

## Computational Methods

All computations were performed using density functional theory (DFT)<sup>1</sup> implemented in Gaussian 09 suite of program.<sup>2</sup> Geometry optimizations were performed in the gas phase with B3LYP<sup>3,4</sup> levels of theory and 6-31G(d) basis set was used for the geometry optimizations. Vibrational frequency calculations were conducted at the same level, to derive the thermochemistry correction term ( $G - E$ ) as well as to confirm the stationary point was the minima point on the potential energy surface (no imaginary frequency). After geometry optimizations, the energies were re-evaluated under CAM-B3LYP<sup>5</sup> level with 6-311+G(d,p) for optimized structures. Solvation energy correction was carried out at the same level of the single point energy calculations using PCM continuum solvation model<sup>6</sup> (solvent = ethanol), and solution phase electronic energy ( $E_{\text{Sol}}$ ) was evaluated. Final solution phase Gibbs free energy ( $G_{\text{Sol}}$ ) were computed as follows:

$$G_{\text{Sol}} = E_{\text{Sol}} + (G - E)$$

$$\Delta G_{\text{Sol}} = \Sigma G_{\text{Sol}} \text{ for products} - \Sigma G_{\text{Sol}} \text{ for reactants}$$

### B3LYP Geometries for All the Optimized Compounds

#### 1a

$E_{\text{Sol}} = -1272.420265$  hartree

$G_{\text{Sol}} = -1,272.291849$  hartree

Number of Imaginary Frequencies: 0

|   |          |          |          |
|---|----------|----------|----------|
| C | 2.31111  | -1.58241 | -0.00004 |
| C | 3.34860  | -0.64691 | 0.00003  |
| C | 3.05874  | 0.72021  | 0.00006  |
| C | 1.73445  | 1.15050  | 0.00005  |
| C | 0.69084  | 0.21503  | -0.00001 |
| C | 0.98408  | -1.15580 | -0.00007 |
| H | 2.53650  | -2.64537 | -0.00007 |
| H | 4.38223  | -0.98300 | 0.00005  |
| H | 3.86513  | 1.44840  | 0.00011  |
| H | 1.48451  | 2.20637  | 0.00008  |
| H | 0.17381  | -1.87622 | -0.00013 |
| C | -0.70706 | 0.73458  | -0.00003 |
| O | -1.00035 | 1.91497  | -0.00004 |
| O | -1.62851 | -0.25562 | -0.00003 |
| C | -3.00915 | 0.17035  | -0.00005 |
| H | -3.18571 | 0.79321  | 0.88276  |
| H | -3.18572 | 0.79296  | -0.88303 |
| C | -3.87111 | -1.07822 | 0.00012  |
| H | -4.93021 | -0.79829 | 0.00003  |
| H | -3.67628 | -1.68851 | -0.88767 |
| H | -3.67634 | -1.68821 | 0.88811  |

#### 1a-1

$E_{\text{Sol}} = -1272.420265$  hartree

$G_{\text{Sol}} = -1,272.291849$  hartree

Number of Imaginary Frequencies: 0

|    |          |          |          |
|----|----------|----------|----------|
| C  | -3.13243 | -1.81872 | 0.78679  |
| C  | -3.05250 | -2.55421 | -0.40033 |
| C  | -2.06565 | -2.24295 | -1.33552 |
| C  | -1.16521 | -1.20329 | -1.08705 |
| C  | -1.23707 | -0.46519 | 0.09650  |
| C  | -2.23285 | -0.78211 | 1.03046  |
| H  | -3.89707 | -2.05776 | 1.52403  |
| H  | -3.75167 | -3.36665 | -0.58960 |
| H  | -1.99003 | -2.81331 | -2.25917 |
| H  | -0.38838 | -0.95080 | -1.80078 |
| H  | -2.28076 | -0.20966 | 1.95130  |
| C  | -0.27462 | 0.72146  | 0.34069  |
| O  | 0.68711  | 0.83299  | -0.57321 |
| O  | -1.09380 | 1.92526  | 0.44128  |
| C  | -1.53462 | 2.43564  | -0.80345 |
| H  | -0.67745 | 2.59962  | -1.46716 |
| H  | -2.20504 | 1.71566  | -1.30214 |
| C  | -2.27497 | 3.73885  | -0.53351 |
| H  | -2.63893 | 4.17849  | -1.47087 |
| H  | -3.13359 | 3.56840  | 0.12618  |
| H  | -1.61179 | 4.46213  | -0.04557 |
| N  | 0.18959  | 0.66328  | 1.78749  |
| H  | 0.45218  | 1.63160  | 1.97941  |
| O  | 1.48757  | 0.02060  | 1.85138  |
| H  | 1.32875  | -0.94888 | 1.70056  |
| Zn | 2.24289  | -0.26901 | -0.28083 |
| O  | 1.79293  | -2.03016 | 0.23699  |
| O  | 3.87614  | 0.33153  | -0.83158 |

### 1a-2

$E_{\text{Sol}} = -1272.420265$  hartree

$G_{\text{Sol}} = -1,272.291849$  hartree

Number of Imaginary Frequencies: 0

|   |         |          |          |
|---|---------|----------|----------|
| C | 2.64118 | 0.61216  | -1.26430 |
| C | 3.37676 | 0.81310  | -0.09063 |
| C | 2.78394 | 0.53895  | 1.14359  |
| C | 1.46878 | 0.06926  | 1.20059  |
| C | 0.72524 | -0.12852 | 0.03513  |
| C | 1.32759 | 0.14680  | -1.19934 |
| H | 3.09808 | 0.81791  | -2.23198 |
| H | 4.40282 | 1.17532  | -0.14082 |
| H | 3.34981 | 0.68786  | 2.06302  |
| H | 0.97736 | -0.16639 | 2.14045  |
| H | 0.75024 | -0.02272 | -2.10303 |

|   |          |          |          |
|---|----------|----------|----------|
| C | -0.73924 | -0.61873 | 0.14964  |
| O | -1.11569 | -0.95031 | 1.34414  |
| O | -1.56333 | 0.46949  | -0.51173 |
| C | -1.94942 | 1.48642  | 0.37611  |
| H | -2.19593 | 1.04954  | 1.35315  |
| H | -1.12751 | 2.21139  | 0.54086  |
| C | -3.15449 | 2.21456  | -0.21310 |
| H | -3.48035 | 3.03578  | 0.44085  |
| H | -2.91348 | 2.63427  | -1.19769 |
| H | -3.99209 | 1.51890  | -0.34261 |
| N | -0.97265 | -1.71323 | -0.89564 |
| H | -1.98662 | -1.63540 | -1.04003 |
| O | -0.81388 | -2.95532 | -0.18001 |
| H | -1.01257 | -2.62876 | 0.74202  |

## 2a

$E_{\text{sol}} = -1272.420265$  hartree

$G_{\text{sol}} = -1,272.291849$  hartree

Number of Imaginary Frequencies: 0

|   |          |          |          |
|---|----------|----------|----------|
| C | 2.18700  | -1.31985 | 0.12886  |
| C | 2.99831  | -0.20155 | -0.07653 |
| C | 2.42352  | 1.06601  | -0.20117 |
| C | 1.04090  | 1.21581  | -0.12822 |
| C | 0.22151  | 0.09467  | 0.06123  |
| C | 0.80248  | -1.17471 | 0.20045  |
| H | 2.63309  | -2.30355 | 0.24533  |
| H | 4.07747  | -0.31676 | -0.13042 |
| H | 3.05425  | 1.93745  | -0.35295 |
| H | 0.57469  | 2.19176  | -0.21516 |
| H | 0.17737  | -2.04078 | 0.39892  |
| C | -1.24983 | 0.31217  | 0.11293  |
| O | -1.78154 | 1.39543  | 0.36722  |
| N | -2.04425 | -0.79323 | -0.10609 |
| H | -1.76961 | -1.44966 | -0.82848 |
| O | -3.41387 | -0.50593 | -0.23206 |
| H | -3.41751 | 0.46281  | -0.04112 |

## ethanol

$E_{\text{sol}} = -1272.420265$  hartree

$G_{\text{sol}} = -1,272.291849$  hartree

Number of Imaginary Frequencies: 0

|   |         |          |          |
|---|---------|----------|----------|
| O | 1.15046 | -0.39972 | -0.00001 |
| C | 0.08705 | 0.54883  | -0.00008 |
| H | 0.13852 | 1.20105  | 0.88744  |

|   |          |          |          |
|---|----------|----------|----------|
| H | 0.13843  | 1.20081  | -0.88778 |
| C | -1.22269 | -0.22199 | 0.00009  |
| H | -2.07541 | 0.46601  | 0.00003  |
| H | -1.28898 | -0.86085 | -0.88670 |
| H | -1.28890 | -0.86059 | 0.88707  |
| H | 1.98653  | 0.09035  | -0.00007 |

ZnO<sub>2</sub>

E<sub>Sol</sub> = -1272.420265 hartree

G<sub>Sol</sub> = -1,272.291849 hartree

Number of Imaginary Frequencies: 0

|    |         |         |          |
|----|---------|---------|----------|
| Zn | 0.00000 | 0.00000 | 0.00000  |
| O  | 0.00000 | 0.00000 | 1.70656  |
| O  | 0.00000 | 0.00000 | -1.70656 |

hydroxylamine

E<sub>Sol</sub> = -1272.420265 hartree

G<sub>Sol</sub> = -1,272.291849 hartree

Number of Imaginary Frequencies: 0

|   |          |          |          |
|---|----------|----------|----------|
| N | -0.69132 | -0.00050 | 0.15726  |
| H | -1.03926 | 0.81199  | -0.35714 |
| H | -1.03973 | -0.80958 | -0.36220 |
| O | 0.72556  | 0.00049  | -0.14111 |
| H | 1.11373  | -0.00284 | 0.74735  |

## Reference

- (1) Parr, R. G.; Weitao, Y. *Density-Functional Theory of Atoms and Molecules*; Oxford University Press, 1995. <https://doi.org/10.1093/oso/9780195092769.001.0001>.
- (2) Gaussian 09, Revision D.01, M. J. Frisch, G. W. Trucks, H. B. Schlegel, G. E. Scuseria, M. A. Robb, J. R. Cheeseman, G. Scalmani, V. Barone, B. Mennucci, G. A. Petersson, H. Nakatsuji, M. Caricato, X. Li, H. P. Hratchian, A. F. Izmaylov, J. Bloino, G. Zheng, J. L. Sonnenberg, M. Hada, M. Ehara, K. Toyota, R. Fukuda, J. Hasegawa, M. Ishida, T. Nakajima, Y. Honda, O. Kitao, H. Nakai, T. Vreven, J. A. Montgomery, Jr., J. E. Peralta, F. Ogliaro, M. Bearpark, J. J. Heyd, E. Brothers, K. N. Kudin, V. N. Staroverov, T. Keith, R. Kobayashi, J. Normand, K. Raghavachari, A. Rendell, J. C. Burant, S. S. Iyengar, J. Tomasi, M. Cossi, N. Rega, J. M. Millam, M. Klene, J. E. Knox, J. B. Cross, V. Bakken, C. Adamo, J. Jaramillo, R. Gomperts, R. E. Stratmann, O. Yazyev, A. J. Austin, R. Cammi, C. Pomelli, J. W. Ochterski, R. L. Martin, K. Morokuma, V. G. Zakrzewski, G. A. Voth, P. Salvador, J. J. Dannenberg, S. Dapprich, A. D. Daniels, O. Farkas, J. B. Foresman, J. V. Ortiz, J. Cioslowski, and D. J. Fox, Gaussian, Inc., Wallingford CT, 2013.
- (3) Lee, C.; Yang, W.; Parr, R. G. Development of the Colle-Salvetti Correlation-Energy Formula into a Functional of the Electron Density. *Phys. Rev. B* **1988**, *37* (2), 785–789. <https://doi.org/10.1103/PhysRevB.37.785>.
- (4) Becke, A. D. Density-functional Thermochemistry. III. The Role of Exact Exchange. *J. Chem. Phys.* **1993**, *98* (7), 5648–5652. <https://doi.org/10.1063/1.464913>.



- (5) Yanai, T.; Tew, D. P.; Handy, N. C. A New Hybrid Exchange–Correlation Functional Using the Coulomb-Attenuating Method (CAM-B3LYP). *Chem. Phys. Lett.* **2004**, *393* (1–3), 51–57. <https://doi.org/10.1016/j.cplett.2004.06.011>.
- (6) Tomasi, J.; Mennucci, B.; Cammi, R. Quantum Mechanical Continuum Solvation Models. *Chem. Rev.* **2005**, *105* (8), 2999–3094. <https://doi.org/10.1021/cr9904009>.

## Hydroxamic Acids

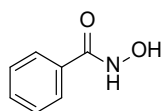

Pinkish solid;  $^1\text{H}$  NMR (400 MHz,  $\text{DMSO-}d_6$ )  $\delta$  11.20 (s, 1H), 9.03 (s, 1H), 7.79-7.71 (m, 2H), 7.55-7.48 (m, 1H), 7.48-7.41 (m, 2H).  $^{13}\text{C}$  NMR (101 MHz,  $\text{DMSO-}d_6$ )  $\delta$  164.64, 133.25, 131.58, 128.84, 127.31. HRMS (ESI):  $m/z$   $[\text{M-H}]^-$  calculated for  $\text{C}_7\text{H}_6\text{O}_2$ : 136.0404; found: 136.0412. m.p. 104-106 °C.

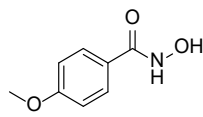

Light brown solid,  $^1\text{H}$  NMR (400 MHz,  $\text{DMSO-}d_6$ )  $\delta$  11.05 (s, 1H), 8.88 (s, 1H), 7.73 (d,  $J = 8.8$  Hz, 2H), 6.98 (d,  $J = 8.8$  Hz, 2H), 3.80 (s, 3H).  $^{13}\text{C}$  NMR (101 MHz,  $\text{DMSO-}d_6$ )  $\delta$  164.52, 161.97, 129.10, 125.42, 114.09, 55.79. HRMS (ESI):  $m/z$   $[\text{M-H}]^-$  calculated for  $\text{C}_8\text{H}_8\text{NO}_3$ : 166.0510; found: 166.0526. m.p. 140-143 °C.

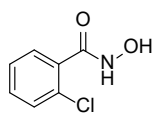

White solid,  $^1\text{H}$  NMR (400 MHz,  $\text{DMSO-}d_6$ )  $\delta$  10.95 (s, 1H), 9.21 (s, 1H), 7.54-7.42 (m, 2H), 7.42-7.35 (m, 2H).  $^{13}\text{C}$  NMR (101 MHz,  $\text{DMSO-}d_6$ )  $\delta$  163.74, 135.10, 131.55, 131.08, 130.15, 129.82, 127.57. HRMS (ESI):  $m/z$   $[\text{M-H}]^-$  calculated for  $\text{C}_7\text{H}_5\text{ClNO}_2$ : 170.0014; found: 170.0012. m.p. 120-122 °C.

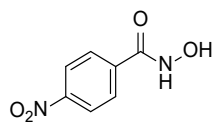

Yellowish solid,  $^1\text{H}$  NMR (400 MHz,  $\text{DMSO-}d_6$ )  $\delta$  11.52 (s, 1H), 9.31 (s, 1H), 8.30 (d,  $J = 8.3$  Hz, 2H), 7.99 (d,  $J = 8.3$  Hz, 2H).  $^{13}\text{C}$  NMR (101 MHz,  $\text{DMSO-}d_6$ )  $\delta$  162.78, 149.44, 138.99, 128.87, 124.09. HRMS (ESI):  $m/z$   $[\text{M-H}]^-$  calculated for  $\text{C}_7\text{H}_5\text{N}_2\text{O}_4$ : 181.0255; found: 181.0256. m.p. 157-160 °C.

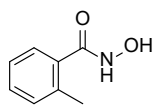

White solid,  $^1\text{H}$  NMR (400 MHz,  $\text{DMSO-}d_6$ )  $\delta$  10.79 (s, 1H), 9.01 (s, 1H), 7.35-7.31 (m, 1H), 7.28-7.15 (m, 3H), 2.33 (s, 3H).  $^{13}\text{C}$  NMR (101 MHz,  $\text{DMSO-}d_6$ )  $\delta$  166.62, 136.17, 135.19, 130.89, 129.96, 127.80, 125.96, 19.65. HRMS (ESI):  $m/z$   $[\text{M-H}]^-$  calculated for  $\text{C}_8\text{H}_8\text{NO}_2$ : 150.0561; found: 150.0546. m.p. 116-120 °C.

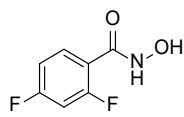

White solid,  $^1\text{H}$  NMR (600 MHz,  $\text{DMSO-}d_6$ )  $\delta$  11.00 (s, 1H), 9.24 (s, 1H), 7.62 (q,  $J = 7.8$  Hz, 1H), 7.38-7.32 (m, 1H), 7.20-7.14 (m, 1H).  $^{13}\text{C}$  NMR (151 MHz,  $\text{DMSO-}d_6$ )  $\delta$  164.51 (d,  $J = 12.5$  Hz), 162.86 (d,  $J = 12.0$  Hz), 160.91, 160.79 (d,  $J = 13.0$  Hz), 159.12 (d,  $J = 13.0$  Hz), 132.01 (d,  $J = 4.9$  Hz), 131.94 (d,  $J = 4.7$  Hz), 119.48 (d,  $J = 15.5$  Hz), 112.21 (d,  $J = 20.1$  Hz), 104.96 (t,  $J = 26.3$  Hz). HRMS (ESI):  $m/z$   $[\text{M-H}]^-$  calculated for  $\text{C}_7\text{H}_4\text{F}_2\text{NO}_2$ : 172.0216; found: 172.0222. m.p. 142-146 °C.

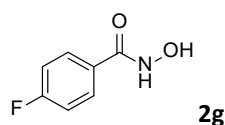

Synthesized by following general procedure providing the product as an off-white solid in 90.1 % yield;  $^1\text{H}$  NMR (600 MHz,  $\text{DMSO-}d_6$ )  $\delta$  11.24 (s, 1H), 9.06 (s, 1H), 7.90 – 7.77 (m, 2H), 7.38 – 7.23 (m, 2H).  $^{13}\text{C}$  NMR (151 MHz,  $\text{DMSO-}d_6$ )  $\delta$  164.98, 163.61, 163.34, 129.87, 129.81, 129.64, 115.81, 115.66. HRMS (ESI):  $m/z$   $[\text{M-H}]^-$  calculated for  $\text{C}_7\text{H}_5\text{FNO}_2$ : 154.0310; found: 154.0307. m.p. 153-156 °C.

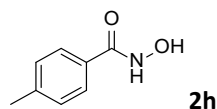

White solid,  $^1\text{H}$  NMR (400 MHz,  $\text{DMSO-}d_6$ )  $\delta$  11.14 (s, 1H), 8.97 (s, 1H), 7.65 (d,  $J = 8.2$  Hz, 2H), 7.25 (d,  $J = 7.9$  Hz, 2H), 2.34 (s, 3H).  $^{13}\text{C}$  NMR (101 MHz,  $\text{DMSO-}d_6$ )  $\delta$  164.69, 141.44, 130.44, 129.35, 127.32, 21.40. HRMS (ESI):  $m/z$   $[\text{M-H}]^-$  calculated for  $\text{C}_8\text{H}_8\text{NO}_2$ : 150.0561; found: 150.0595. m.p. 136-138 °C.

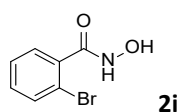

White solid,  $^1\text{H}$  NMR (400 MHz,  $\text{DMSO-}d_6$ )  $\delta$  10.93 (s, 1H), 9.20 (s, 1H), 7.66 (dd,  $J = 8.1, 1.4$  Hz, 1H), 7.48-7.33 (m, 3H).  $^{13}\text{C}$  NMR (101 MHz,  $\text{DMSO-}d_6$ )  $\delta$  164.60, 137.21, 133.28, 131.69, 129.84, 128.04, 120.21. HRMS (ESI):  $m/z$   $[\text{M-H}]^-$  calculated for  $\text{C}_7\text{H}_5\text{BrNO}_2$ : 213.9509, 215.9489; found: 213.9519, 215.9500. m.p. 161-164 °C.

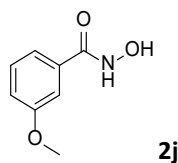

Light brown solid,  $^1\text{H}$  NMR (600 MHz,  $\text{DMSO-}d_6$ )  $\delta$  11.20 (s, 1H), 9.03 (s, 1H), 7.38-7.27 (m, 3H), 7.08 (dd,  $J = 7.9, 1.5$  Hz, 1H), 3.79 (s, 3H).  $^{13}\text{C}$  NMR (151 MHz,  $\text{DMSO-}d_6$ )  $\delta$  164.28, 159.52, 134.54, 129.93, 119.44, 117.34, 112.42, 55.60. HRMS (ESI):  $m/z$   $[\text{M-H}]^-$  calculated for  $\text{C}_8\text{H}_8\text{NO}_3$ : 166.0510; found: 166.0524. m.p. 86-88 °C.

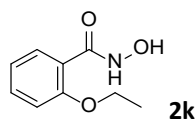

Light brown solid,  $^1\text{H}$  NMR (400 MHz,  $\text{DMSO-}d_6$ )  $\delta$  10.48 (s, 1H), 9.07 (s, 1H), 7.53 (d,  $J = 7.2$  Hz, 1H), 7.41 (t,  $J = 7.6$  Hz, 1H), 7.08 (d,  $J = 8.3$  Hz, 1H), 6.99 (t,  $J = 7.3$  Hz, 1H), 4.12 (q,  $J = 6.9$  Hz, 2H), 1.34 (t,  $J = 6.9$  Hz, 3H).  $^{13}\text{C}$  NMR (101 MHz,  $\text{DMSO-}d_6$ )  $\delta$  163.83, 156.30, 132.15, 130.28, 123.32, 120.76, 113.25, 64.43, 14.96. HRMS (ESI):  $m/z$   $[\text{M-H}]^-$  calculated for  $\text{C}_9\text{H}_{10}\text{NO}_3$ : 180.0666; found: 180.0659. m.p. 108-110 °C.

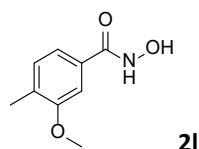

White solid,  $^1\text{H}$  NMR (400 MHz,  $\text{DMSO-}d_6$ )  $\delta$  11.14 (s, 1H), 8.95 (s, 1H), 7.30 (d,  $J = 1.6$  Hz, 1H), 7.26 (dd,  $J = 7.7, 1.6$  Hz, 1H), 7.19 (d,  $J = 7.7$  Hz, 1H), 3.82 (s, 3H), 2.17 (s, 3H).  $^{13}\text{C}$  NMR (101 MHz,  $\text{DMSO-}d_6$ )  $\delta$  164.58, 157.58, 132.15, 130.63, 129.57, 119.28, 109.07, 55.79, 16.44. HRMS (ESI):  $m/z$   $[\text{M-H}]^-$  calculated for  $\text{C}_9\text{H}_{10}\text{NO}_3$ : 180.0666; found: 180.0679. m.p. 147-150 °C.

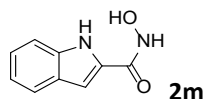

Light brown solid,  $^1\text{H}$  NMR (600 MHz,  $\text{DMSO-}d_6$ )  $\delta$  11.62 (s, 1H), 11.24 (s, 1H), 9.12 (s, 1H), 7.59 (d,  $J = 8.0$  Hz, 1H), 7.42 (d,  $J = 8.2$  Hz, 1H), 7.17 (t,  $J = 7.6$  Hz, 1H), 7.03 (t,  $J = 7.5$  Hz, 1H), 6.98 (s, 1H).  $^{13}\text{C}$  NMR (151 MHz,  $\text{DMSO-}d_6$ )  $\delta$  160.00, 136.69, 129.93, 127.45, 123.53, 121.78, 120.13, 112.61, 102.00. HRMS (ESI):  $m/z$   $[\text{M-H}]^-$  calculated for  $\text{C}_9\text{H}_7\text{N}_2\text{O}_2$ : 175.0513; found: 175.0515. m.p. 131-134 °C.

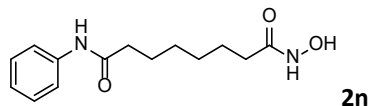

Synthesized by following general procedure providing the product as a white solid in 90.5% yield;  $^1\text{H}$  NMR (400 MHz,  $\text{DMSO-}d_6$ )  $\delta$  10.33 (s, 1H), 9.84 (s, 1H), 8.66 (s, 1H), 7.58 (d,  $J = 7.3$  Hz, 2H), 7.35-7.21 (m, 2H), 7.02 (t,  $J = 7.4$  Hz, 1H), 2.29 (t,  $J = 7.5$  Hz, 2H), 1.94 (t,  $J = 7.4$  Hz, 2H), 1.57 (p,  $J = 7.2$  Hz, 2H), 1.49 (p,  $J = 7.2$  Hz, 2H), 1.36-1.20 (m, 4H).  $^{13}\text{C}$  NMR (101 MHz,  $\text{DMSO-}d_6$ )  $\delta$  171.69, 169.57, 139.81, 129.10, 123.38, 119.49, 36.84, 32.71, 28.88, 25.49.

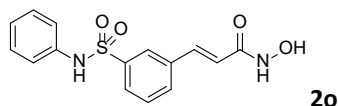

Yellowish solid,  $^1\text{H}$  NMR (400 MHz,  $\text{DMSO-}d_6$ )  $\delta$  10.81 (s, 1H), 10.32 (s, 1H), 9.12 (s, 1H), 7.91 (s, 1H), 7.78 (d,  $J = 7.9$  Hz, 1H), 7.70 (d,  $J = 8.1$  Hz, 1H), 7.57 (t,  $J = 7.8$  Hz, 1H), 7.46 (d,  $J = 15.9$  Hz, 1H), 7.26-7.19 (m, 2H), 7.14 – 7.07 (m, 2H), 7.06-7.01 (m, 1H), 6.50 (d,  $J = 15.8$  Hz, 1H).  $^{13}\text{C}$  NMR (101 MHz,  $\text{DMSO-}d_6$ )  $\delta$  162.51, 140.75, 137.98, 136.97, 136.36, 132.45, 130.49, 129.68, 127.53, 125.20, 124.80, 121.83, 120.83. HRMS (ESI):  $m/z$   $[\text{M-H}]^-$  calculated for  $\text{C}_{15}\text{H}_{13}\text{N}_2\text{O}_4\text{S}$ : 317.0602; found: 317.0620. m.p. 168-171 °C.

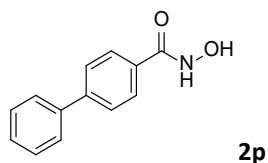

White solid,  $^1\text{H}$  NMR (600 MHz,  $\text{DMSO-}d_6$ )  $\delta$  11.28 (s, 1H), 9.07 (s, 1H), 7.86 (d,  $J = 8.0$  Hz, 2H), 7.76 (d,  $J = 8.0$  Hz, 2H), 7.72 (d,  $J = 7.6$  Hz, 2H), 7.49 (t,  $J = 7.6$  Hz, 2H), 7.41 (t,  $J = 7.4$  Hz, 1H).  $^{13}\text{C}$  NMR (151 MHz,  $\text{DMSO-}d_6$ )  $\delta$  164.27, 143.09, 139.57, 131.98, 129.43, 128.43, 127.91, 127.23, 127.00. HRMS (ESI):  $m/z$   $[\text{M-H}]^-$  calculated for  $\text{C}_{13}\text{H}_{10}\text{NO}_2$ : 212.0717; found: 212.0720. m.p. 186-190 °C.

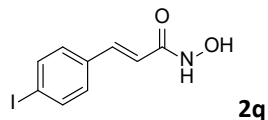

Light brown solid,  $^1\text{H}$  NMR (400 MHz,  $\text{DMSO-}d_6$ )  $\delta$  10.76 (s, 1H), 9.05 (s, 1H), 7.77 (d,  $J = 8.1$  Hz, 2H), 7.53-7.26 (m, 3H), 6.48 (d,  $J = 15.8$  Hz, 1H).  $^{13}\text{C}$  NMR (101 MHz,  $\text{DMSO-}d_6$ )  $\delta$  162.84, 138.22, 137.73, 134.91, 129.89, 120.39, 96.38. HRMS (ESI):  $m/z$   $[\text{M-H}]^-$  calculated for  $\text{C}_9\text{H}_7\text{INO}_2$ : 287.9527; found: 287.9534. m.p. 189-192 °C.

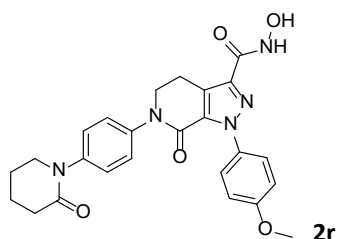

Off-white solid,  $^1\text{H}$  NMR (400 MHz,  $\text{DMSO-}d_6$ )  $\delta$  11.13 (s, 1H), 9.03 (s, 1H), 7.50 (d,  $J = 8.9$  Hz, 2H), 7.35 (d,  $J = 8.8$  Hz, 2H), 7.27 (d,  $J = 8.9$  Hz, 2H), 6.99 (d,  $J = 9.0$  Hz, 2H), 4.06 (t,  $J = 6.6$  Hz, 2H), 3.80 (s, 3H), 3.59 (t,  $J = 5.7$  Hz, 2H), 3.18 (t,  $J = 6.6$  Hz, 2H), 2.38 (t,  $J = 6.3$  Hz, 2H), 1.90-1.78 (m, 4H).  $^{13}\text{C}$  NMR (101 MHz,  $\text{DMSO-}d_6$ )  $\delta$  169.33, 166.61, 159.60, 157.05, 141.89, 140.73, 140.29, 133.10, 133.00, 127.24, 126.81, 126.50, 125.50, 113.87, 55.95, 51.38, 51.30, 33.06, 23.47, 21.36, 21.30. HRMS (ESI):  $m/z$  [ $\text{M-H}$ ] $^-$  calculated for  $\text{C}_{25}\text{H}_{24}\text{N}_5\text{O}_5$ : 474.1783; found: 474.1802. m.p. 133-136  $^\circ\text{C}$ .

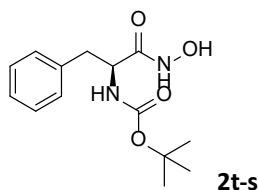

white solid,  $^1\text{H}$  NMR (400 MHz,  $\text{DMSO-}d_6$ )  $\delta$  10.61 (d,  $J = 1.6$  Hz, 1H), 8.83 (d,  $J = 1.6$  Hz, 1H), 7.36-7.12 (m, 5H), 6.96 (d,  $J = 8.6$  Hz, 1H), 4.07-4.01 (m, 1H), 2.91-2.71 (m, 2H), 1.31 (s, 9H).  $^{13}\text{C}$  NMR (101 MHz,  $\text{DMSO-}d_6$ )  $\delta$  168.88, 155.56, 138.52, 129.64, 128.49, 126.67, 78.38, 53.99, 38.17, 28.63, 28.31. MS (ESI):  $m/z$  [ $\text{M+Na}$ ] $^+$ : 303.1. m.p. 136-138  $^\circ\text{C}$ .

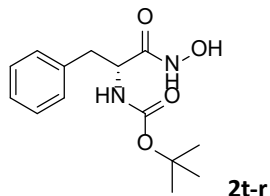

white solid,  $^1\text{H}$  NMR (400 MHz,  $\text{DMSO-}d_6$ )  $\delta$  10.60 (s, 1H), 8.83 (s, 1H), 7.34 - 7.12 (m, 5H), 6.96 (d,  $J = 8.6$  Hz, 1H), 4.07-4.01 (m, 1H), 2.92-2.70 (m, 2H), 1.31 (s, 9H).  $^{13}\text{C}$  NMR (101 MHz,  $\text{DMSO-}d_6$ )  $\delta$  168.88, 155.55, 138.52, 129.63, 128.49, 126.67, 78.38, 53.98, 38.18, 28.63, 28.32. MS (ESI):  $m/z$  [ $\text{M+Na}$ ] $^+$ : 303.1. m.p. 140-143  $^\circ\text{C}$ .

**Figure S1.** HPLC spectrum of Vorinostat (1st run)

Column: Shimadzu Wondasil Superb C18 (5 µm; 150 mm × 4.6 mm),

Flow Rate: 1 mL/min;

Oven Temp: 30 °C;

Inj. volume: 5 µL;

Detection: 241 nm

Eluent: 0.1 % phosphoric acid (aq): acetonitrile =60 : 40.

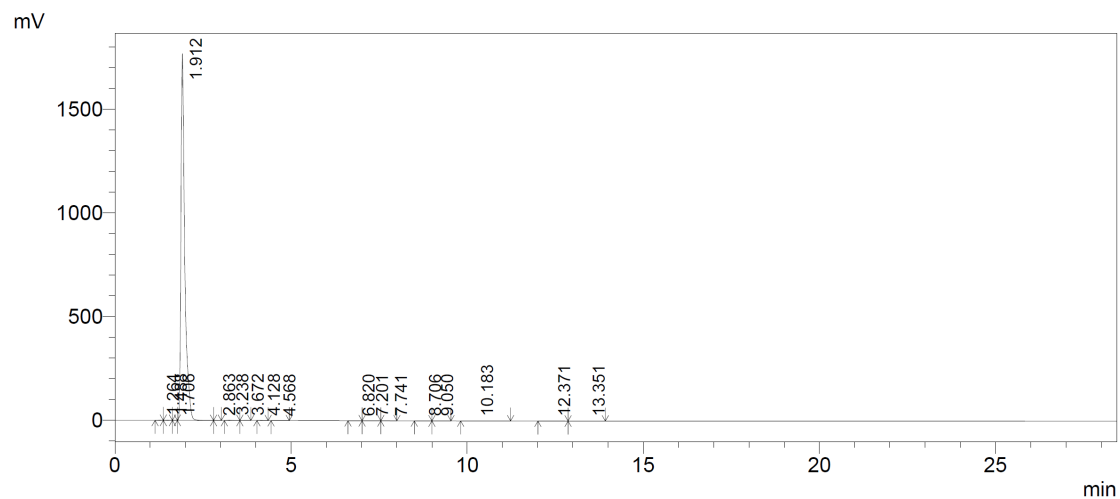

| peak# | retention time | peakarea | peak height | area %  | height % |
|-------|----------------|----------|-------------|---------|----------|
| 1     | 1.264          | 10014    | 1440        | 0.074   | 0.081    |
| 2     | 1.488          | 14919    | 1368        | 0.110   | 0.077    |
| 3     | 1.706          | 7437     | 1191        | 0.055   | 0.067    |
| 4     | 1.912          | 13437975 | 1769273     | 99.137  | 99.454   |
| 5     | 2.863          | 1034     | 169         | 0.008   | 0.010    |
| 6     | 3.238          | 17490    | 1926        | 0.129   | 0.108    |
| 7     | 3.672          | 4921     | 588         | 0.036   | 0.033    |
| 8     | 4.128          | 2467     | 298         | 0.018   | 0.017    |
| 9     | 4.568          | 2664     | 246         | 0.020   | 0.014    |
| 10    | 6.820          | 2050     | 177         | 0.015   | 0.010    |
| 11    | 7.201          | 3800     | 278         | 0.028   | 0.016    |
| 12    | 7.741          | 3377     | 244         | 0.025   | 0.014    |
| 13    | 8.706          | 2220     | 94          | 0.016   | 0.005    |
| 14    | 9.050          | 2060     | 110         | 0.015   | 0.006    |
| 15    | 10.183         | 24986    | 966         | 0.184   | 0.054    |
| 16    | 12.371         | 7703     | 316         | 0.057   | 0.018    |
| 17    | 13.351         | 9845     | 308         | 0.073   | 0.017    |
| total |                | 13554964 | 1778991     | 100.000 | 100.000  |

**Figure S2.** HPLC spectrum of Vorinostat (2nd run)

Column: Shimadzu Wondasil Superb C18 (5  $\mu$ m; 150 mm  $\times$  4.6 mm),

Flow Rate: 1 mL/min;

Oven Temp: 30  $^{\circ}$ C;

Inj. volume: 5  $\mu$ L;

Detection: 241 nm

Eluent: 0.1 % phosphoric acid (aq): acetonitrile =60 : 40.

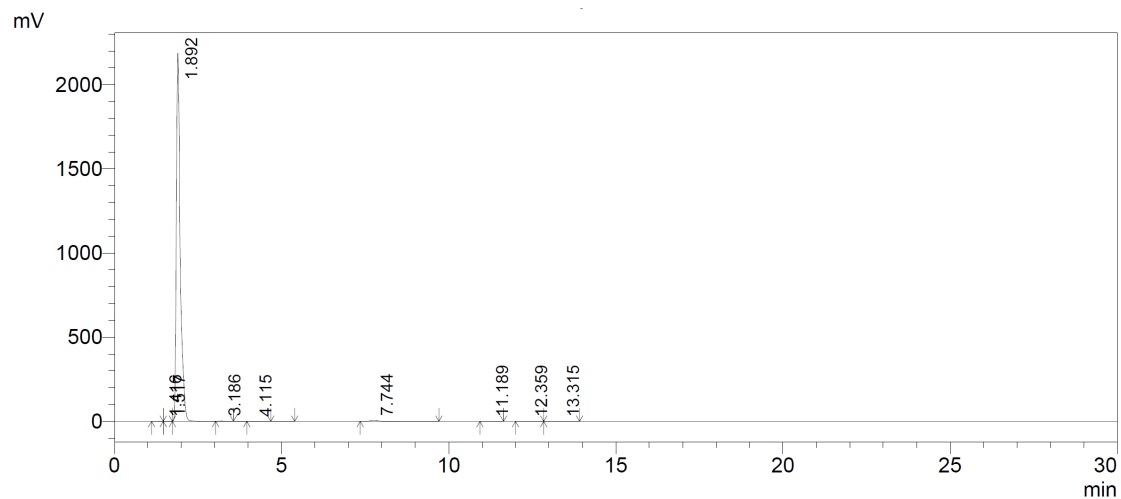

| peak# | retention time | peak area | peak height | area %  | height % |
|-------|----------------|-----------|-------------|---------|----------|
| 1     | 1.416          | 7400      | 869         | 0.041   | 0.040    |
| 2     | 1.517          | 10309     | 986         | 0.057   | 0.045    |
| 3     | 1.892          | 18010897  | 2187695     | 99.048  | 99.533   |
| 4     | 3.186          | 23899     | 2311        | 0.131   | 0.105    |
| 5     | 4.115          | 8937      | 731         | 0.049   | 0.033    |
| 6     | 7.744          | 104062    | 4692        | 0.572   | 0.213    |
| 7     | 11.189         | 2616      | 108         | 0.014   | 0.005    |
| 8     | 12.359         | 7130      | 279         | 0.039   | 0.013    |
| 9     | 13.315         | 8843      | 293         | 0.049   | 0.013    |
| total |                | 18184093  | 2197964     | 100.000 | 100.000  |

**Figure S3.** HPLC spectrum of Vorinostat (3rd run)

Column: Shimadzu Wondasil Superb C18 (5  $\mu$ m; 150 mm  $\times$  4.6 mm),

Flow Rate: 1 mL/min;

Oven Temp: 30  $^{\circ}$ C;

Inj. volume: 5  $\mu$ L;

Detection: 241 nm

Eluent: 0.1 % phosphoric acid (aq): acetonitrile =60 : 40.

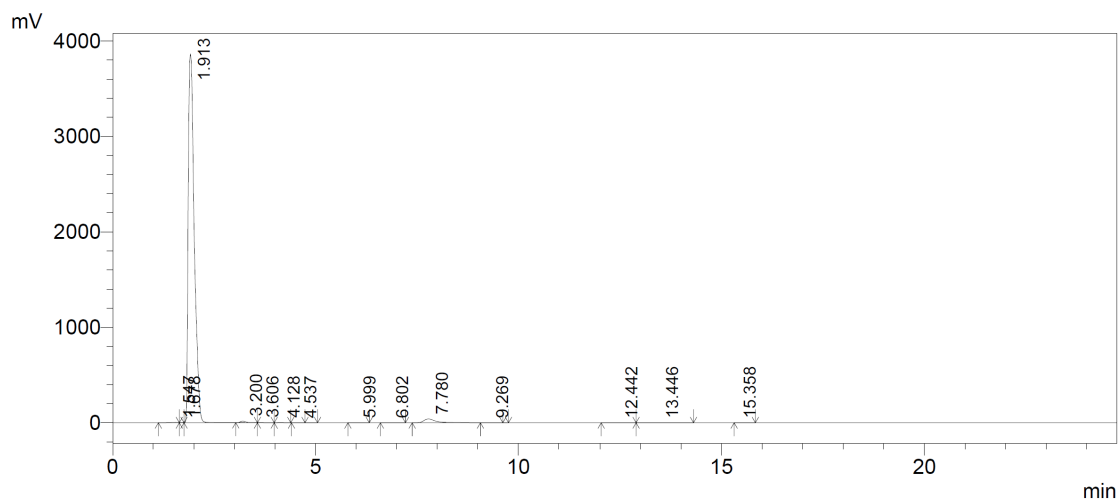

| peak# | retention time | peak area | peak height | area %  | height % |
|-------|----------------|-----------|-------------|---------|----------|
| 1     | 1.547          | 47007     | 3918        | 0.115   | 0.100    |
| 2     | 1.678          | 11396     | 1909        | 0.028   | 0.049    |
| 3     | 1.913          | 39857751  | 3865460     | 97.199  | 98.319   |
| 4     | 3.200          | 173687    | 17243       | 0.424   | 0.439    |
| 5     | 3.606          | 8270      | 1004        | 0.020   | 0.026    |
| 6     | 4.128          | 6479      | 669         | 0.016   | 0.017    |
| 7     | 4.537          | 2197      | 232         | 0.005   | 0.006    |
| 8     | 5.999          | 1532      | 126         | 0.004   | 0.003    |
| 9     | 6.802          | 1119      | 72          | 0.003   | 0.002    |
| 10    | 7.780          | 863668    | 39778       | 2.106   | 1.012    |
| 11    | 9.269          | 2192      | 135         | 0.005   | 0.003    |
| 12    | 12.442         | 8870      | 347         | 0.022   | 0.009    |
| 13    | 13.446         | 20558     | 585         | 0.050   | 0.015    |
| 14    | 15.358         | 1433      | 74          | 0.003   | 0.002    |
| total |                | 41006159  | 3931554     | 100.000 | 100.000  |



**Figure S4.** HPLC spectrum of Vorinostat (4th run)

Column: Shimadzu Wondasil Superb C18 (5  $\mu$ m; 150 mm  $\times$  4.6 mm),

Flow Rate: 1 mL/min;

Oven Temp: 30  $^{\circ}$ C;

Inj. volume: 5  $\mu$ L;

Detection: 241 nm

Eluent: 0.1 % phosphoric acid (aq): acetonitrile =60 : 40.

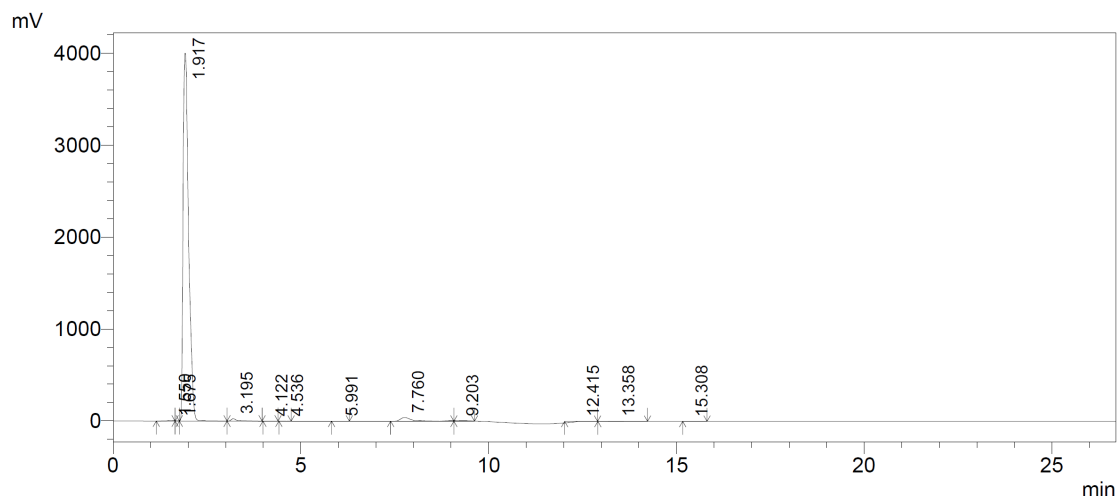

| peak# | retention time | peak area | peak height | area %  | height % |
|-------|----------------|-----------|-------------|---------|----------|
| 1     | 1.550          | 50740     | 4217        | 0.121   | 0.103    |
| 2     | 1.675          | 11181     | 1974        | 0.027   | 0.048    |
| 3     | 1.917          | 40823301  | 4001088     | 97.044  | 98.157   |
| 4     | 3.195          | 260487    | 25311       | 0.619   | 0.621    |
| 5     | 4.122          | 6647      | 702         | 0.016   | 0.017    |
| 6     | 4.536          | 2197      | 239         | 0.005   | 0.006    |
| 7     | 5.991          | 5027      | 412         | 0.012   | 0.010    |
| 8     | 7.760          | 874760    | 41125       | 2.079   | 1.009    |
| 9     | 9.203          | 1986      | 111         | 0.005   | 0.003    |
| 10    | 12.415         | 8505      | 352         | 0.020   | 0.009    |
| 11    | 13.358         | 20479     | 621         | 0.049   | 0.015    |
| 12    | 15.308         | 1650      | 64          | 0.004   | 0.002    |
| total |                | 42066960  | 4076216     | 100.000 | 100.000  |

**Figure S5.** Chiral HPLC spectrum of **2t**

Column: CHIRALPAK®AD-H (4.6mm×250 mL, Particle Size5µm)

Flow Rate: 0.6 mL/min;

Oven Temp: 30 °C;

Inj. volume: 1 µL;

Detection: 210 nm

Eluent: hexane: isopropanol = 96 : 4.

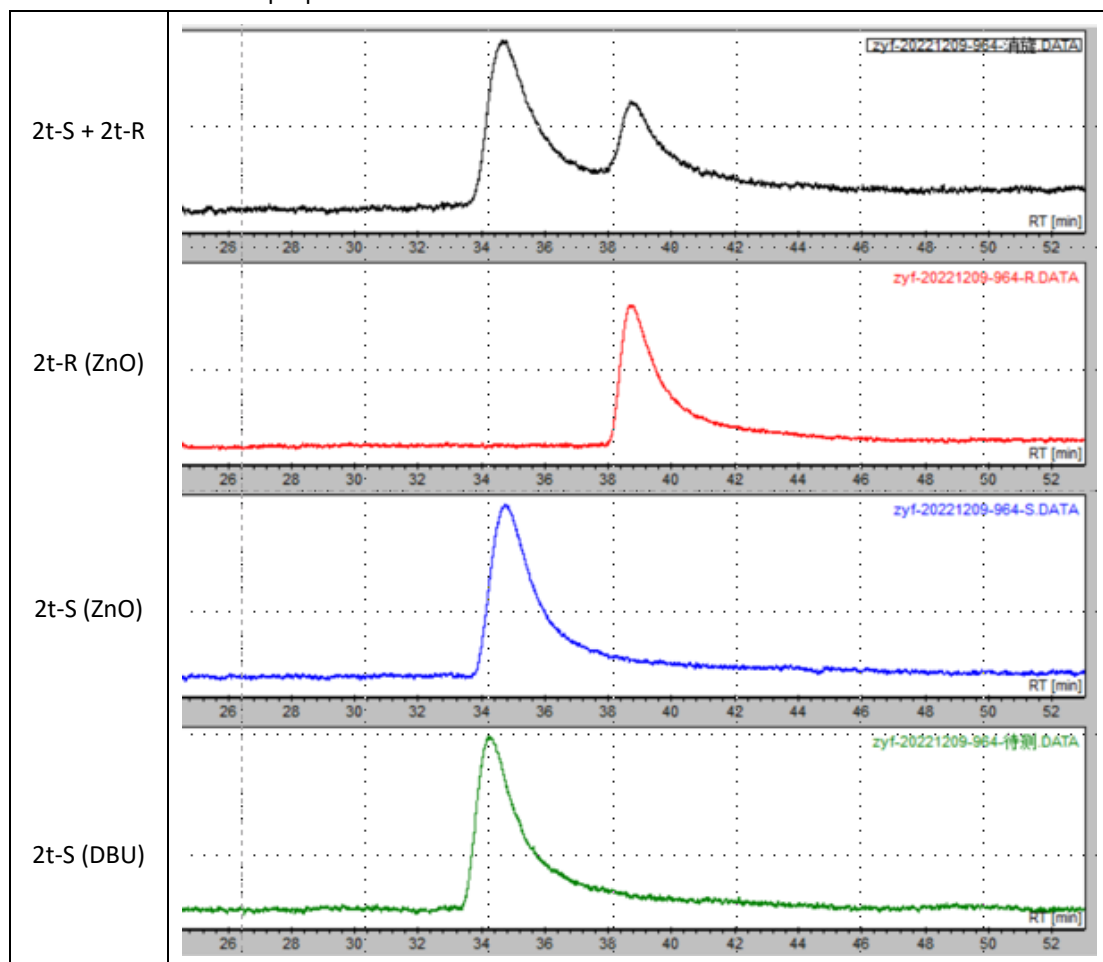

**Figure S6.** XRD spectrum of ZnO  
Zn-1-N (Before use); Zn-2 (Recycle)

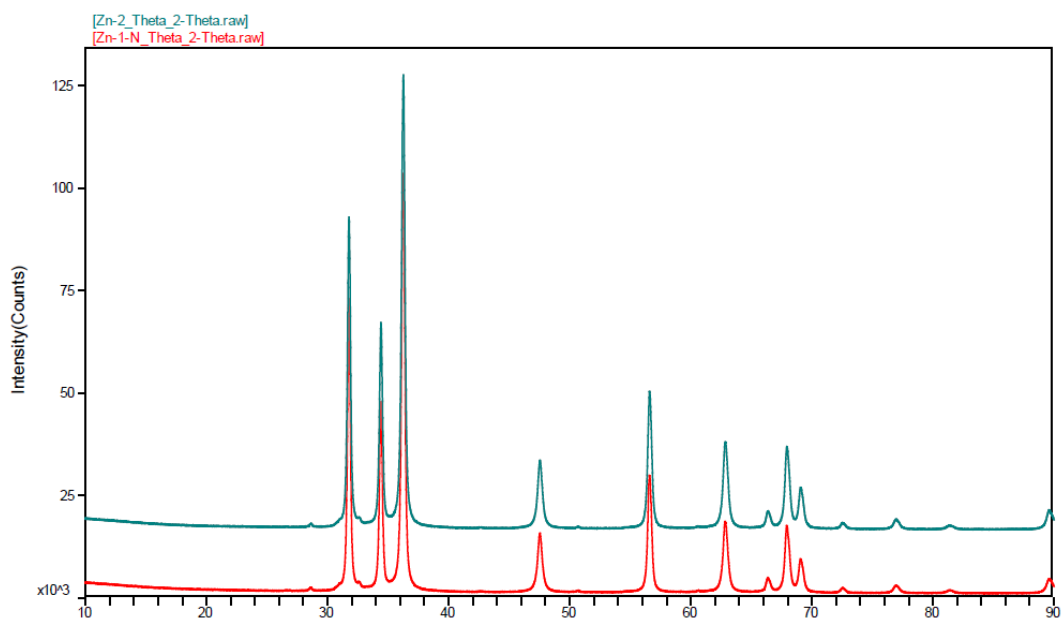

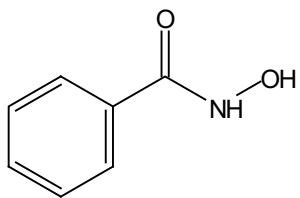

**2a**

—11.1963

—9.0321  
7.7679  
7.7624  
7.7594  
7.7554  
7.7473  
7.7420  
7.7380  
7.5375  
7.5340  
7.5306  
7.5224  
7.5157  
7.5100  
7.5012  
7.4976  
7.4939  
7.4669  
7.4630  
7.4520  
7.4478  
7.4432  
7.4346  
7.4304  
7.4268

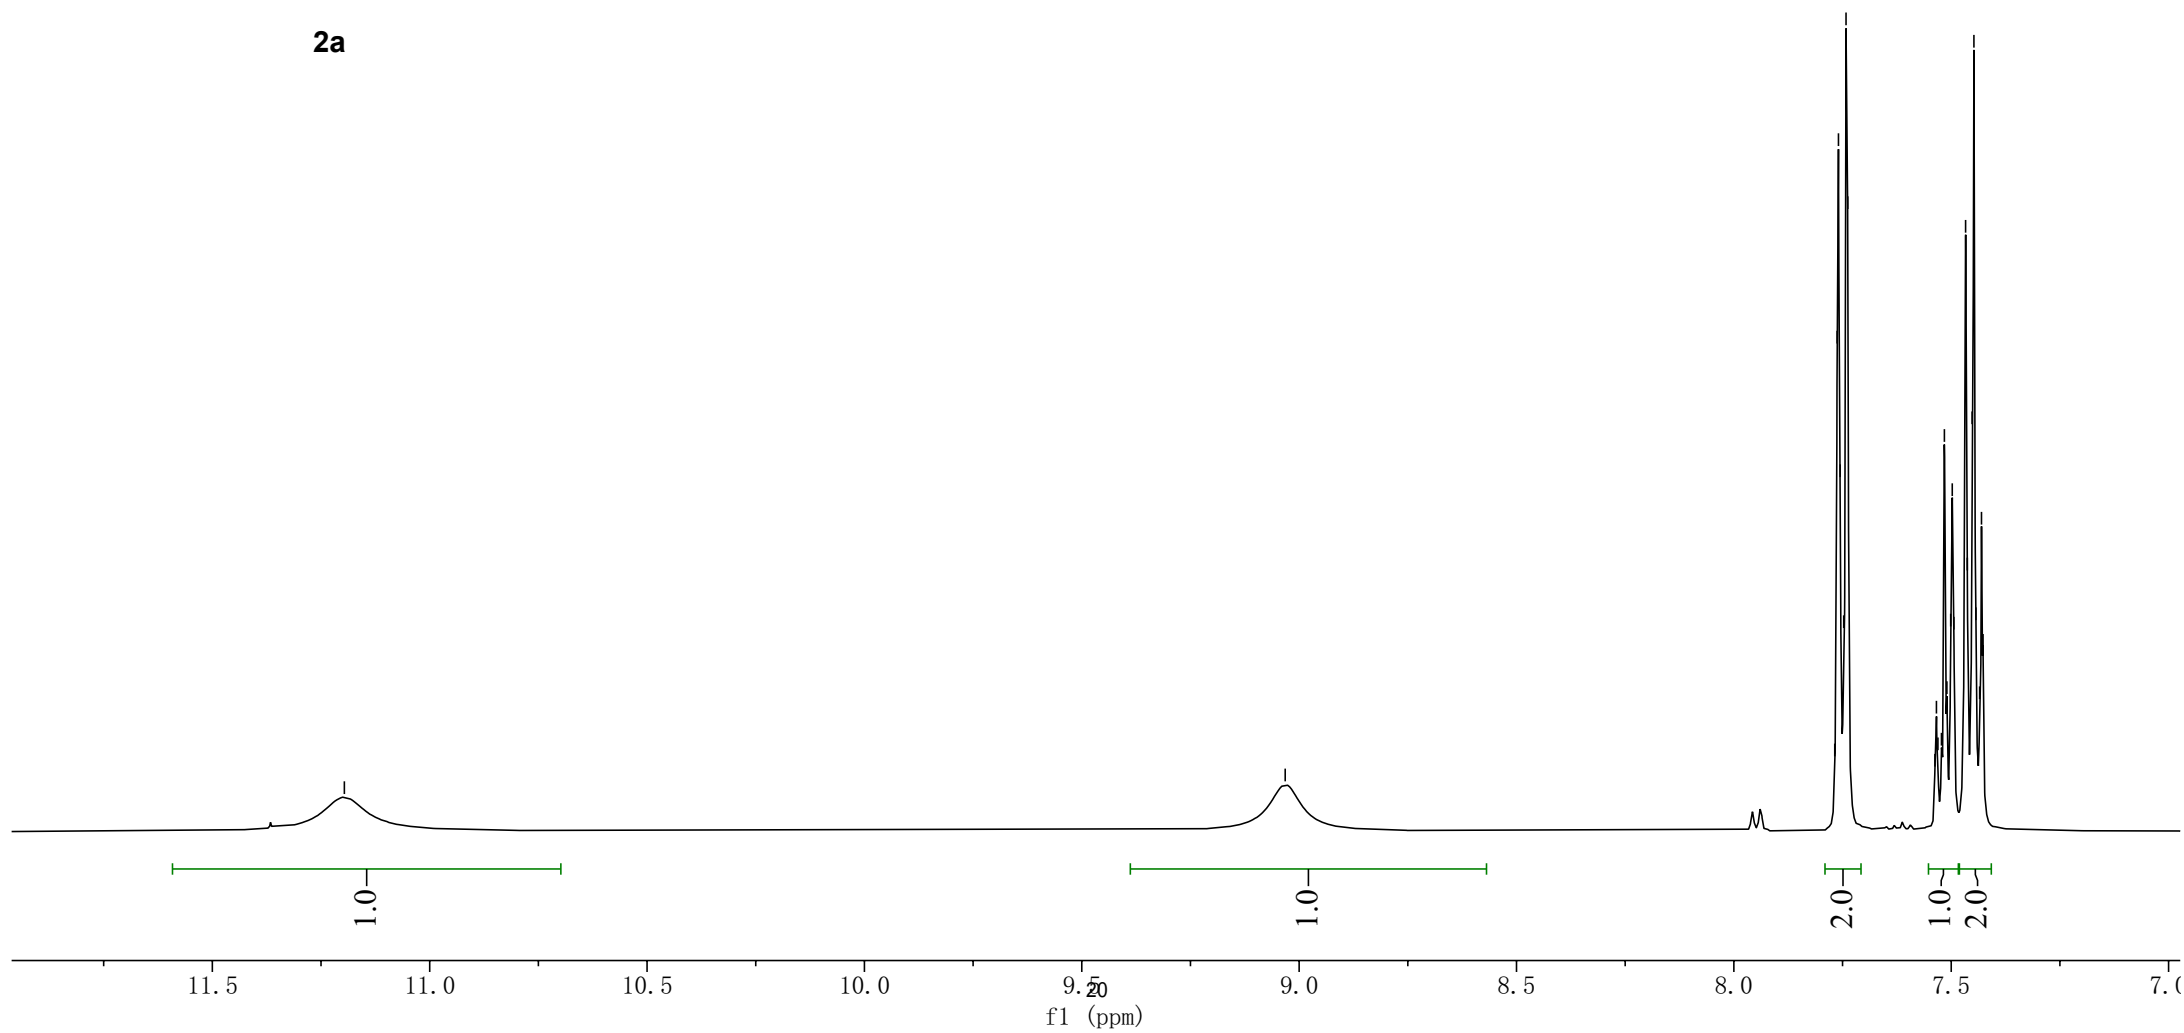

—164.6368

—133.2544

—131.5756

—128.8369

—127.3075

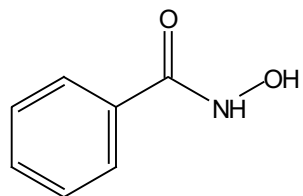

**2a**

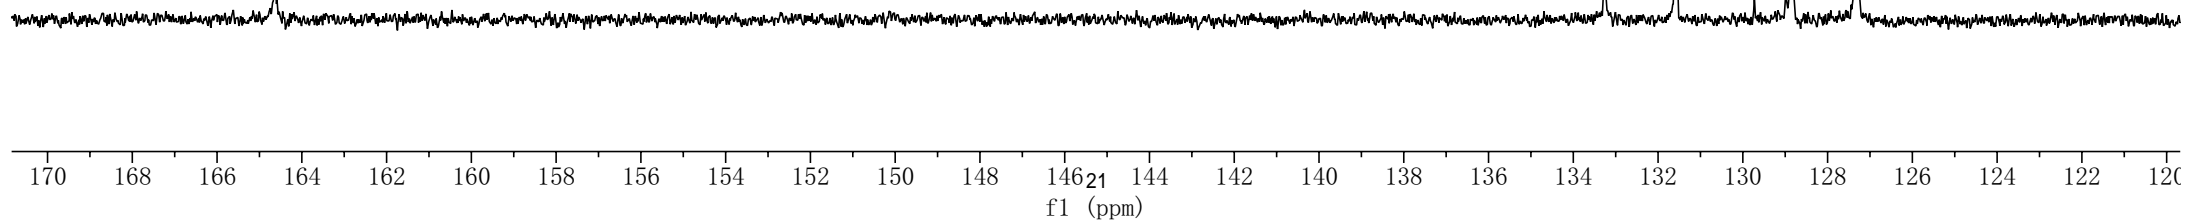

# Qualitative Analysis Report

|                               |              |                      |                      |
|-------------------------------|--------------|----------------------|----------------------|
| <b>Data Filename</b>          | H-0.d        | <b>Sample Name</b>   | H-0                  |
| <b>Sample Type</b>            | Sample       | <b>Position</b>      | P1-F8                |
| <b>Instrument Name</b>        | Instrument 1 | <b>User Name</b>     |                      |
| <b>Acq Method</b>             | FU100-1000.m | <b>Acquired Time</b> | 9/10/2021 9:05:34 PM |
| <b>IRM Calibration Status</b> | Success      | <b>DA Method</b>     | 20170311.m           |
| <b>Comment</b>                |              |                      |                      |

|                       |                             |              |
|-----------------------|-----------------------------|--------------|
| <b>Sample Group</b>   |                             | <b>Info.</b> |
| <b>Acquisition SW</b> | 6200 series TOF/6500 series |              |
| <b>Version</b>        | Q-TOF B.05.01 (B5125.2)     |              |

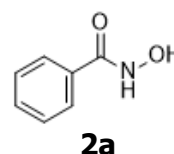

## User Spectra

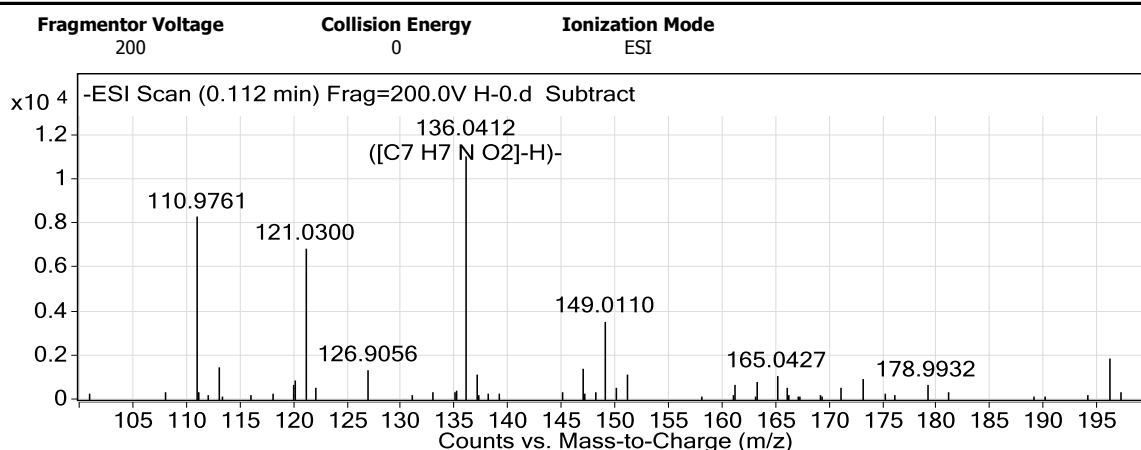

## Peak List

| m/z      | z | Abund    | Formula    | Ion    |
|----------|---|----------|------------|--------|
| 110.9761 |   | 8326.06  |            |        |
| 121.03   | 1 | 6906.38  |            |        |
| 136.0412 | 1 | 11077.74 | C7 H7 N O2 | (M-H)- |
| 223.0301 | 1 | 5681     |            |        |
| 239.0846 | 1 | 16485.32 |            |        |
| 283.2657 | 1 | 4745.81  |            |        |
| 339.2348 | 1 | 30515.69 |            |        |
| 340.2387 | 1 | 7083.83  |            |        |
| 423.2053 | 1 | 5390.46  |            |        |
| 424.2862 | 1 | 4445.02  |            |        |

## Formula Calculator Element Limits

| Element | Min | Max |
|---------|-----|-----|
| C       | 3   | 60  |
| H       | 0   | 120 |
| O       | 0   | 30  |
| N       | 0   | 30  |
| Cl      | 0   | 0   |
| F       | 0   | 0   |
| S       | 0   | 0   |
| Br      | 0   | 0   |

## Formula Calculator Results

| Formula    | Best | Mass     | Tgt Mass | Diff (ppm) | Ion Species | Score |
|------------|------|----------|----------|------------|-------------|-------|
| C7 H7 N O2 | TRUE | 137.0484 | 137.0477 | -5.26      | C7 H6 N O2  | 81.43 |

--- End Of Report ---

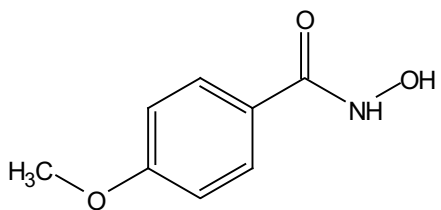

**2b**

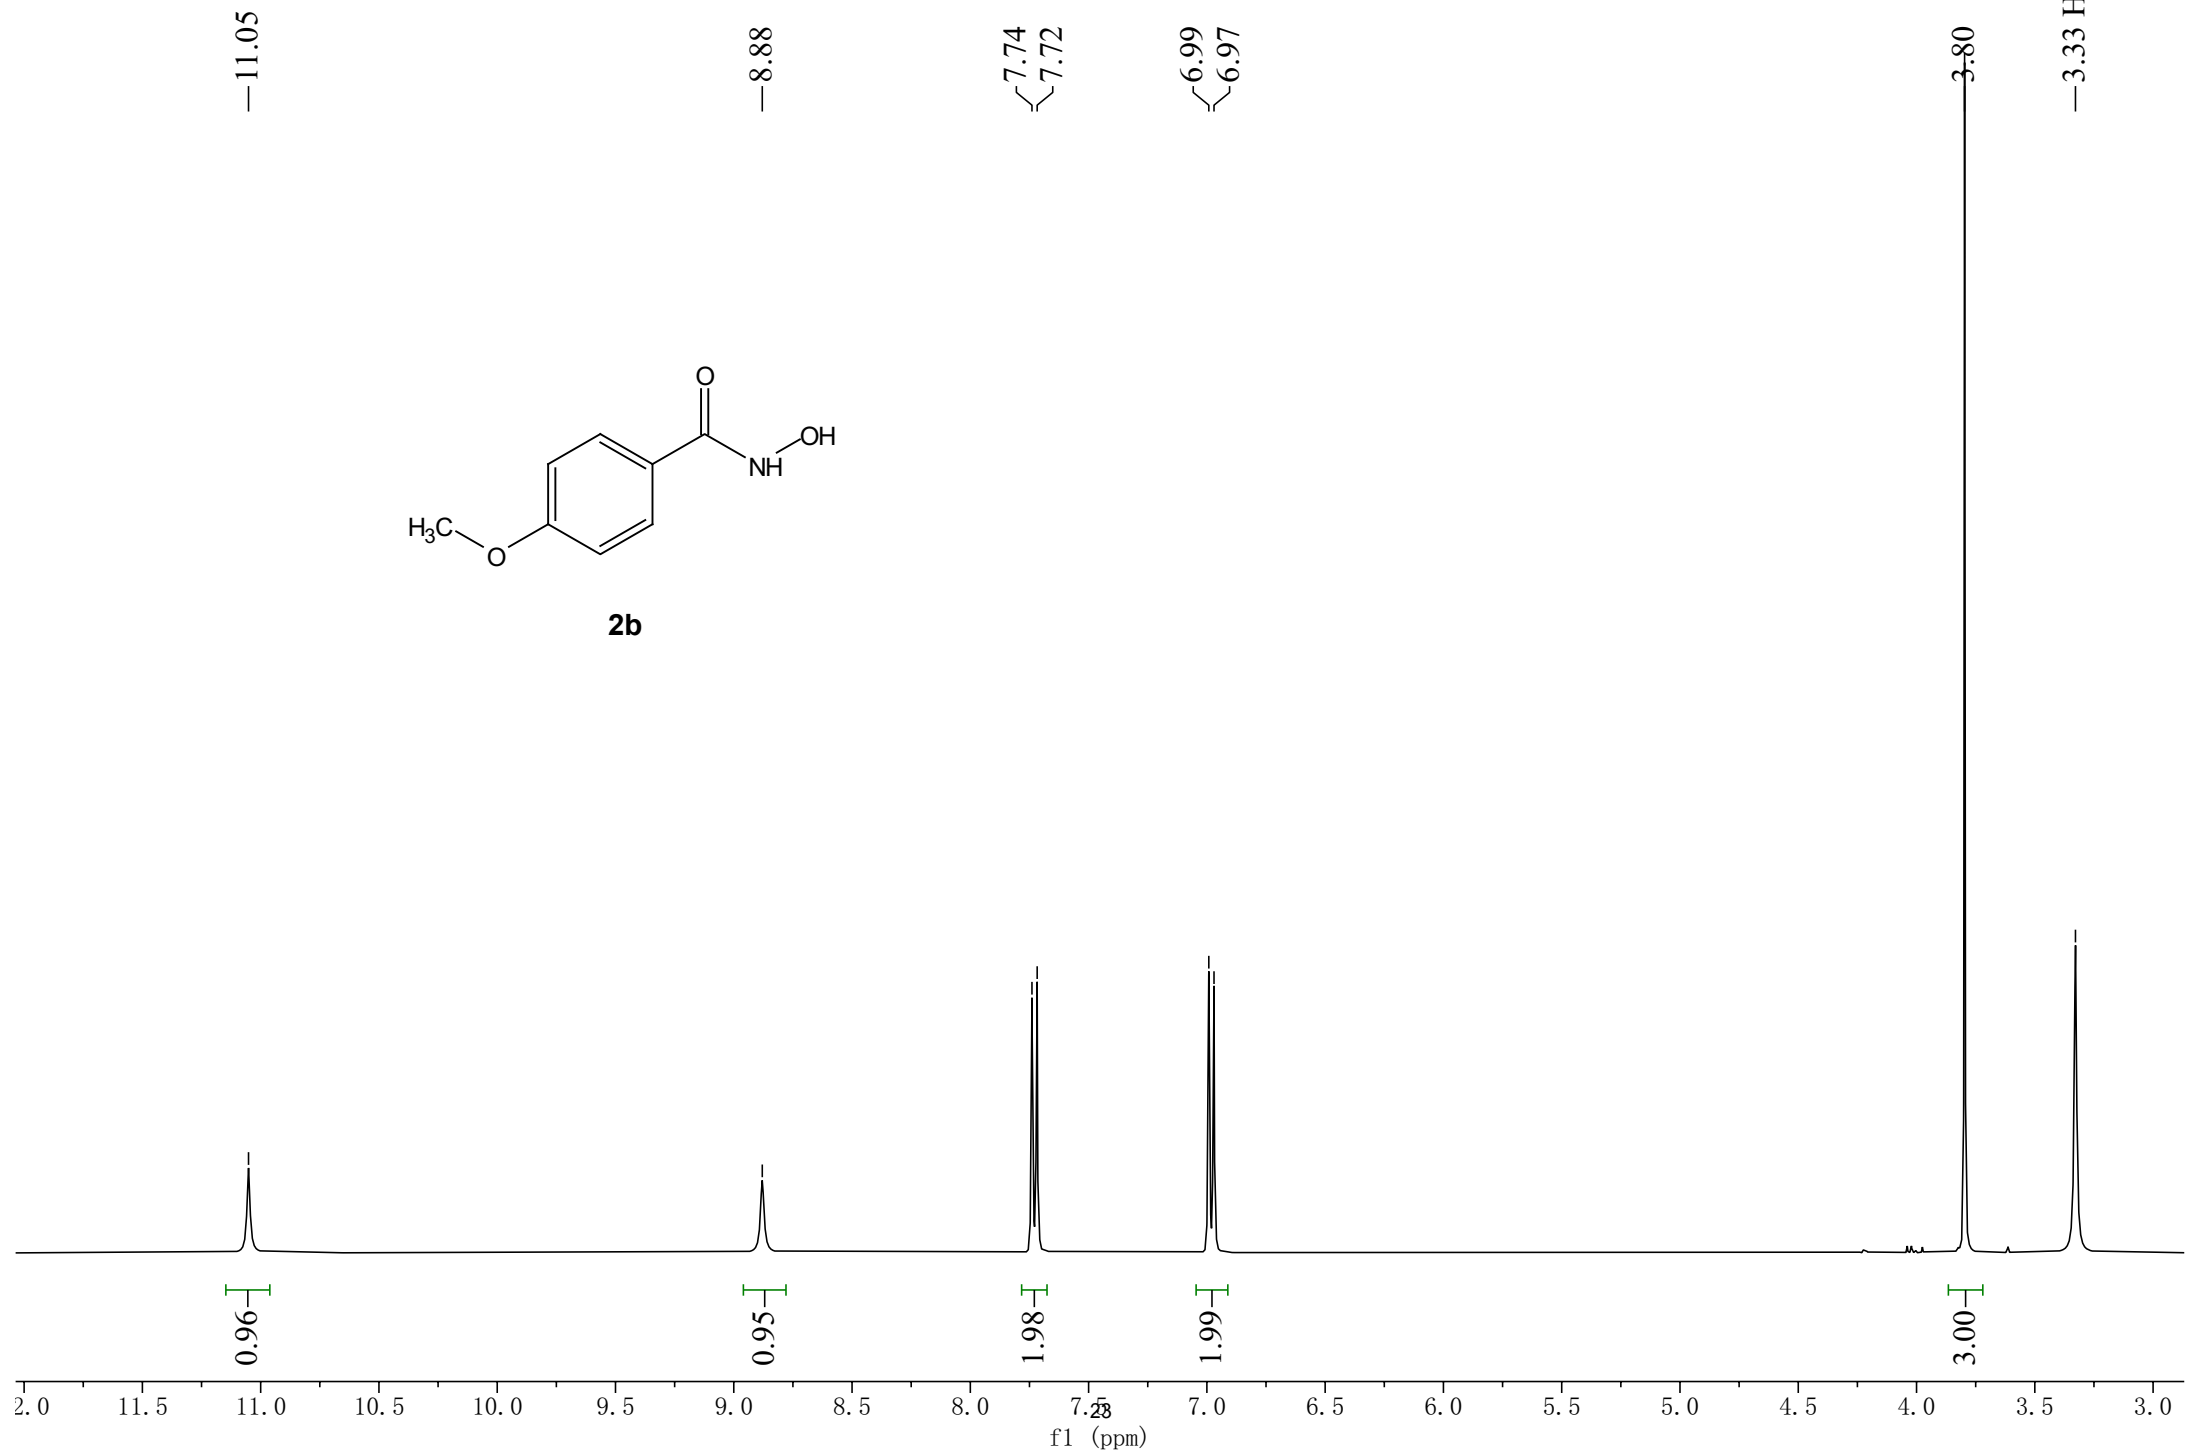

—164.52  
—161.97

—129.10  
—125.42

—114.09

—55.79

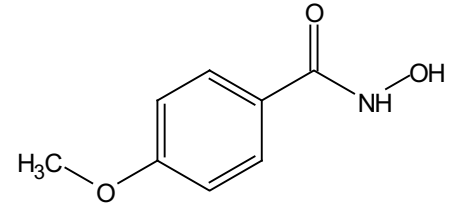

**2b**

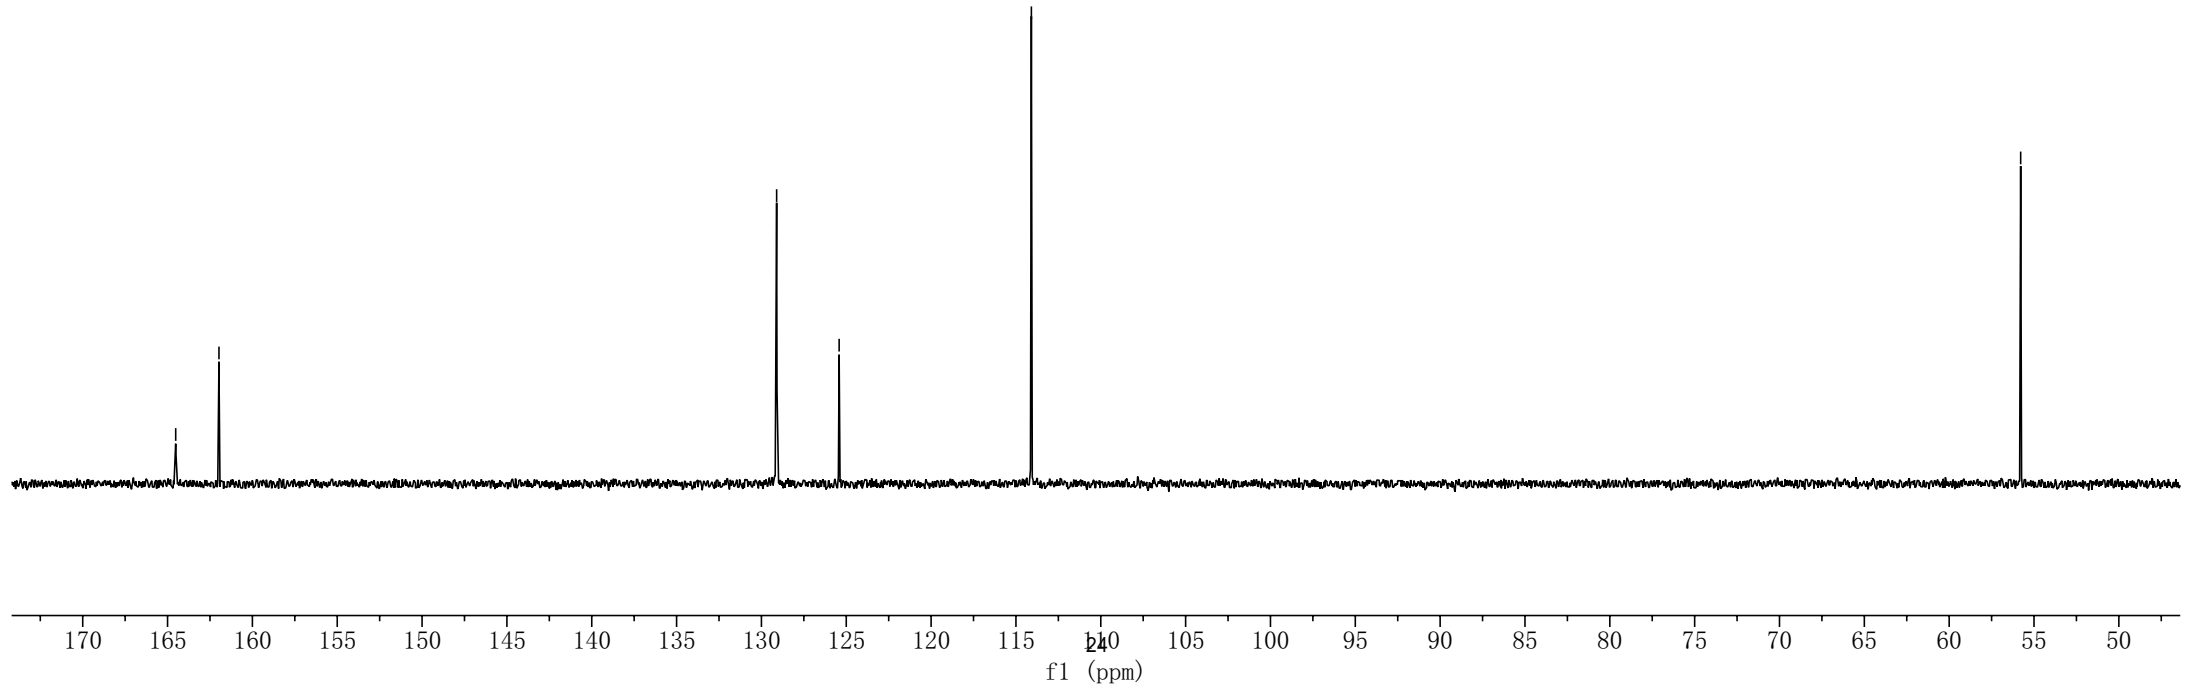



# Qualitative Analysis Report

|                               |              |                      |                      |
|-------------------------------|--------------|----------------------|----------------------|
| <b>Data Filename</b>          | H-14.d       | <b>Sample Name</b>   | H-14                 |
| <b>Sample Type</b>            | Sample       | <b>Position</b>      | P1-E7                |
| <b>Instrument Name</b>        | Instrument 1 | <b>User Name</b>     |                      |
| <b>Acq Method</b>             | FU100-1000.m | <b>Acquired Time</b> | 9/10/2021 8:36:13 PM |
| <b>IRM Calibration Status</b> | Success      | <b>DA Method</b>     | 20170311.m           |
| <b>Comment</b>                |              |                      |                      |

**Sample Group** Info.  
**Acquisition SW** 6200 series TOF/6500 series  
**Version** Q-TOF B.05.01 (B5125.2)

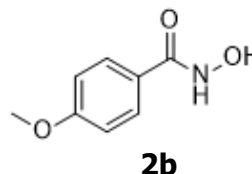

## User Spectra

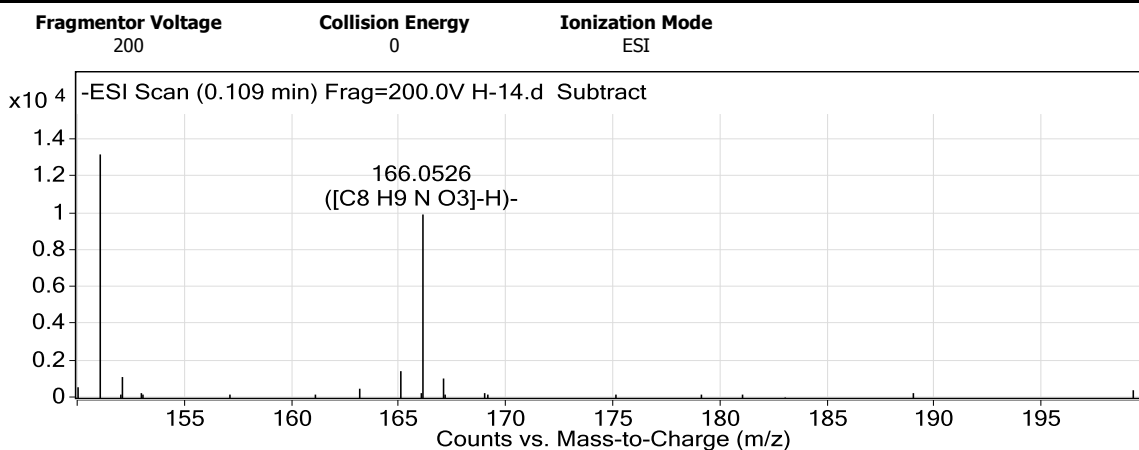

### Peak List

| m/z      | z | Abund    | Formula    | Ion    |
|----------|---|----------|------------|--------|
| 107.0384 |   | 8023.11  |            |        |
| 108.0227 |   | 7638.1   |            |        |
| 110.9762 |   | 14154.65 |            |        |
| 121.03   | 1 | 17062.03 |            |        |
| 151.0294 | 1 | 13241.24 |            |        |
| 166.0526 | 1 | 9999.13  | C8 H9 N O3 | (M-H)- |
| 283.2657 | 1 | 6949.43  |            |        |
| 339.2341 | 1 | 31390.84 |            |        |
| 340.2364 | 1 | 7349.99  |            |        |
| 459.3275 | 1 | 8567.12  |            |        |

### Formula Calculator Element Limits

| Element | Min | Max |
|---------|-----|-----|
| C       | 3   | 60  |
| H       | 0   | 120 |
| O       | 0   | 30  |
| N       | 0   | 30  |
| Cl      | 0   | 0   |
| F       | 0   | 0   |
| Br      | 0   | 0   |

### Formula Calculator Results

| Formula    | Best | Mass     | Tgt Mass | Diff (ppm) | Ion Species | Score |
|------------|------|----------|----------|------------|-------------|-------|
| C8 H9 N O3 | TRUE | 167.0597 | 167.0582 | -8.51      | C8 H8 N O3  | 70.75 |

--- End Of Report ---

—10.95

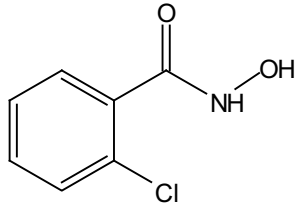

**2c**

—9.21

7.51  
7.49  
7.48  
7.47  
7.46  
7.45  
7.45  
7.44  
7.43  
7.42  
7.40  
7.40  
7.39  
7.39  
7.38  
7.38  
7.36  
7.36

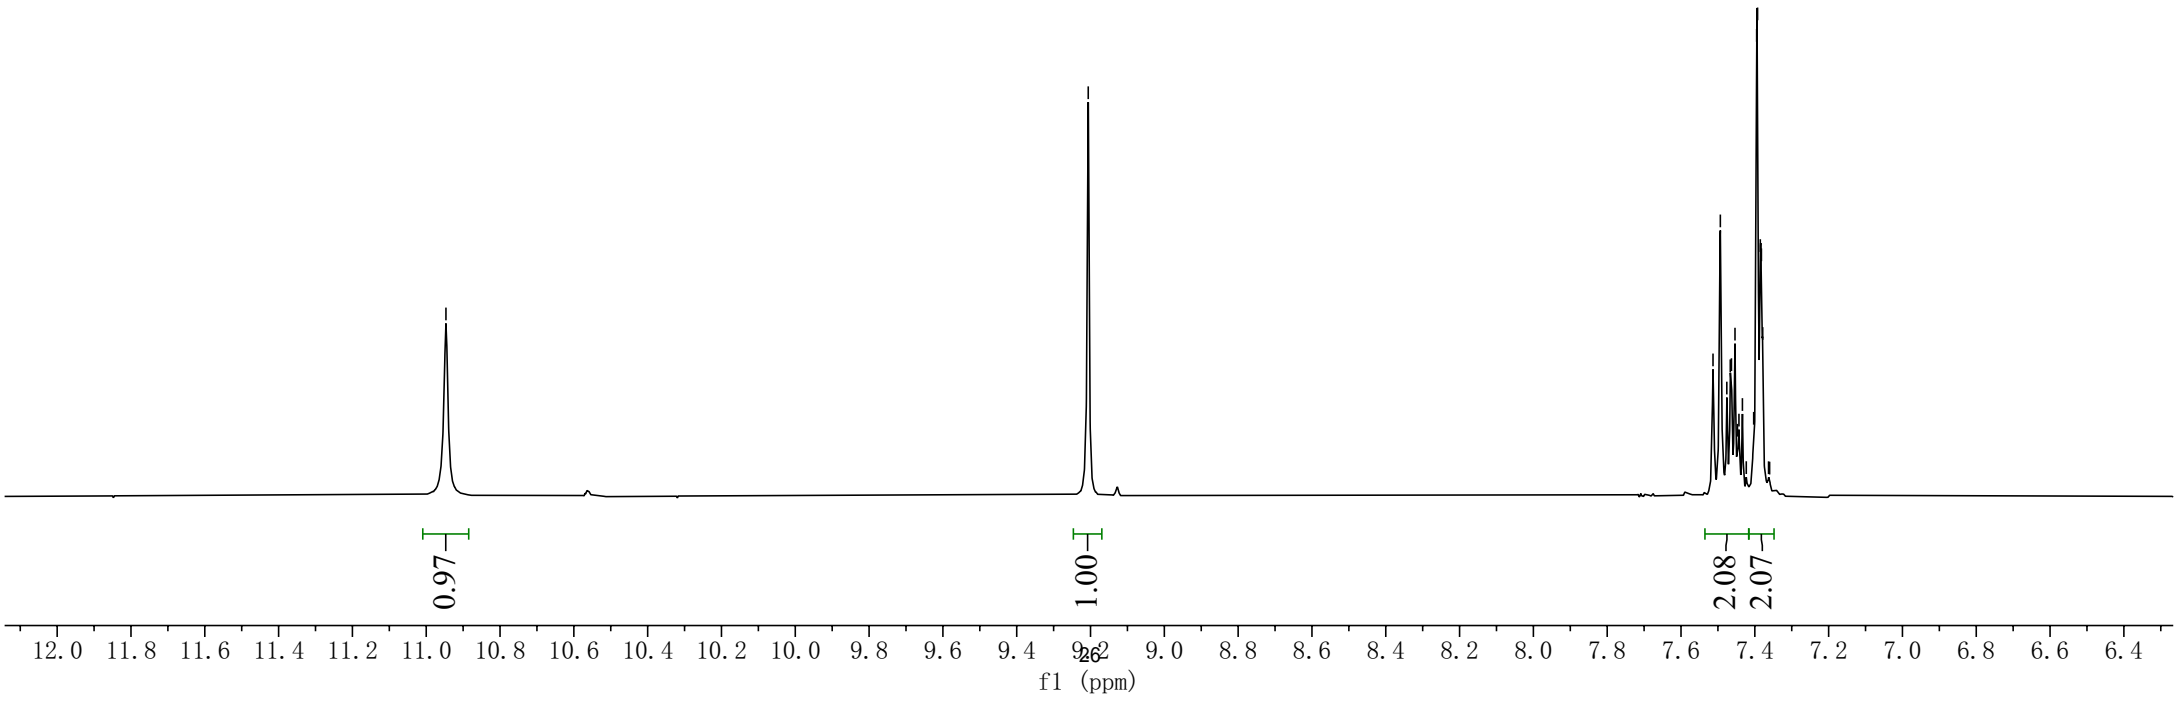

—163.74

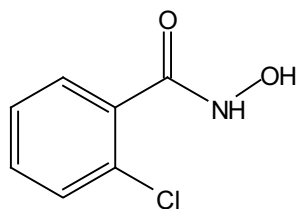

**2c**

—135.10

✓131.55

—131.08

✓130.15

✓129.82

—127.57

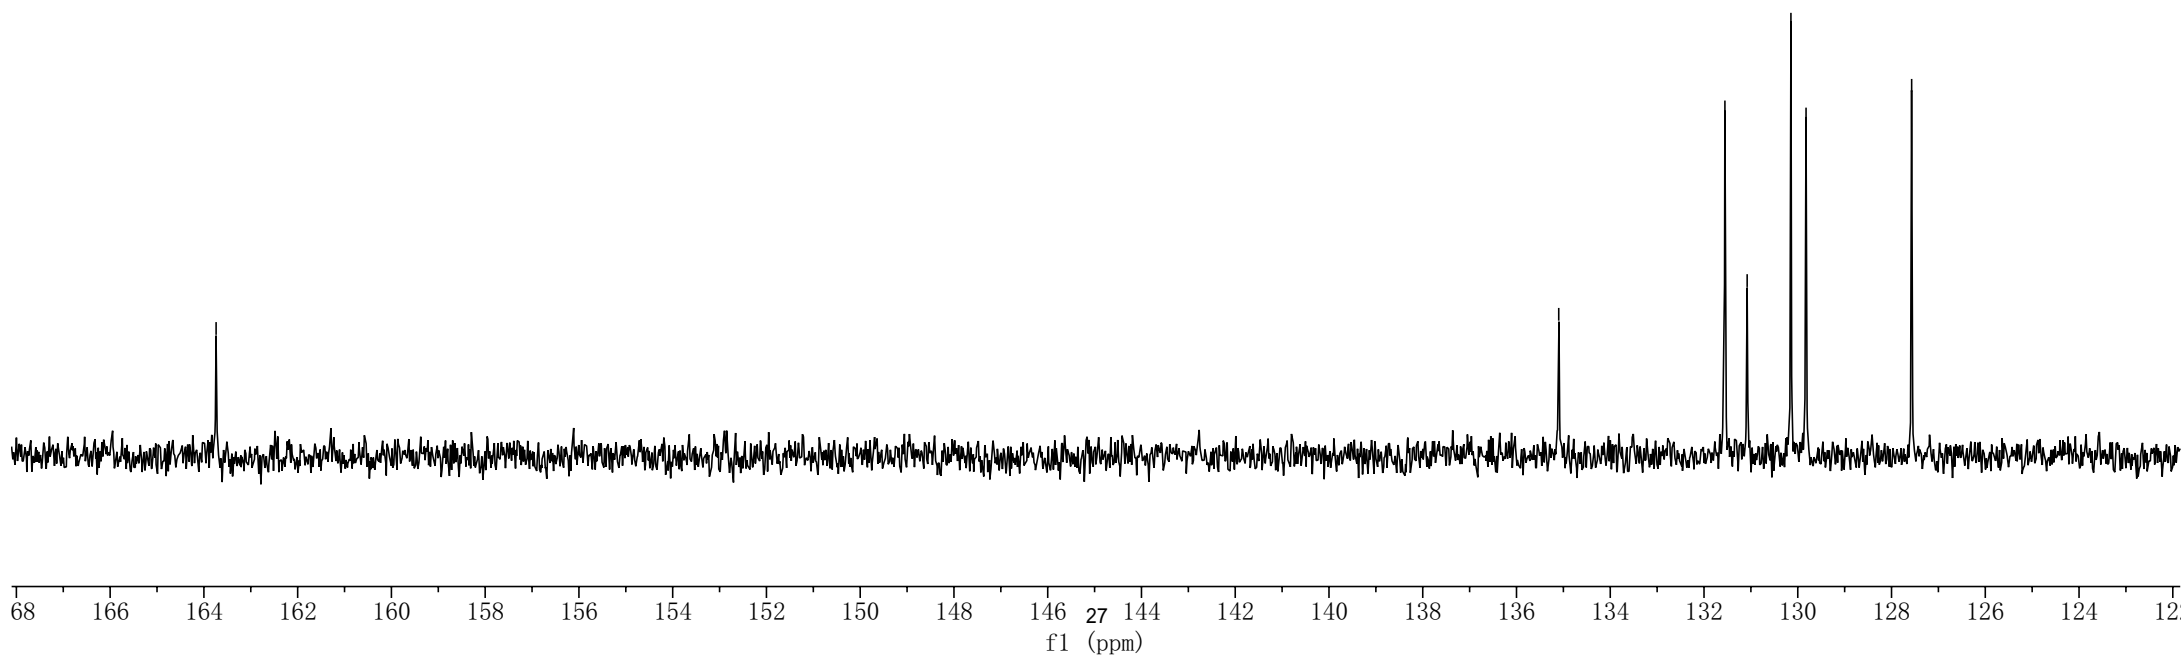

# Qualitative Analysis Report

|                               |              |                      |                      |
|-------------------------------|--------------|----------------------|----------------------|
| <b>Data Filename</b>          | H-5.d        | <b>Sample Name</b>   | H-5                  |
| <b>Sample Type</b>            | Sample       | <b>Position</b>      | P1-D7                |
| <b>Instrument Name</b>        | Instrument 1 | <b>User Name</b>     |                      |
| <b>Acq Method</b>             | FU100-1000.m | <b>Acquired Time</b> | 9/10/2021 8:09:46 PM |
| <b>IRM Calibration Status</b> | Success      | <b>DA Method</b>     | 20170311.m           |
| <b>Comment</b>                |              |                      |                      |

**Sample Group** Info.  
**Acquisition SW** 6200 series TOF/6500 series  
**Version** Q-TOF B.05.01 (B5125.2)

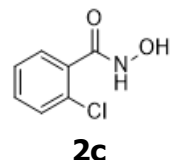

## User Spectra

**Fragmentor Voltage** 200      **Collision Energy** 0      **Ionization Mode** ESI

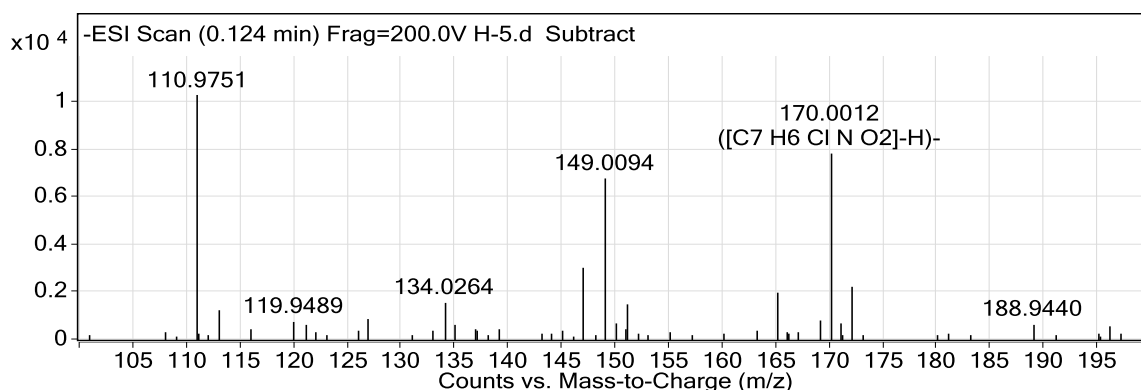

### Peak List

| m/z      | z | Abund    | Formula       | Ion    |
|----------|---|----------|---------------|--------|
| 110.9751 |   | 10296.62 |               |        |
| 149.0094 | 1 | 6810.69  |               |        |
| 170.0012 | 1 | 7862.36  | C7 H6 Cl N O2 | (M-H)- |
| 223.0281 | 1 | 9884.63  |               |        |
| 255.2315 | 1 | 8426.46  |               |        |
| 283.2633 | 1 | 7885.98  |               |        |
| 339.232  | 1 | 20531.96 |               |        |
| 340.2343 | 1 | 5633.36  |               |        |
| 423.2024 | 1 | 5422.42  |               |        |
| 486.1969 | 1 | 5105.35  |               |        |

### Formula Calculator Element Limits

| Element | Min | Max |
|---------|-----|-----|
| C       | 3   | 60  |
| H       | 0   | 120 |
| O       | 0   | 30  |
| N       | 0   | 30  |
| Cl      | 1   | 1   |
| F       | 0   | 0   |
| S       | 0   | 0   |
| Br      | 0   | 0   |

### Formula Calculator Results

| Formula       | Best | Mass     | Tgt Mass | Diff (ppm) | Ion Species   | Score |
|---------------|------|----------|----------|------------|---------------|-------|
| C7 H6 Cl N O2 | TRUE | 171.0084 | 171.0087 | 1.65       | C7 H5 Cl N O2 | 90.59 |

--- End Of Report ---

—11.52

—9.31

<8.31  
<8.29

<8.00  
<7.98

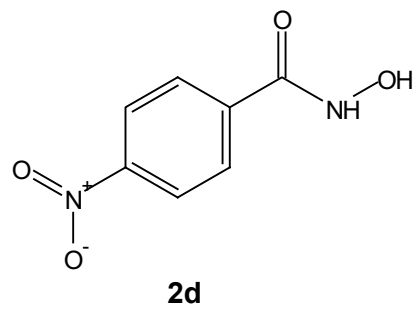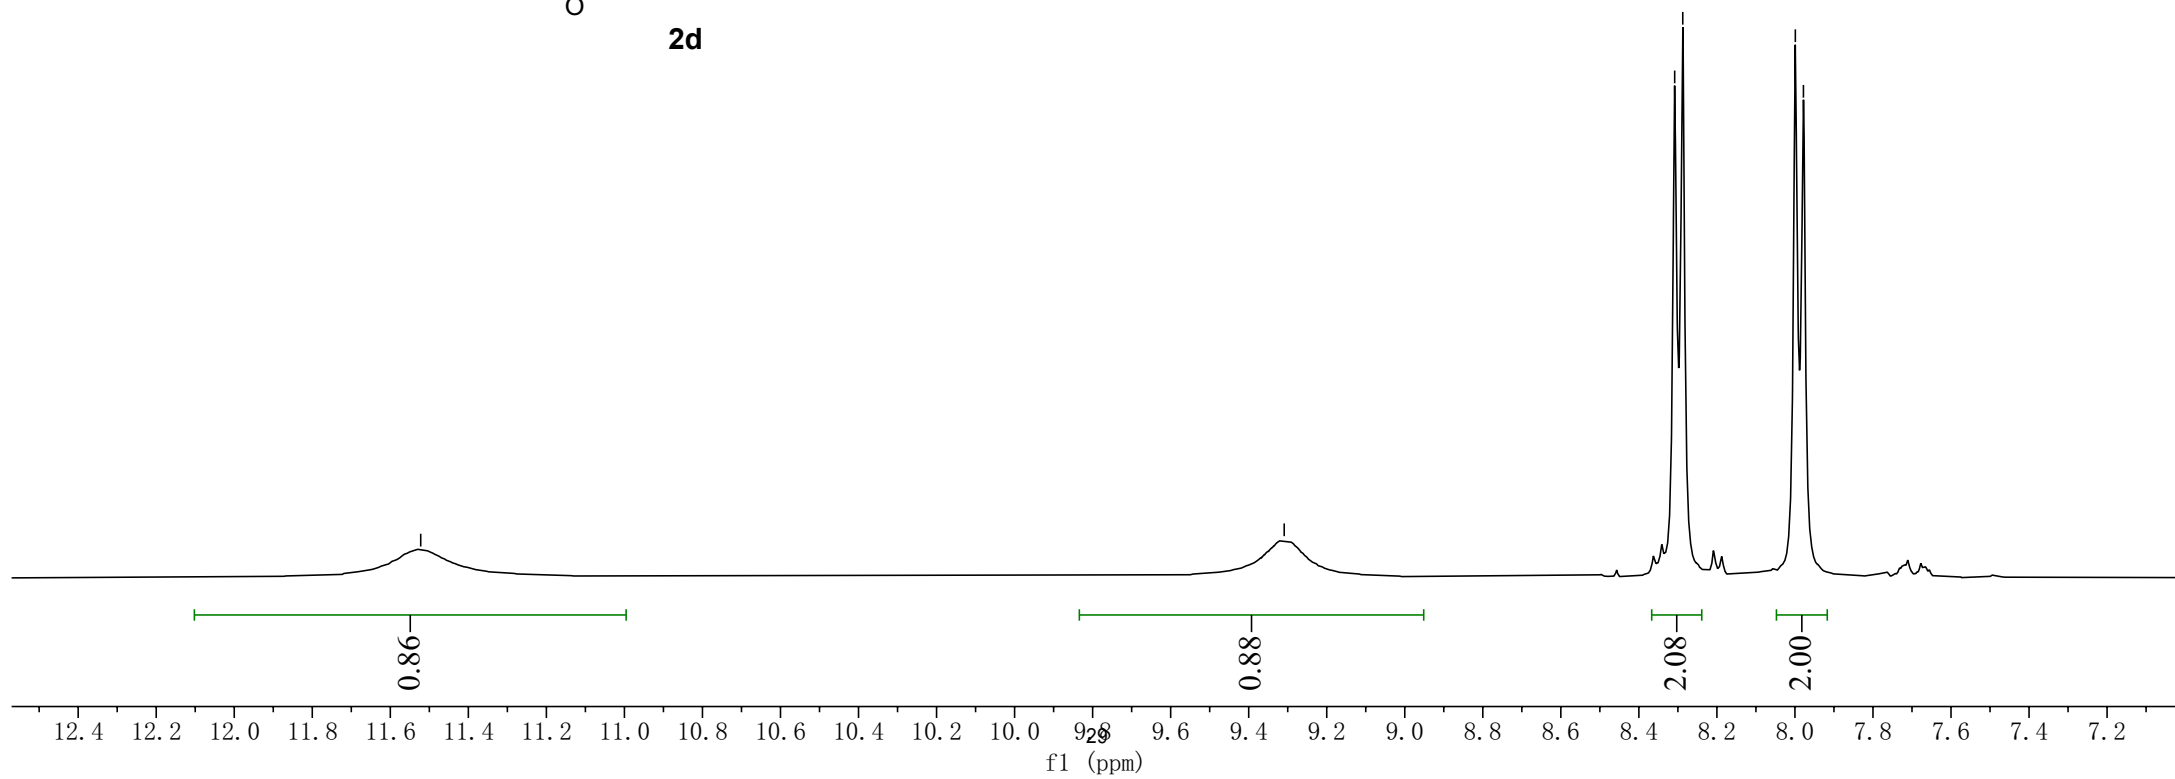

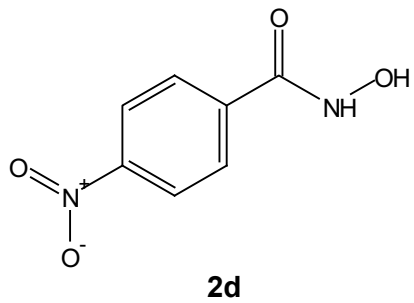

—162.7825

—149.4372

—138.9917

—128.8664

—124.0870

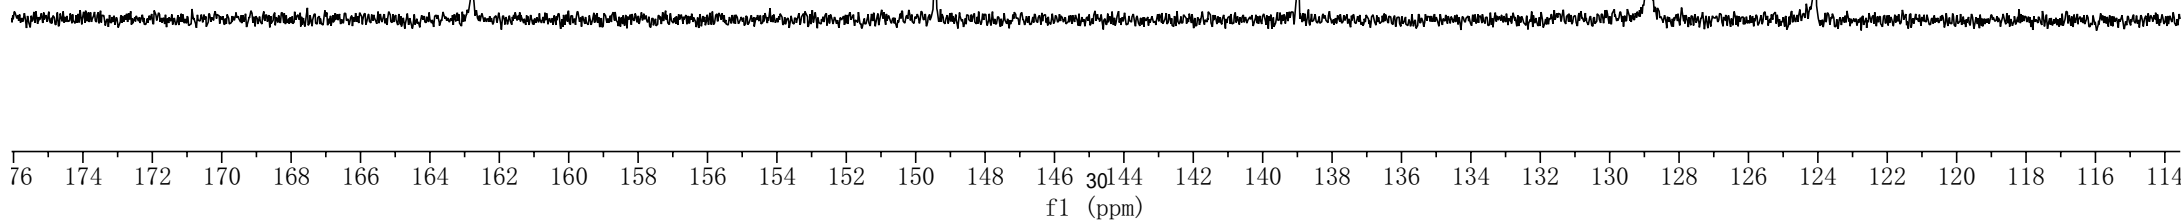

# Qualitative Analysis Report

|                               |              |                      |                      |
|-------------------------------|--------------|----------------------|----------------------|
| <b>Data Filename</b>          | H-3.d        | <b>Sample Name</b>   | H-3                  |
| <b>Sample Type</b>            | Sample       | <b>Position</b>      | P1-D5                |
| <b>Instrument Name</b>        | Instrument 1 | <b>User Name</b>     |                      |
| <b>Acq Method</b>             | FU100-1000.m | <b>Acquired Time</b> | 9/10/2021 8:03:49 PM |
| <b>IRM Calibration Status</b> | Success      | <b>DA Method</b>     | 20170311.m           |
| <b>Comment</b>                |              |                      |                      |

**Sample Group** Info.  
**Acquisition SW** 6200 series TOF/6500 series  
**Version** Q-TOF B.05.01 (B5125.2)

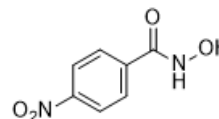

**2d**

## User Spectra

**Fragmentor Voltage** 200      **Collision Energy** 0      **Ionization Mode** ESI

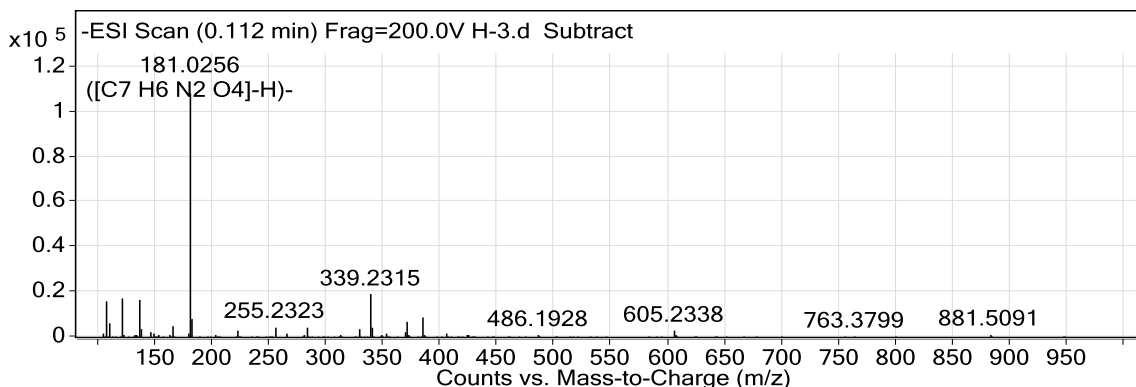

### Peak List

| m/z      | z | Abund     | Formula     | Ion    |
|----------|---|-----------|-------------|--------|
| 107.0374 |   | 16507.06  |             |        |
| 110.9754 |   | 6768.81   |             |        |
| 122.0242 | 1 | 17808.98  |             |        |
| 137.0352 |   | 16820.79  |             |        |
| 166.0154 | 1 | 4909.4    |             |        |
| 181.0256 | 1 | 108351.77 | C7 H6 N2 O4 | (M-H)- |
| 182.0285 | 1 | 8616.11   | C7 H6 N2 O4 | (M-H)- |
| 339.2315 | 1 | 19257.53  |             |        |
| 371.0425 | 1 | 7411.56   |             |        |
| 385.0388 | 1 | 9017.39   |             |        |

### Formula Calculator Element Limits

| Element | Min | Max |
|---------|-----|-----|
| C       | 3   | 60  |
| H       | 0   | 120 |
| O       | 0   | 30  |
| N       | 0   | 30  |
| Cl      | 0   | 0   |
| F       | 0   | 0   |
| S       | 0   | 0   |
| Br      | 0   | 0   |

### Formula Calculator Results

| Formula     | Best | Mass     | Tgt Mass | Diff (ppm) | Ion Species | Score |
|-------------|------|----------|----------|------------|-------------|-------|
| C7 H6 N2 O4 | TRUE | 182.0329 | 182.0328 | -0.79      | C7 H5 N2 O4 | 99.78 |

--- End Of Report ---

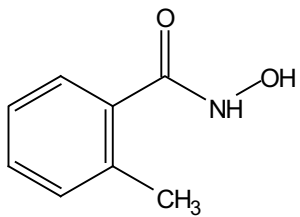

**2e**

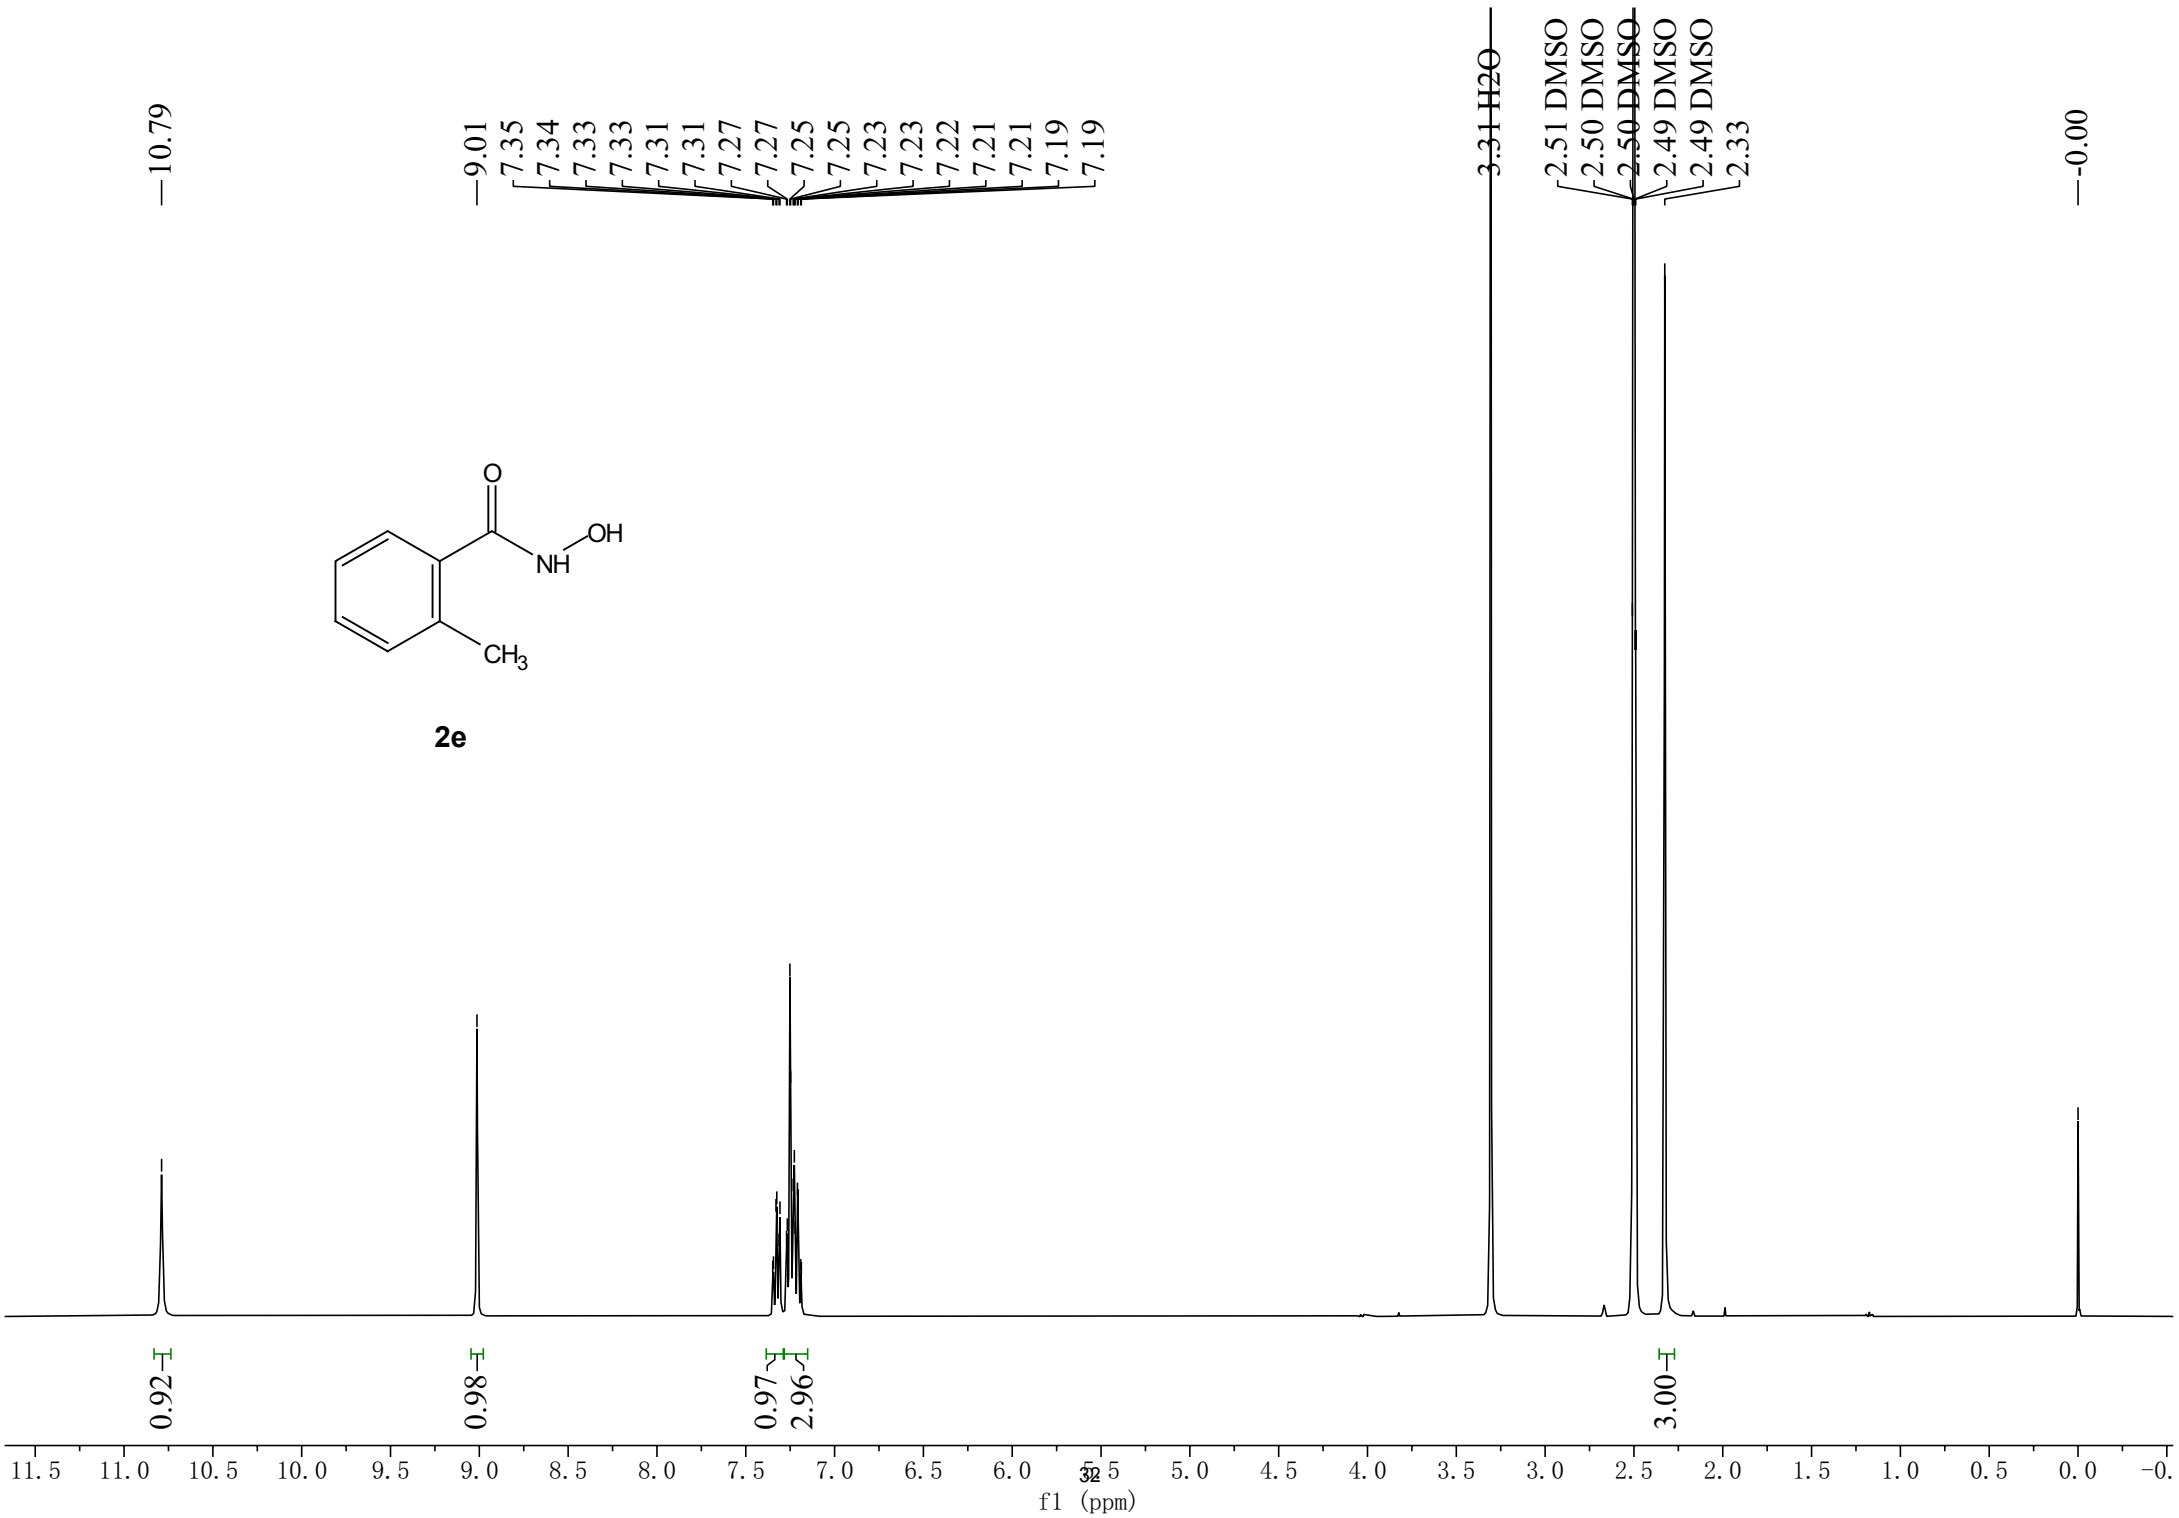



—166.62

136.17  
135.19  
130.89  
129.96  
127.80  
125.96

—19.65

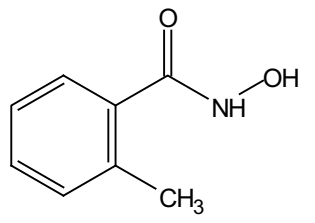

**2e**

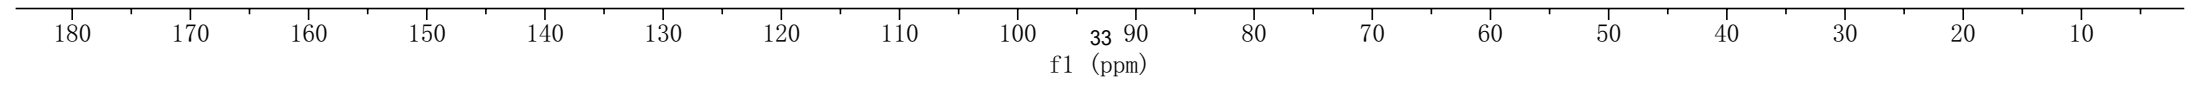

# Qualitative Analysis Report

|                               |              |                      |                      |
|-------------------------------|--------------|----------------------|----------------------|
| <b>Data Filename</b>          | H-2.d        | <b>Sample Name</b>   | H-2                  |
| <b>Sample Type</b>            | Sample       | <b>Position</b>      | P1-D4                |
| <b>Instrument Name</b>        | Instrument 1 | <b>User Name</b>     |                      |
| <b>Acq Method</b>             | FU100-1000.m | <b>Acquired Time</b> | 9/10/2021 8:00:53 PM |
| <b>IRM Calibration Status</b> | Success      | <b>DA Method</b>     | 20170311.m           |
| <b>Comment</b>                |              |                      |                      |

**Sample Group** Info.  
**Acquisition SW** 6200 series TOF/6500 series  
**Version** Q-TOF B.05.01 (B5125.2)

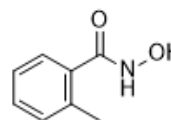

**2e**

## User Spectra

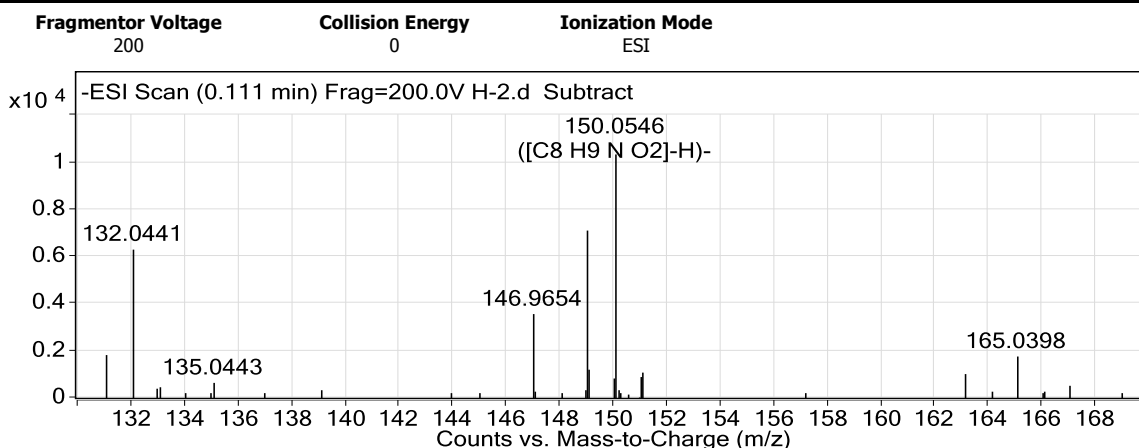

### Peak List

| m/z      | z | Abund    | Formula    | Ion    |
|----------|---|----------|------------|--------|
| 110.975  |   | 8981.68  |            |        |
| 132.0441 | 1 | 6324.56  |            |        |
| 149.0093 | 1 | 7136.8   |            |        |
| 150.0546 | 1 | 10366.55 | C8 H9 N O2 | (M-H)- |
| 223.0276 | 1 | 12277.13 |            |        |
| 255.2311 | 1 | 10070.78 |            |        |
| 283.2625 | 1 | 11510.82 |            |        |
| 339.2305 | 1 | 71667.88 |            |        |
| 340.2335 | 1 | 16580.31 |            |        |
| 423.2006 | 1 | 5804.8   |            |        |

### Formula Calculator Element Limits

| Element | Min | Max |
|---------|-----|-----|
| C       | 3   | 60  |
| H       | 0   | 120 |
| O       | 0   | 30  |
| N       | 0   | 30  |
| Cl      | 0   | 0   |
| F       | 0   | 0   |
| S       | 0   | 0   |
| Br      | 0   | 0   |

### Formula Calculator Results

| Formula    | Best | Mass     | Tgt Mass | Diff (ppm) | Ion Species | Score |
|------------|------|----------|----------|------------|-------------|-------|
| C8 H9 N O2 | TRUE | 151.0618 | 151.0633 | 9.96       | C8 H8 N O2  | 74.98 |

--- End Of Report ---

—10.9978

—9.2437

7.6420  
7.6290  
7.6164  
7.6033  
7.3651  
7.3611  
7.3471  
7.3319  
7.3281  
7.1848  
7.1807  
7.1709  
7.1667  
7.1567  
7.1525

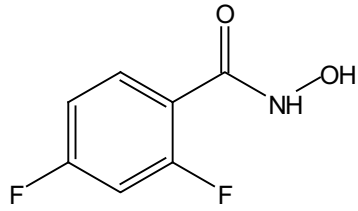

**2f**

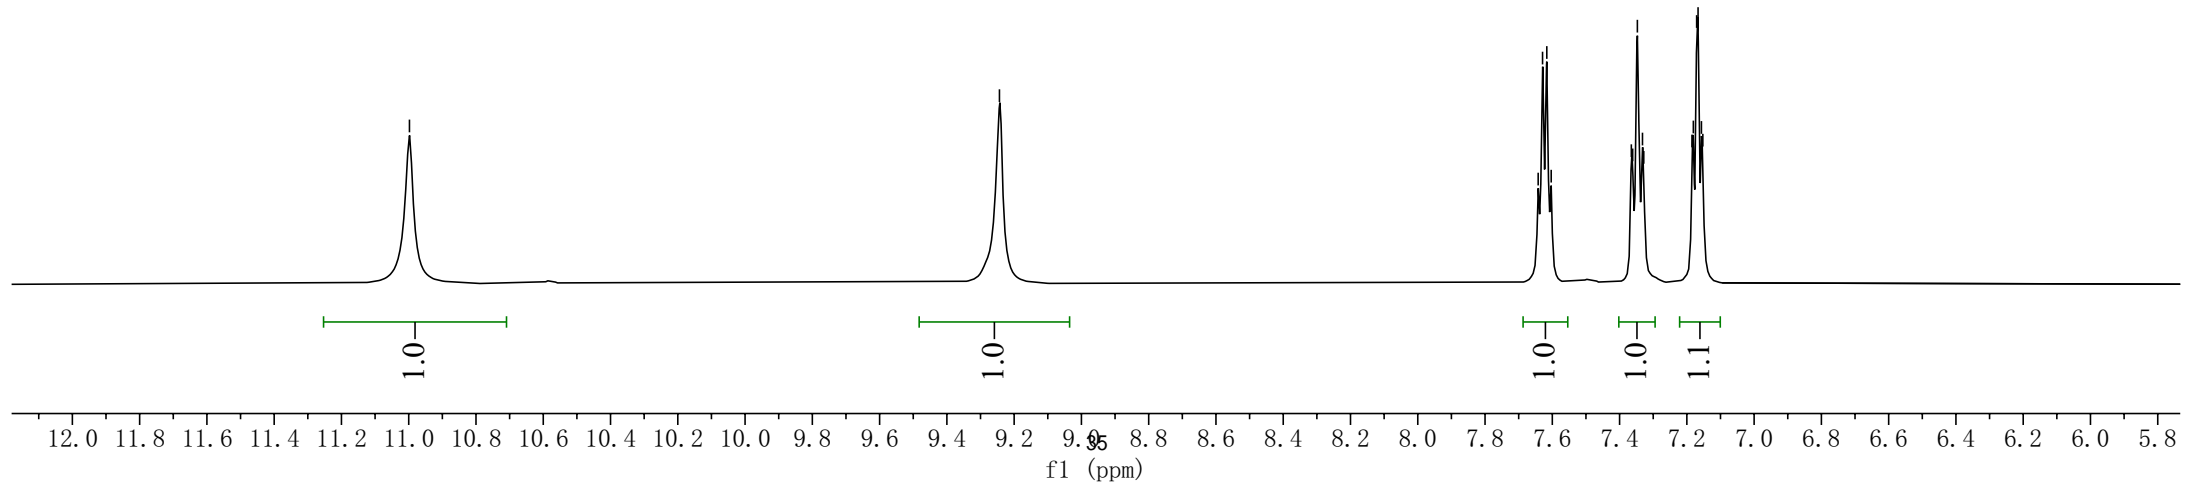

164.55  
164.47  
162.90  
162.82  
160.91  
160.83  
160.75  
159.17  
159.08

132.03  
132.00  
131.96  
131.93

119.53  
119.42

112.28  
112.15

105.13  
104.96  
104.79

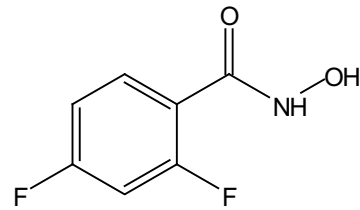

2f

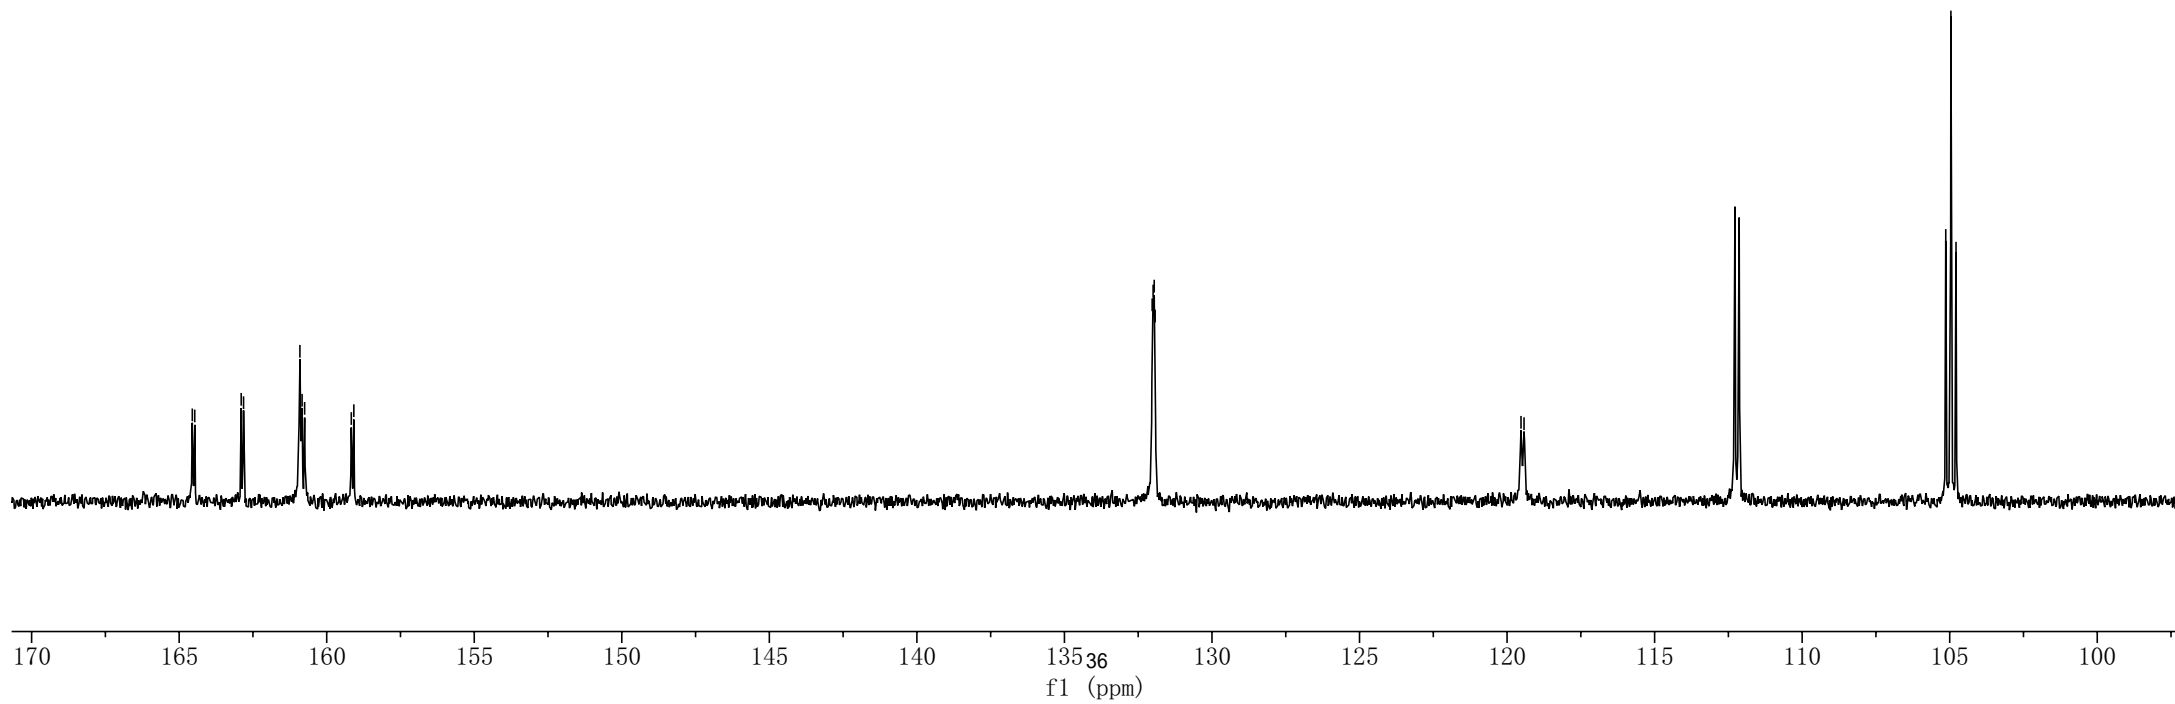

# Qualitative Analysis Report

|                               |              |                      |                      |
|-------------------------------|--------------|----------------------|----------------------|
| <b>Data Filename</b>          | H-7.d        | <b>Sample Name</b>   | H-7                  |
| <b>Sample Type</b>            | Sample       | <b>Position</b>      | P1-D9                |
| <b>Instrument Name</b>        | Instrument 1 | <b>User Name</b>     |                      |
| <b>Acq Method</b>             | FU100-1000.m | <b>Acquired Time</b> | 9/10/2021 8:15:39 PM |
| <b>IRM Calibration Status</b> | Success      | <b>DA Method</b>     | 20170311.m           |
| <b>Comment</b>                |              |                      |                      |

**Sample Group** Info.  
**Acquisition SW** 6200 series TOF/6500 series  
**Version** Q-TOF B.05.01 (B5125.2)

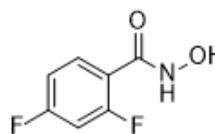

**2f**

## User Spectra

**Fragmentor Voltage** 200      **Collision Energy** 0      **Ionization Mode** ESI

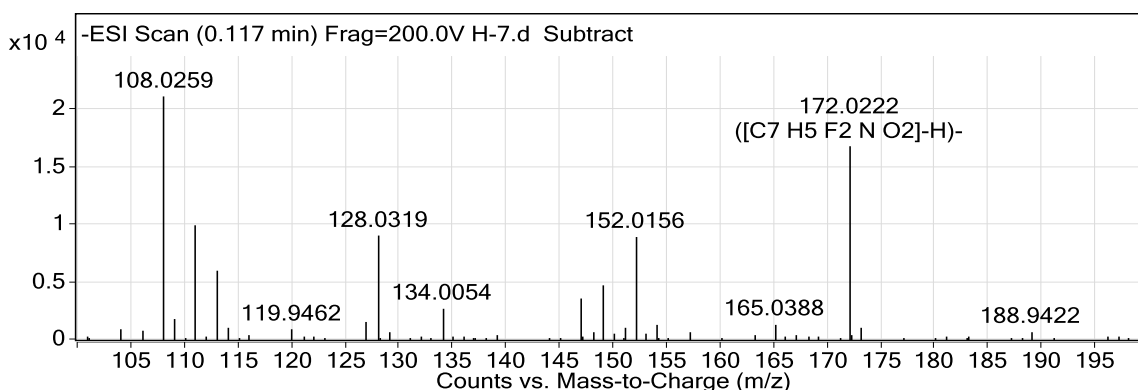

### Peak List

| m/z      | z | Abund    | Formula       | Ion    |
|----------|---|----------|---------------|--------|
| 108.0259 | 1 | 21215.55 |               |        |
| 110.976  |   | 10067.43 |               |        |
| 128.0319 | 1 | 9111.13  |               |        |
| 152.0156 | 1 | 9030.54  |               |        |
| 172.0222 | 1 | 16847.09 | C7 H5 F2 N O2 | (M-H)- |
| 223.0294 | 1 | 7639.98  |               |        |
| 255.2331 | 1 | 7922.67  |               |        |
| 283.2647 | 1 | 7155.33  |               |        |
| 339.2336 | 1 | 18010.52 |               |        |
| 423.2043 | 1 | 7402.89  |               |        |

### Formula Calculator Element Limits

| Element | Min | Max |
|---------|-----|-----|
| C       | 3   | 60  |
| H       | 0   | 120 |
| O       | 0   | 30  |
| N       | 0   | 30  |
| Cl      | 0   | 0   |
| F       | 2   | 2   |
| S       | 0   | 0   |
| Br      | 0   | 0   |

### Formula Calculator Results

| Formula       | Best | Mass     | Tgt Mass | Diff (ppm) | Ion Species   | Score |
|---------------|------|----------|----------|------------|---------------|-------|
| C7 H5 F2 N O2 | TRUE | 173.0295 | 173.0288 | -3.73      | C7 H4 F2 N O2 | 84.43 |

--- End Of Report ---

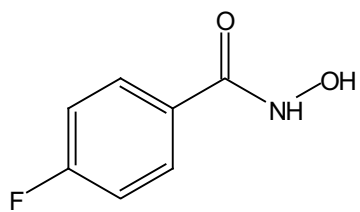

2g

—11.2381

—9.0562

7.8360  
7.8310  
7.8271  
7.8216  
7.8166  
7.8103  
7.8070  
7.8018  
7.3097  
7.3047  
7.3009  
7.2940  
7.2896  
7.2786  
7.2751

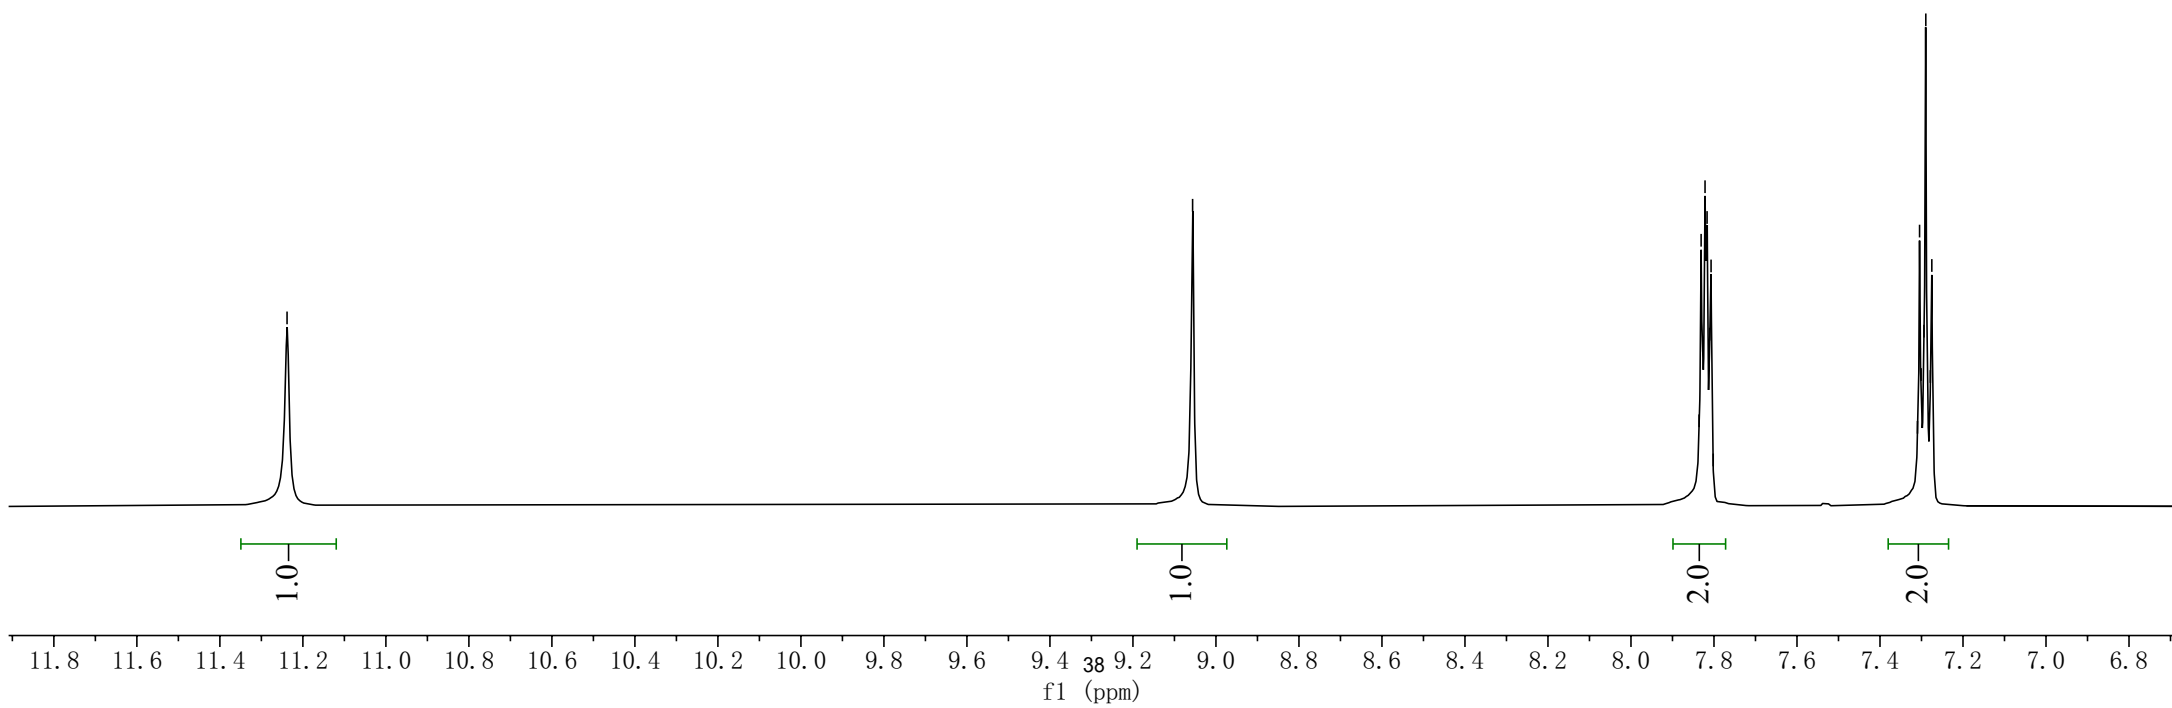

164.9849  
163.6069  
163.3399

129.8699  
129.8086  
129.6359

115.8070  
115.6590

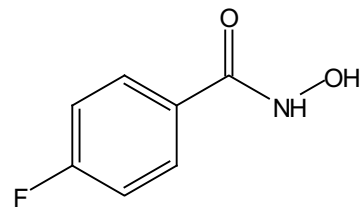

2g

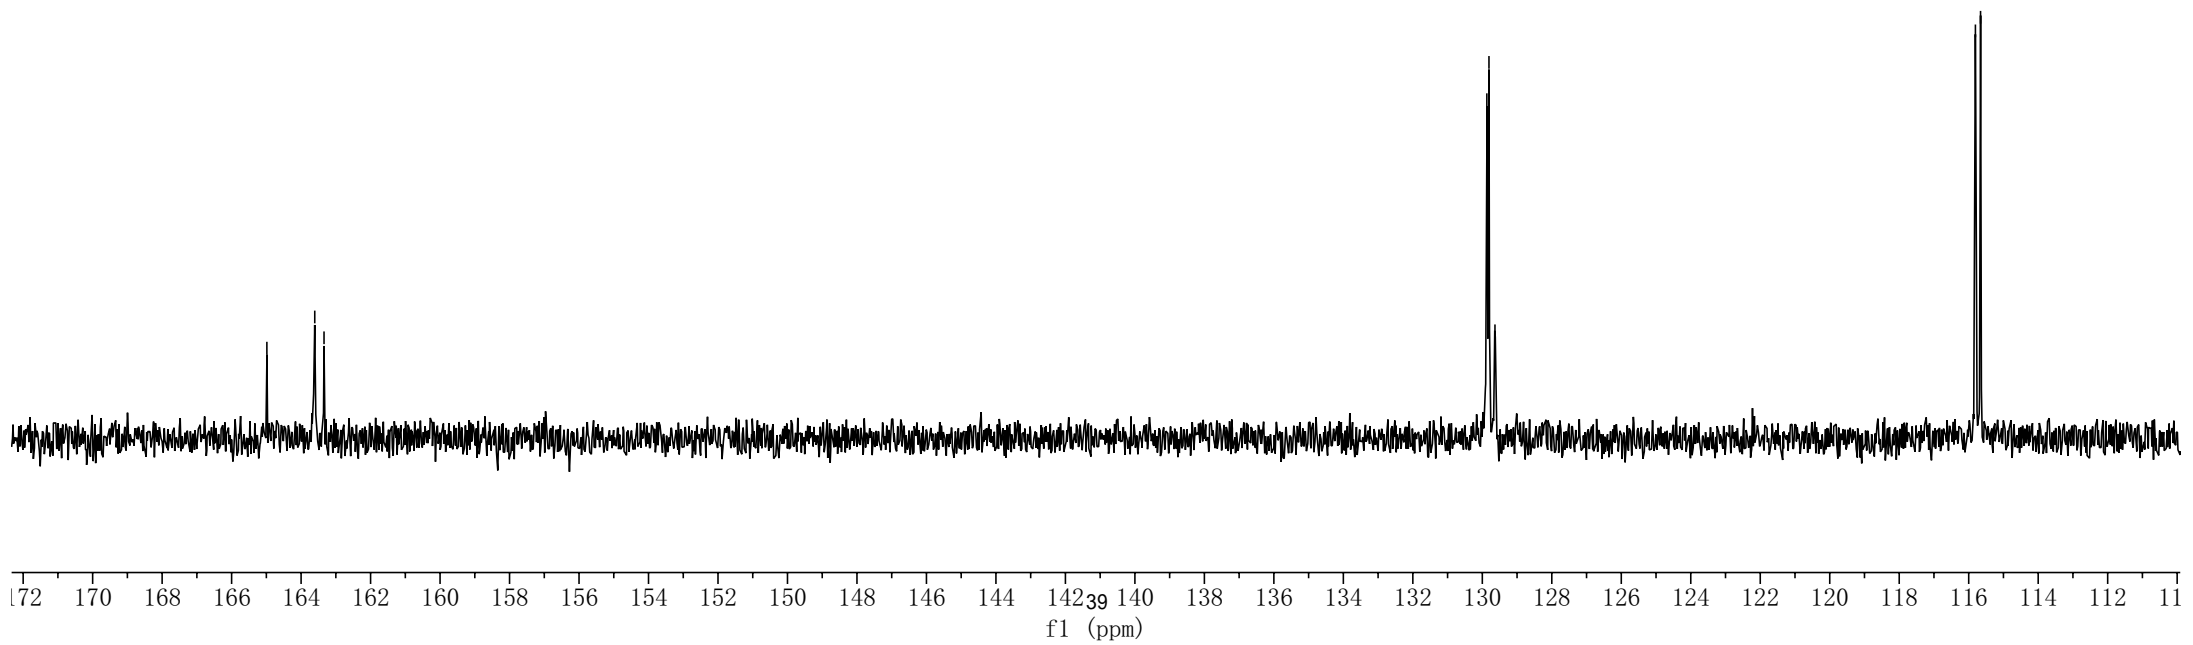

# Qualitative Analysis Report

|                               |              |                      |                      |
|-------------------------------|--------------|----------------------|----------------------|
| <b>Data Filename</b>          | H-26.d       | <b>Sample Name</b>   | H-26                 |
| <b>Sample Type</b>            | Sample       | <b>Position</b>      | P1-C4                |
| <b>Instrument Name</b>        | Instrument 1 | <b>User Name</b>     |                      |
| <b>Acq Method</b>             | FU100-1000.m | <b>Acquired Time</b> | 9/24/2021 8:26:28 PM |
| <b>IRM Calibration Status</b> | Success      | <b>DA Method</b>     | 20170311.m           |
| <b>Comment</b>                |              |                      |                      |

|                               |                                                        |
|-------------------------------|--------------------------------------------------------|
| <b>Sample Group</b>           | Info.                                                  |
| <b>Acquisition SW Version</b> | 6200 series TOF/6500 series<br>Q-TOF B.05.01 (B5125.2) |

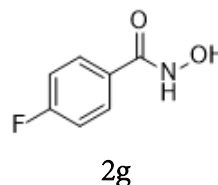

## User Spectra

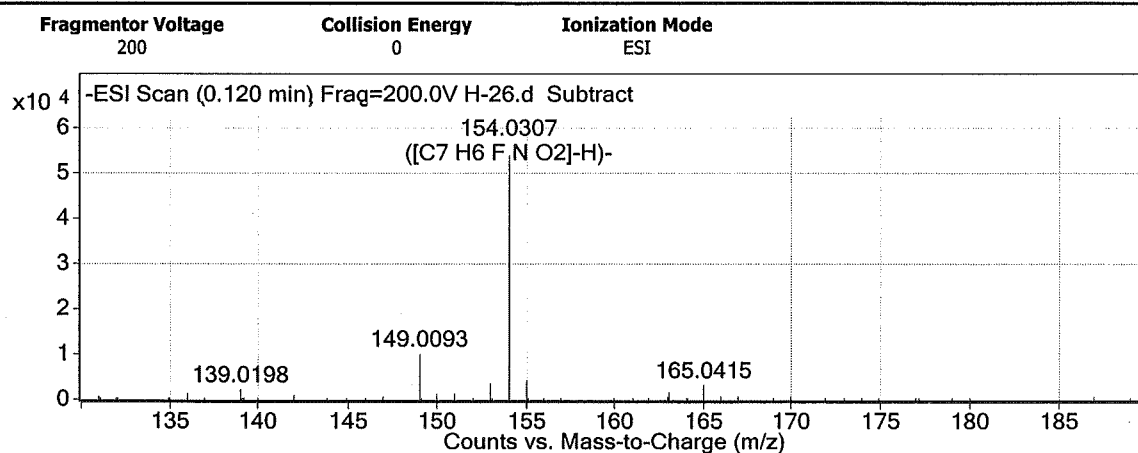

### Peak List

| m/z      | z | Abund    | Formula      | Ion    |
|----------|---|----------|--------------|--------|
| 110.0404 | 1 | 27017.95 |              |        |
| 149.0093 | 1 | 10130.84 |              |        |
| 154.0307 | 1 | 53809.39 | C7 H6 F N O2 | (M-H)- |
| 223.0277 | 1 | 19997.59 |              |        |
| 225.0116 | 1 | 7004.46  |              |        |
| 339.231  | 1 | 76293.7  |              |        |
| 340.2341 | 1 | 17598.61 |              |        |
| 353.2092 | 1 | 7985.72  |              |        |
| 423.2011 | 1 | 8479.23  |              |        |
| 424.2834 | 1 | 16759    |              |        |

### Formula Calculator Element Limits

| Element | Min | Max |
|---------|-----|-----|
| C       | 3   | 60  |
| H       | 0   | 120 |
| O       | 0   | 30  |
| N       | 0   | 30  |
| F       | 1   | 1   |

### Formula Calculator Results

| Formula      | Best | Mass     | Tgt Mass | Diff (ppm) | Ion Species  | Score |
|--------------|------|----------|----------|------------|--------------|-------|
| C7 H6 F N O2 | TRUE | 155.0379 | 155.0383 | 2.24       | C7 H5 F N O2 | 98.6  |

--- End Of Report ---



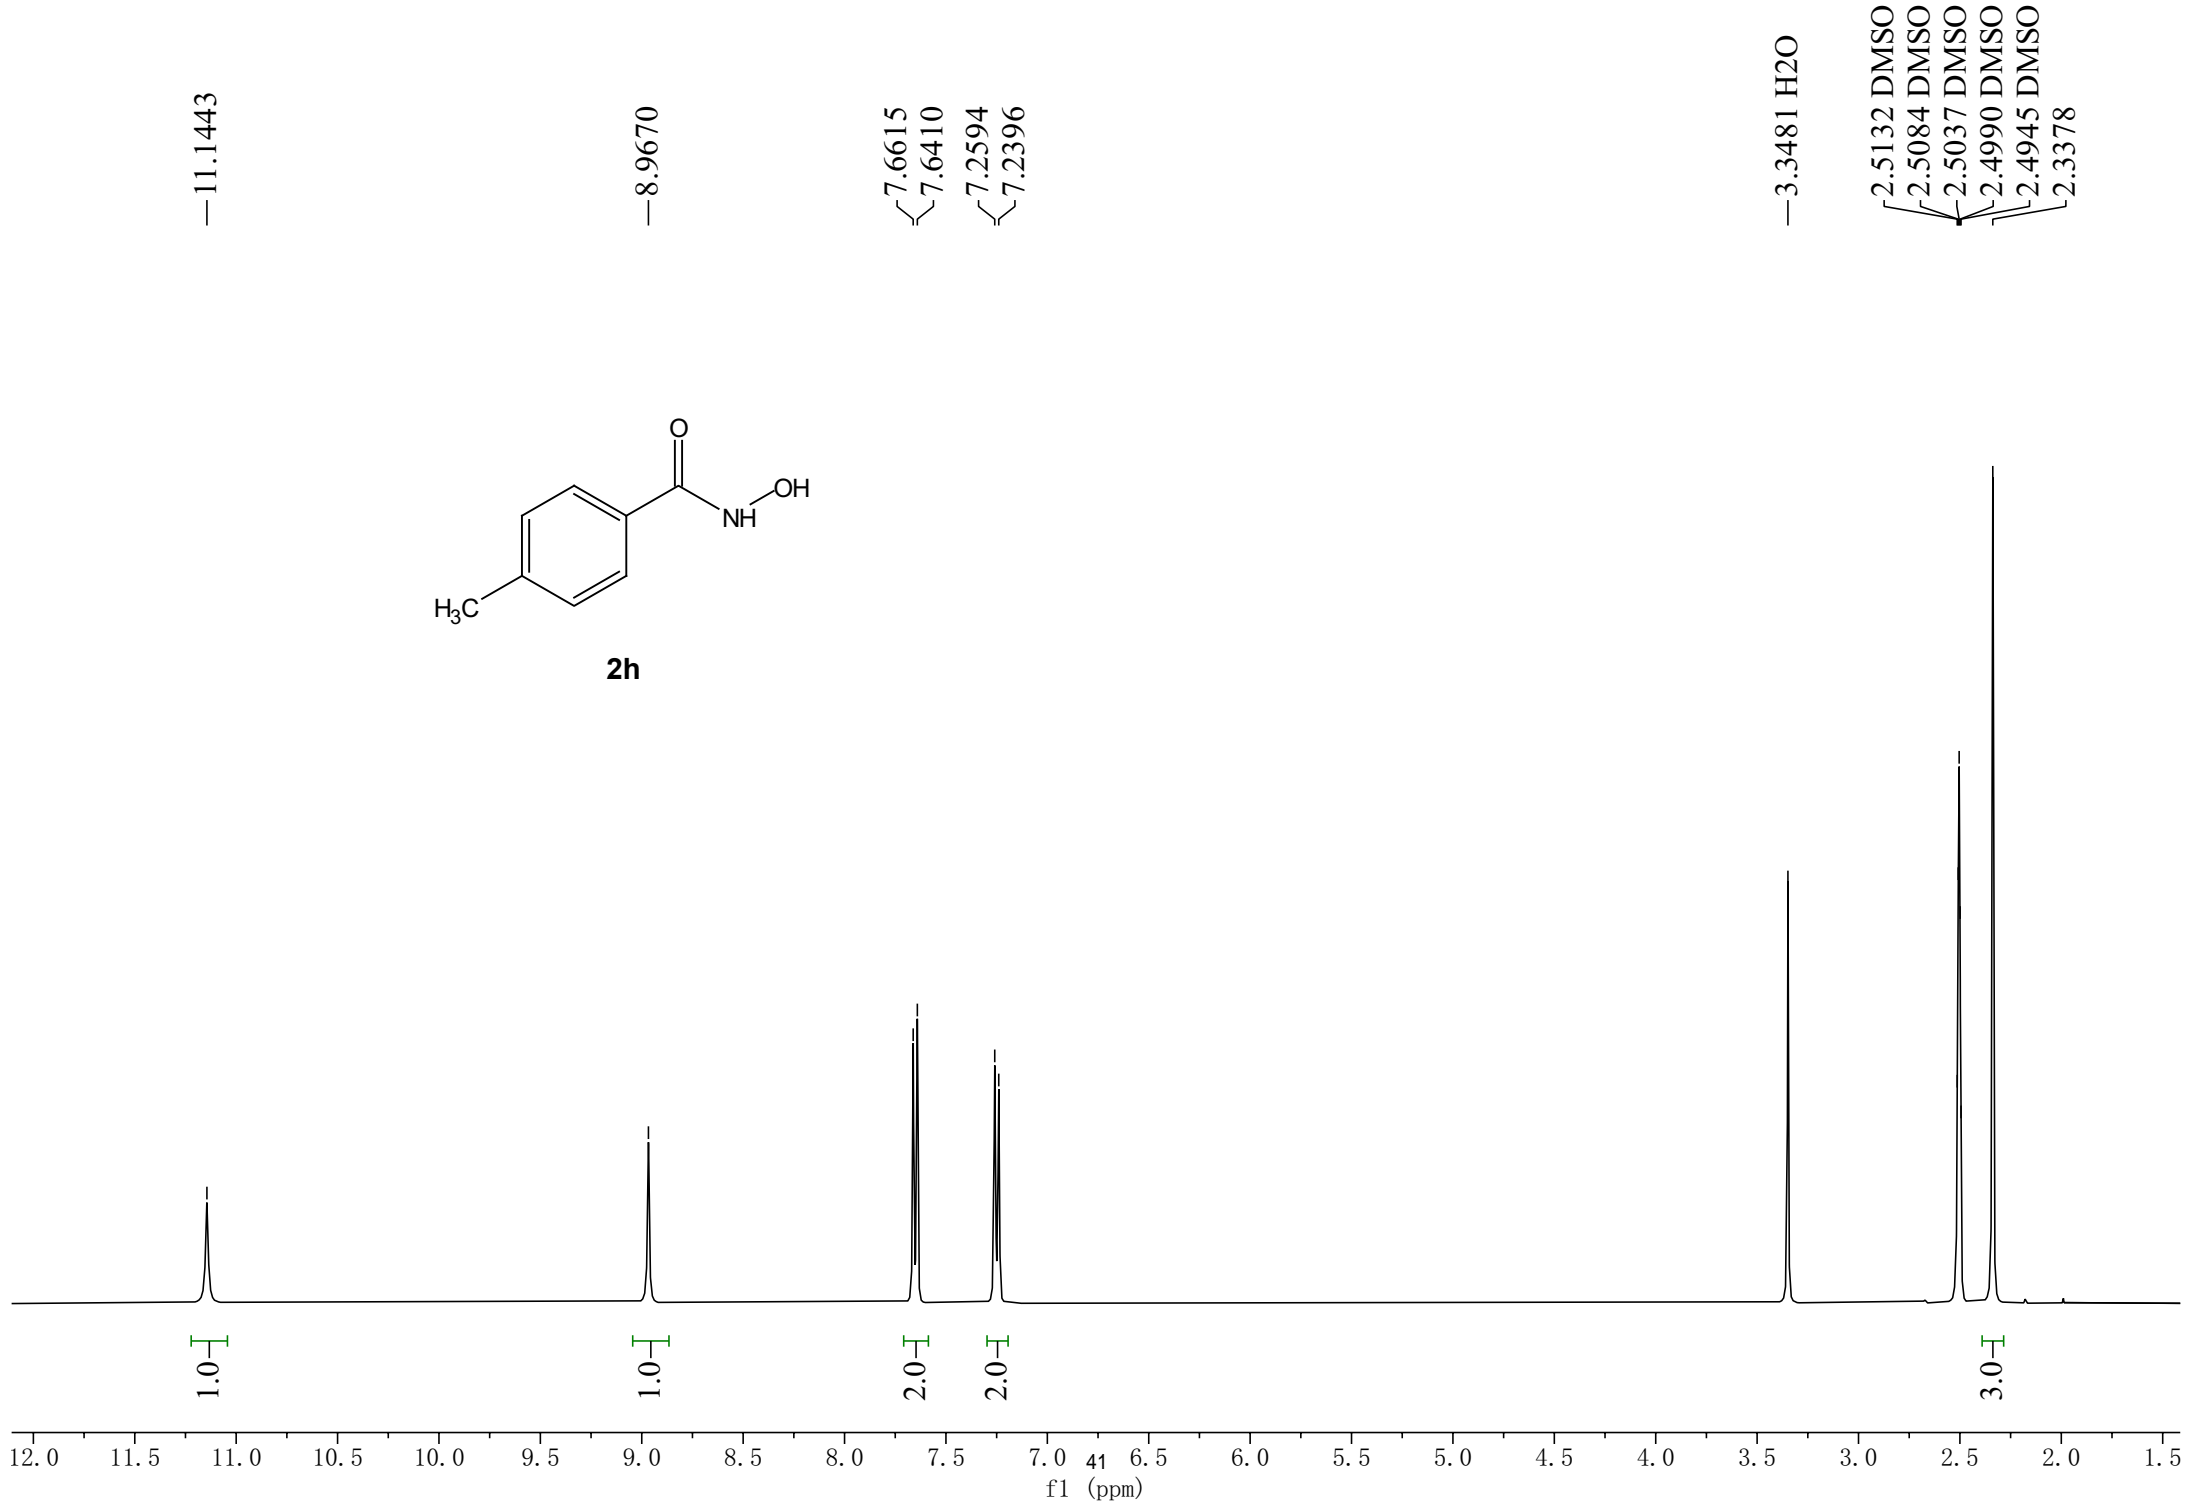

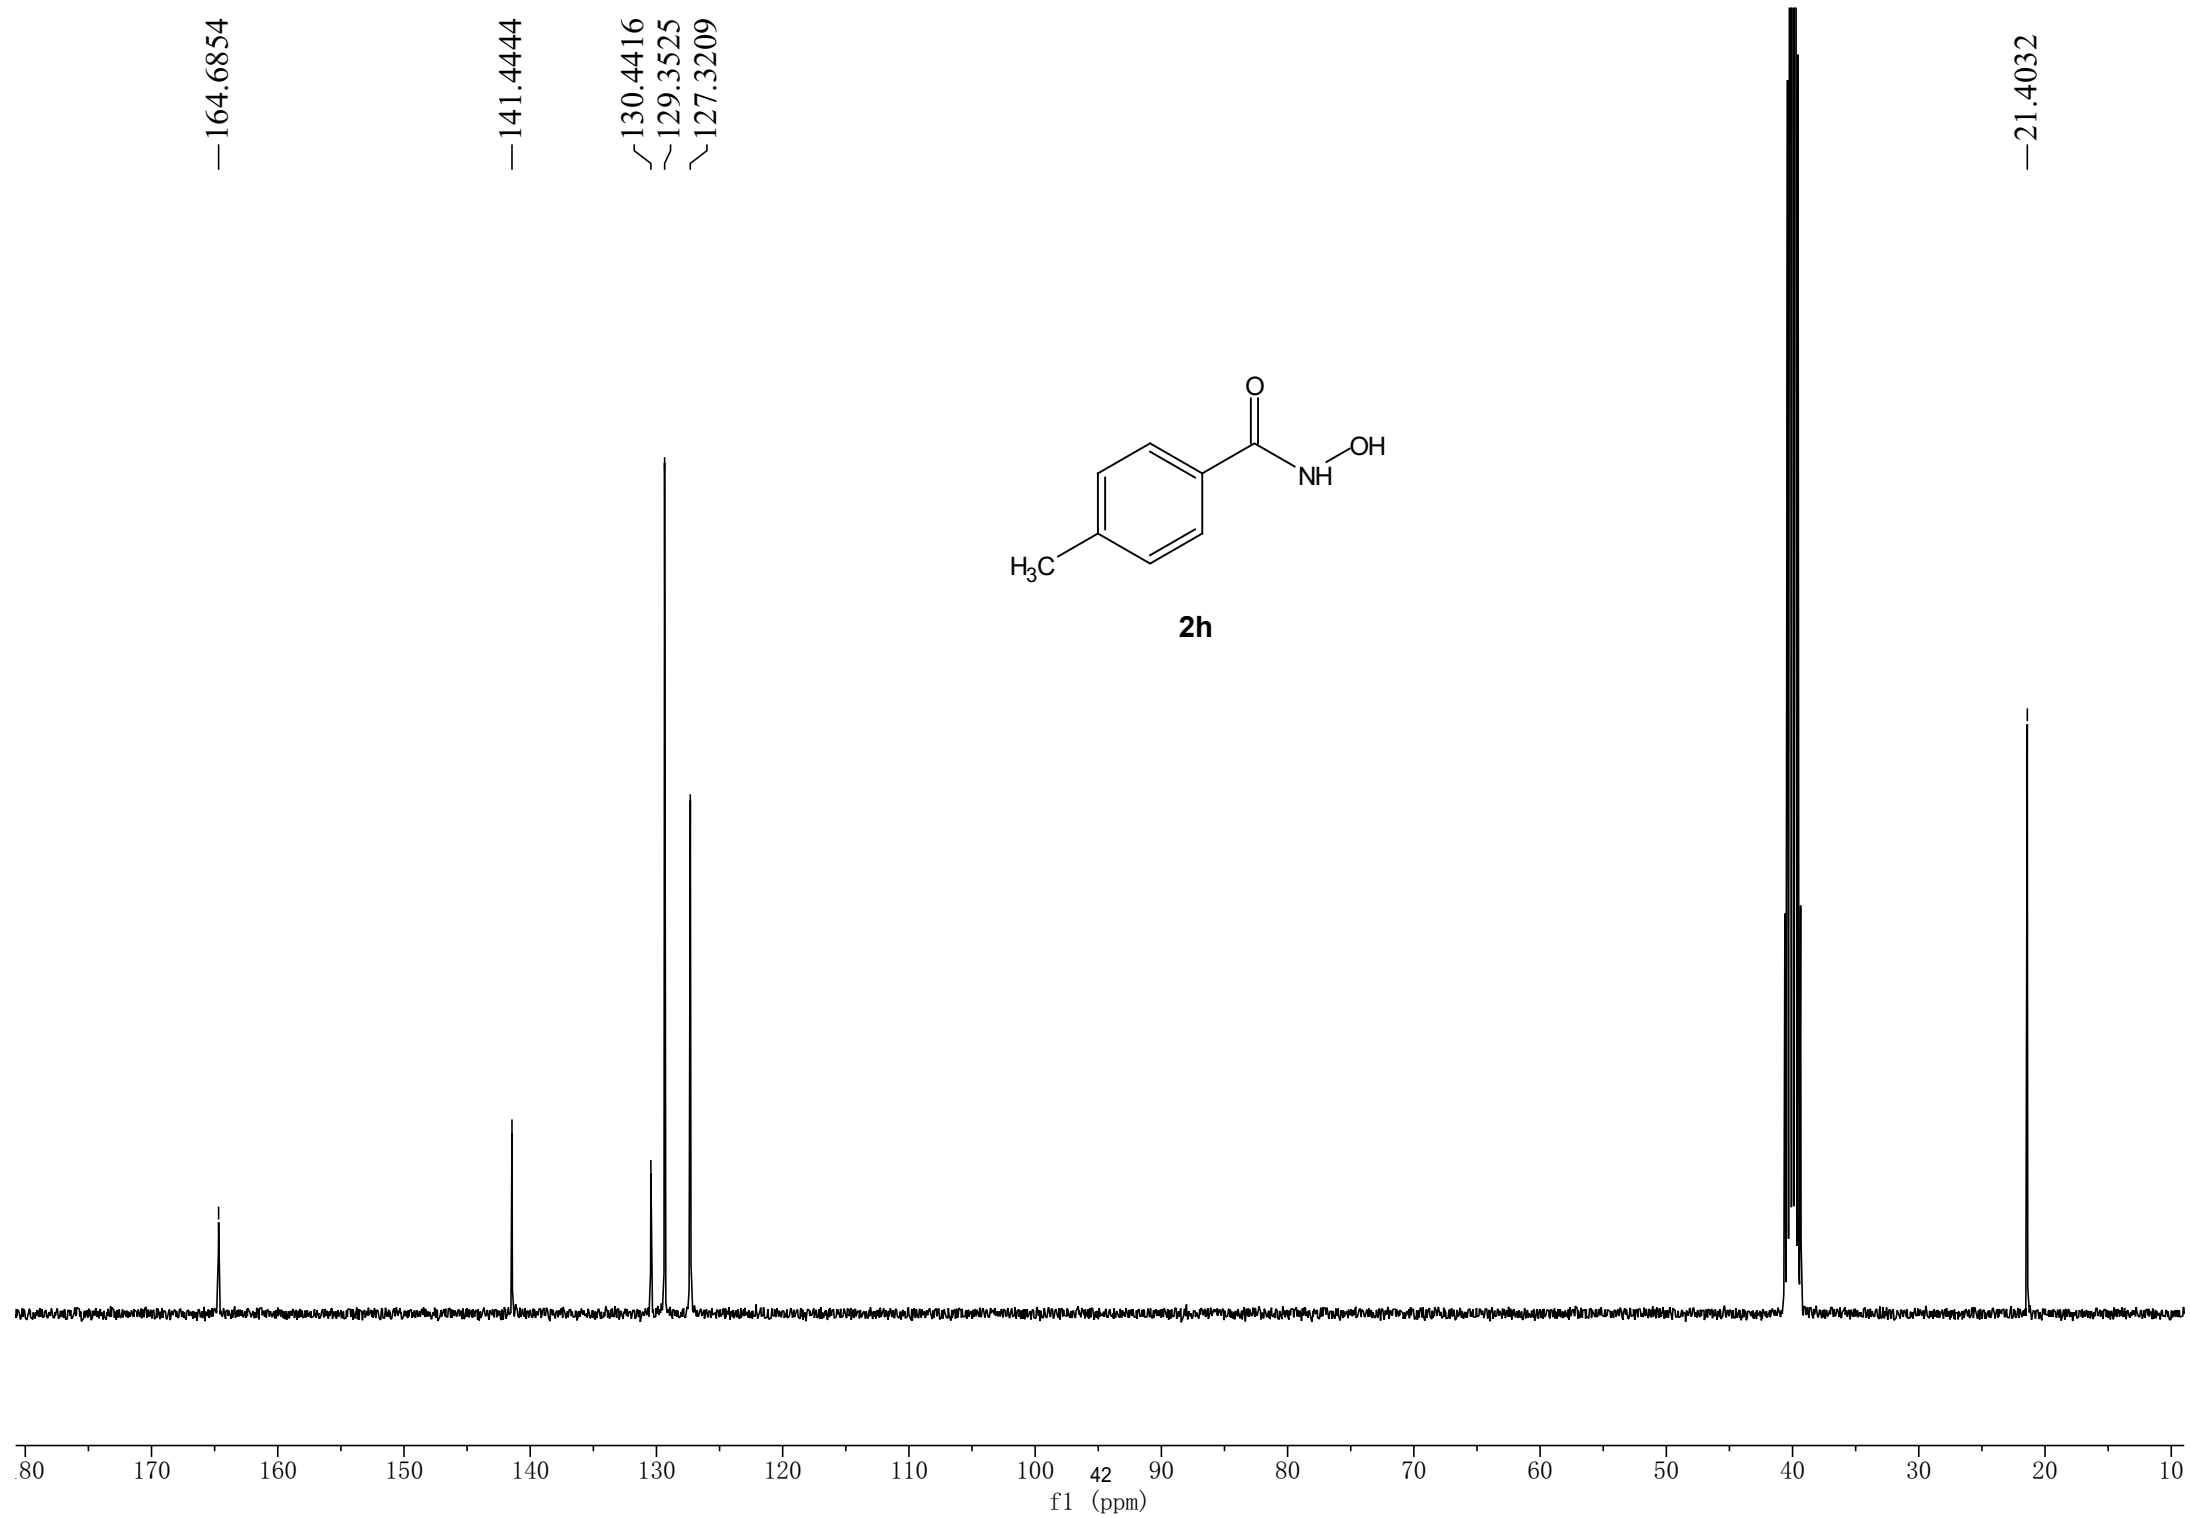

# Qualitative Analysis Report

|                               |              |                      |                      |
|-------------------------------|--------------|----------------------|----------------------|
| <b>Data Filename</b>          | H-27.d       | <b>Sample Name</b>   | H-27                 |
| <b>Sample Type</b>            | Sample       | <b>Position</b>      | P1-B1                |
| <b>Instrument Name</b>        | Instrument 1 | <b>User Name</b>     |                      |
| <b>Acq Method</b>             | FU100-1000.m | <b>Acquired Time</b> | 1/6/2022 10:06:48 AM |
| <b>IRM Calibration Status</b> | Success      | <b>DA Method</b>     | 20170311.m           |
| <b>Comment</b>                |              |                      |                      |

|                               |                                                        |              |
|-------------------------------|--------------------------------------------------------|--------------|
| <b>Sample Group</b>           |                                                        | <b>Info.</b> |
| <b>Acquisition SW Version</b> | 6200 series TOF/6500 series<br>Q-TOF B.05.01 (B5125.2) |              |

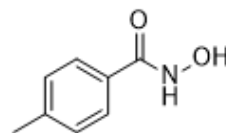

## User Spectra

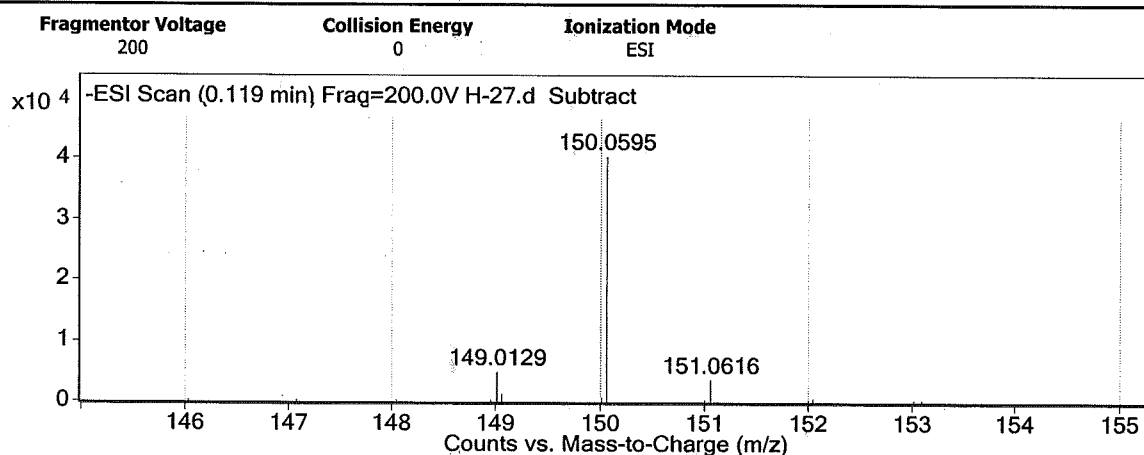

### Peak List

| m/z      | z | Abund     |
|----------|---|-----------|
| 106.0686 | 1 | 32083.81  |
| 150.0595 | 1 | 40359.3   |
| 339.2373 | 1 | 1012222   |
| 340.2406 | 1 | 238964.38 |
| 341.243  | 1 | 28280.03  |
| 353.2163 | 1 | 46349.3   |
| 369.2475 | 1 | 40906.86  |
| 415.2356 | 1 | 28253.72  |
| 424.2903 | 1 | 237418.89 |
| 425.2929 | 1 | 63363.42  |

### Formula Calculator Element Limits

| Element | Min | Max |
|---------|-----|-----|
| C       | 3   | 60  |
| H       | 0   | 120 |
| O       | 0   | 30  |
| N       | 0   | 30  |
| Br      | 1   | 1   |

--- End Of Report ---

—10.93

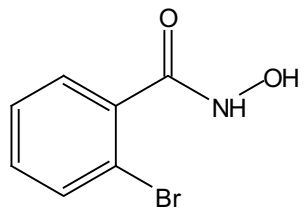

**2i**

—9.20

7.67  
7.67  
7.65  
7.65  
7.65

7.43  
7.42  
7.41  
7.41  
7.39  
7.37  
7.37  
7.35  
7.35

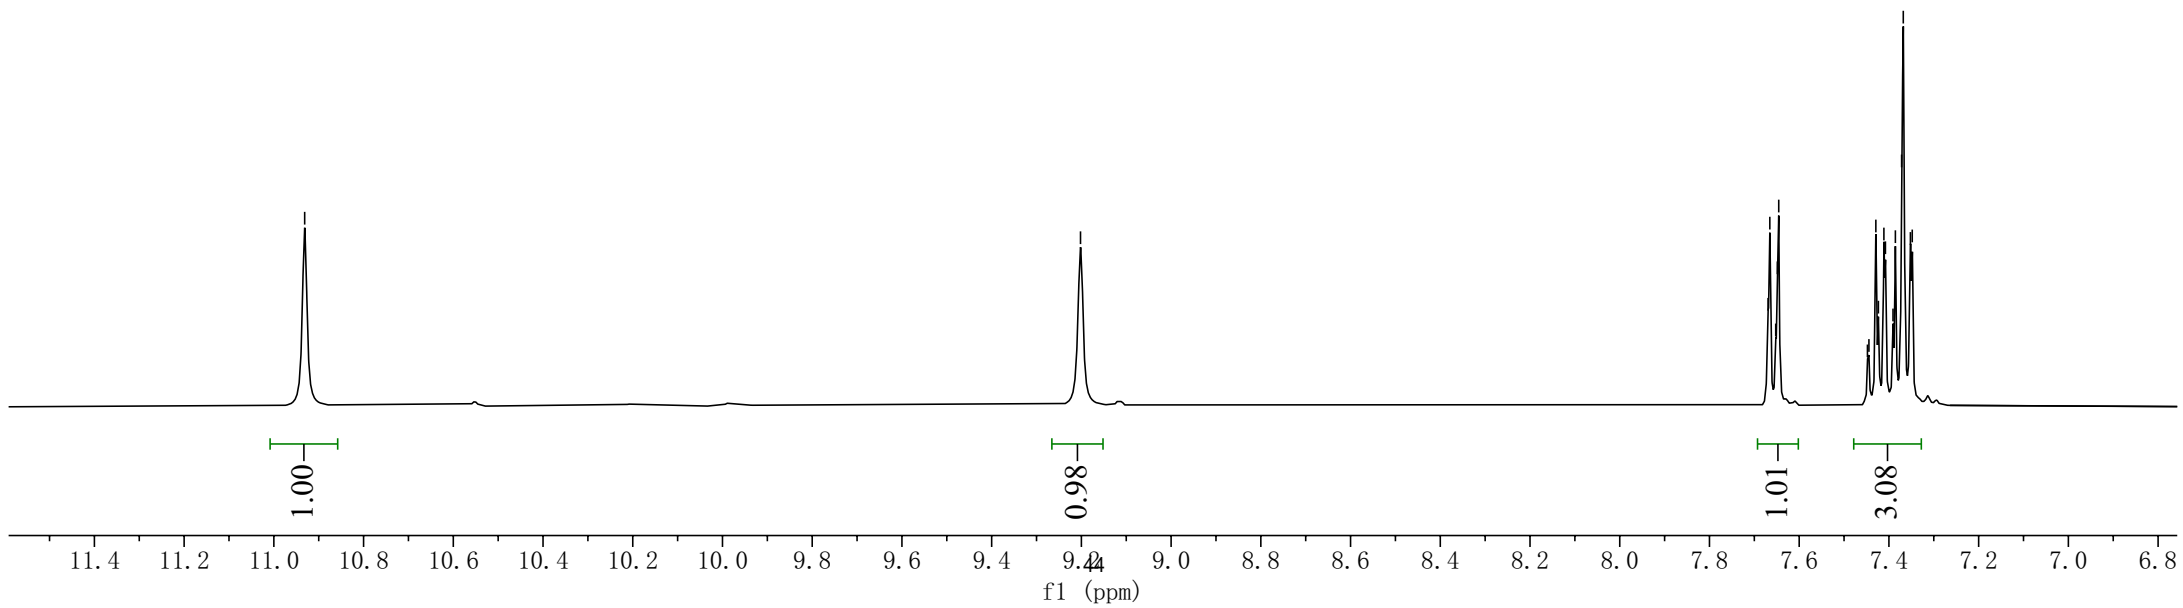

—164.60

—137.21

—133.28

—131.69

—129.84

—128.04

—120.21

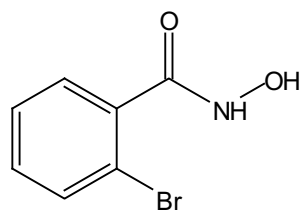

**2i**

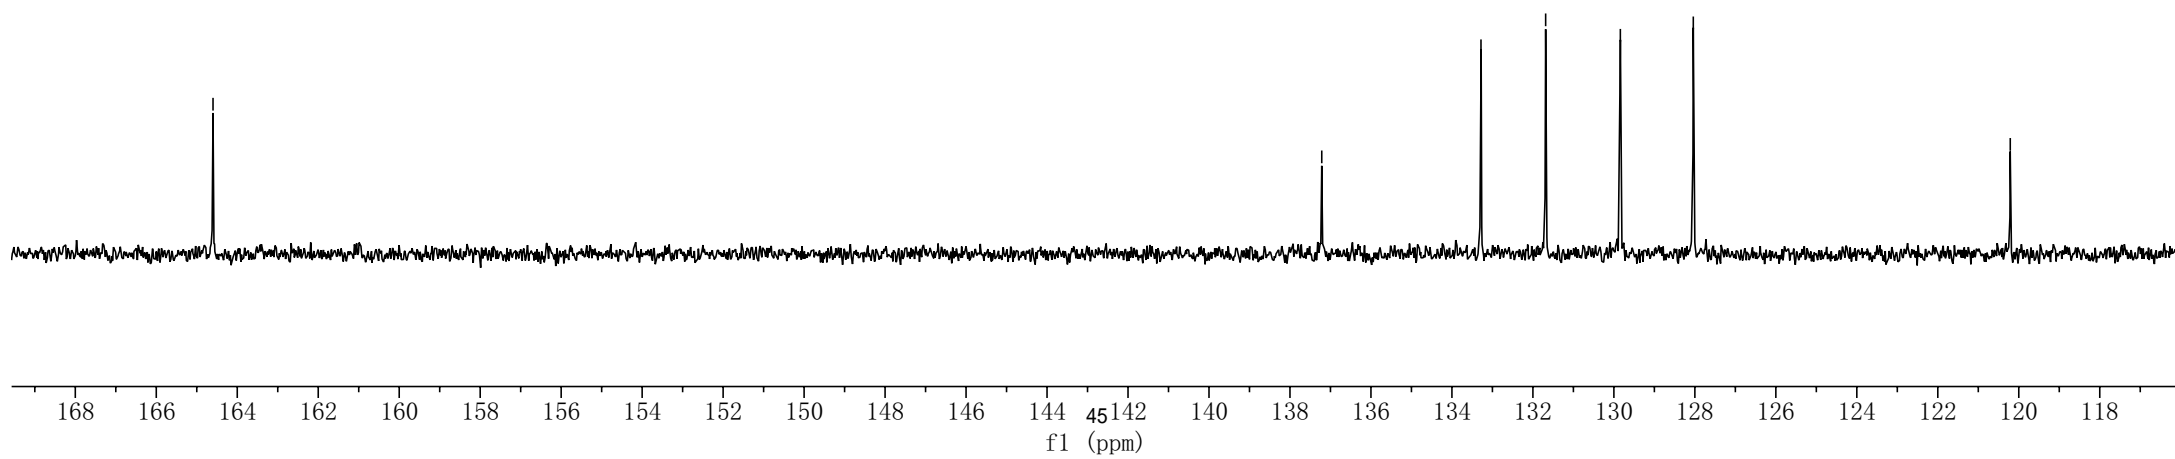

# Qualitative Analysis Report

**Data Filename** H-15.d **Sample Name** H-15  
**Sample Type** Sample **Position** P1-E8  
**Instrument Name** Instrument 1 **User Name**  
**Acq Method** FU100-1000.m **Acquired Time** 9/10/2021 8:39:09 PM  
**IRM Calibration Status** Success **DA Method** 20170311.m  
**Comment**

**Sample Group** **Info.**  
**Acquisition SW** 6200 series TOF/6500 series  
**Version** Q-TOF B.05.01 (B5125.2)

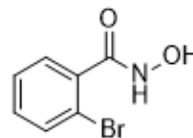

**2i**

## User Spectra

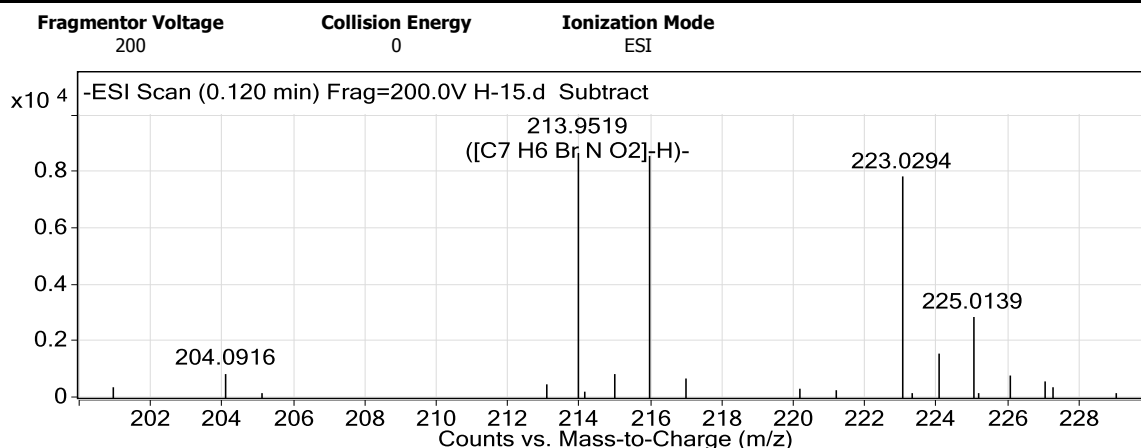

## Peak List

| m/z      | z | Abund    | Formula       | Ion    |
|----------|---|----------|---------------|--------|
| 110.9762 |   | 8395.81  |               |        |
| 213.9519 | 1 | 8680.39  | C7 H6 Br N O2 | (M-H)- |
| 215.95   | 1 | 8580.45  | C7 H6 Br N O2 | (M-H)- |
| 223.0294 | 1 | 7856.88  |               |        |
| 255.234  | 1 | 9644.34  |               |        |
| 283.2653 | 1 | 10117.29 |               |        |
| 339.234  | 1 | 80781.76 |               |        |
| 340.2366 | 1 | 19066.68 |               |        |
| 424.284  | 1 | 5476.01  |               |        |
| 459.3255 | 1 | 6645.28  |               |        |

## Formula Calculator Element Limits

| Element | Min | Max |
|---------|-----|-----|
| C       | 3   | 60  |
| H       | 0   | 120 |
| O       | 0   | 30  |
| N       | 0   | 30  |
| Cl      | 0   | 0   |
| F       | 0   | 0   |
| Br      | 1   | 1   |

## Formula Calculator Results

| Formula       | Best | Mass     | Tgt Mass | Diff (ppm) | Ion Species   | Score |
|---------------|------|----------|----------|------------|---------------|-------|
| C7 H6 Br N O2 | TRUE | 214.9593 | 214.9582 | -5.26      | C7 H5 Br N O2 | 93.05 |

--- End Of Report ---

—11.2025

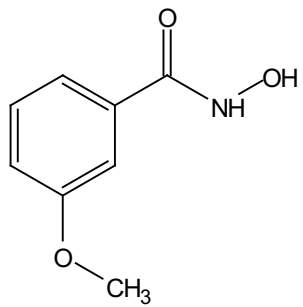

**2j**

9.0320  
7.3750  
7.3621  
7.3490  
7.3362  
7.3340  
7.3318  
7.3237  
7.3212  
7.3190  
7.2988  
7.2951  
7.2920  
7.0875  
7.0854  
7.0829  
7.0810  
7.0743  
7.0723  
7.0697  
7.0677

3.7894

3.3370 H<sub>2</sub>O

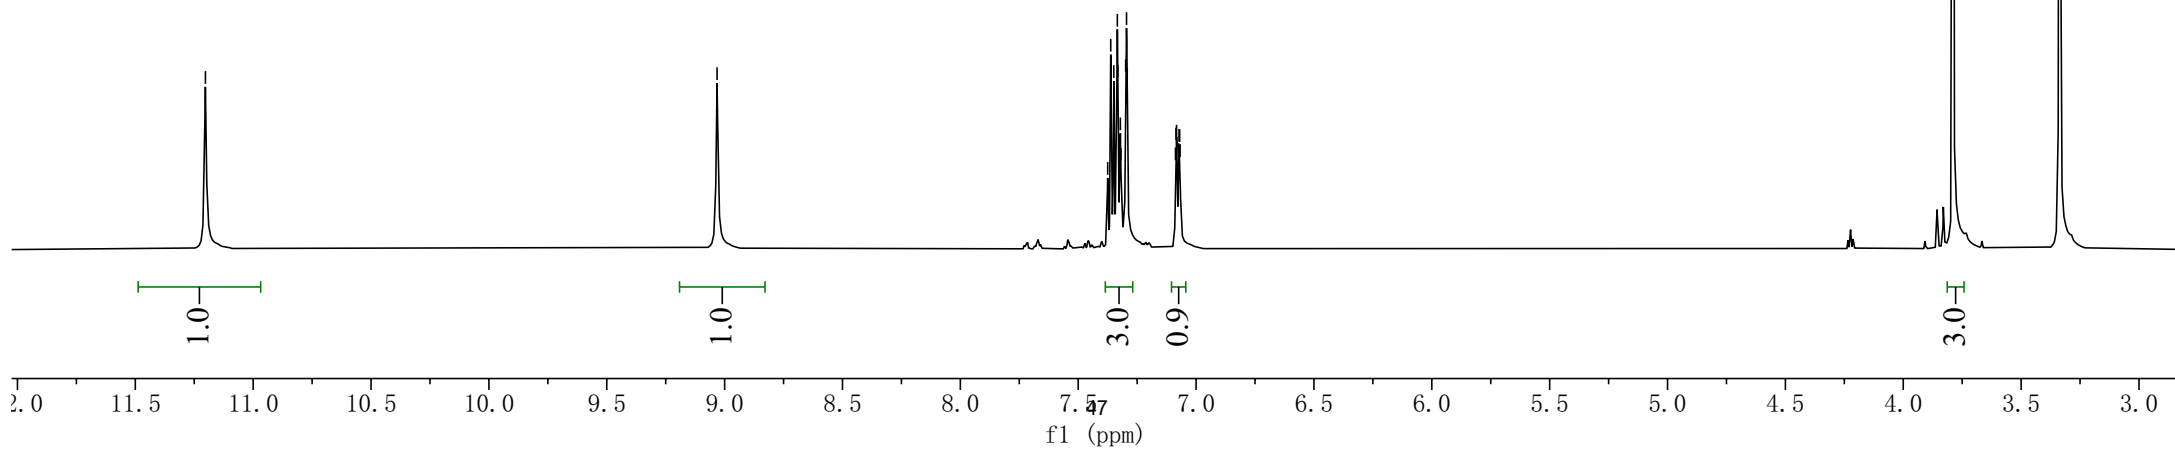

—164.28

—159.52

—134.54

—129.93

—119.44

—117.34

—112.42

—55.60

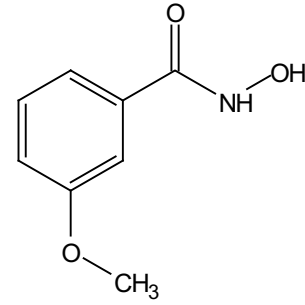

**2j**

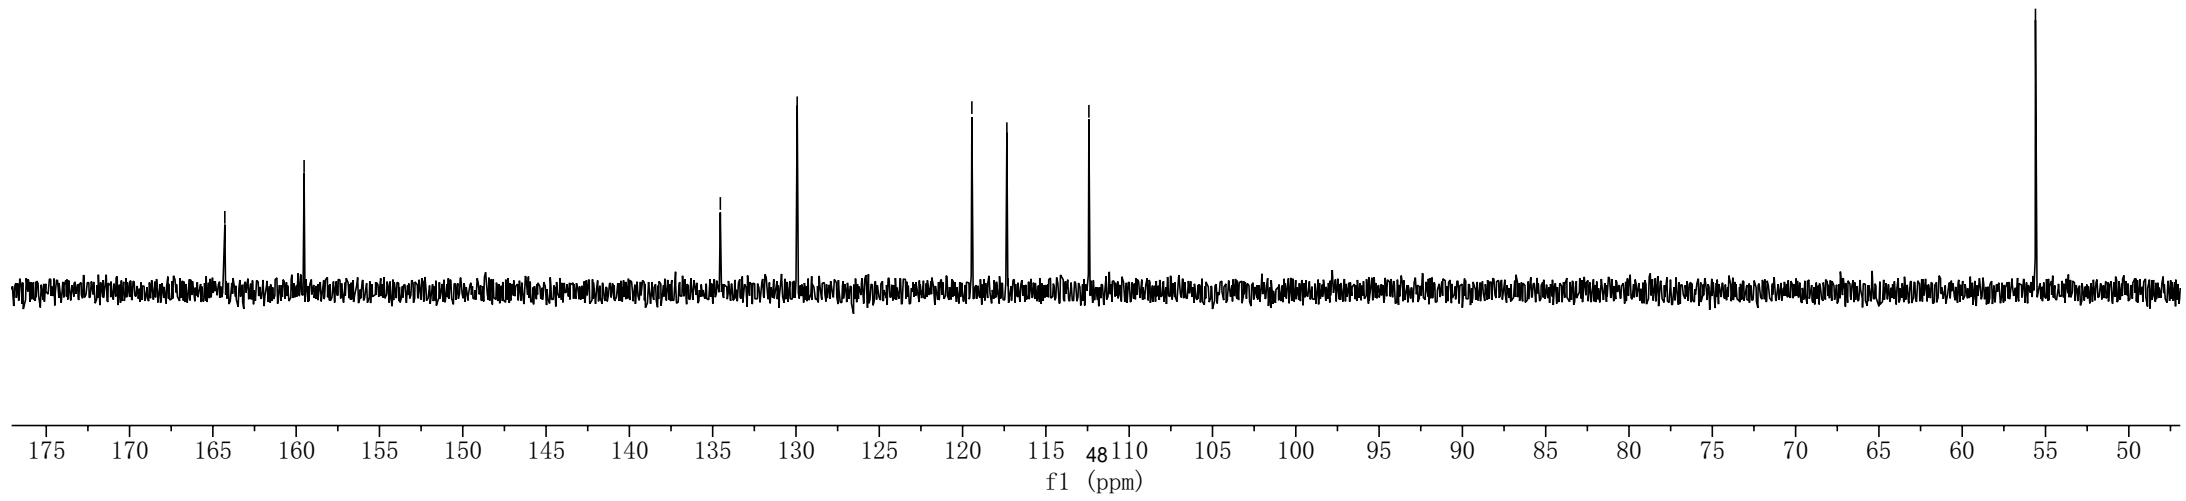



# Qualitative Analysis Report

|                               |              |                      |                      |
|-------------------------------|--------------|----------------------|----------------------|
| <b>Data Filename</b>          | H-18.d       | <b>Sample Name</b>   | H-18                 |
| <b>Sample Type</b>            | Sample       | <b>Position</b>      | P1-F2                |
| <b>Instrument Name</b>        | Instrument 1 | <b>User Name</b>     |                      |
| <b>Acq Method</b>             | FU100-1000.m | <b>Acquired Time</b> | 9/10/2021 8:47:56 PM |
| <b>IRM Calibration Status</b> | Success      | <b>DA Method</b>     | 20170311.m           |
| <b>Comment</b>                |              |                      |                      |

**Sample Group** Info.  
**Acquisition SW** 6200 series TOF/6500 series  
**Version** Q-TOF B.05.01 (B5125.2)

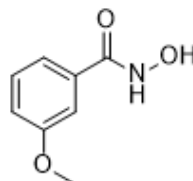

2j

## User Spectra

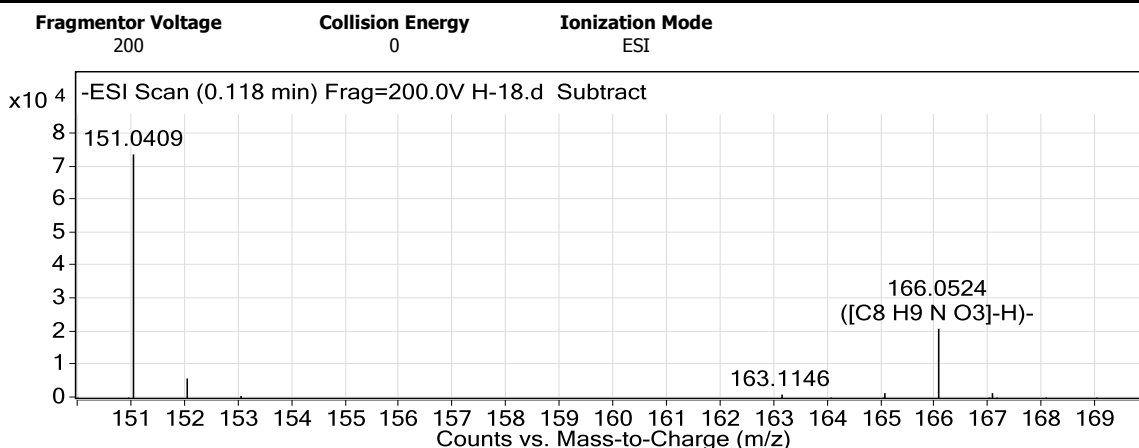

### Peak List

| m/z      | z | Abund    | Formula    | Ion    |
|----------|---|----------|------------|--------|
| 107.0429 |   | 26161.12 |            |        |
| 108.0237 | 1 | 8583.72  |            |        |
| 110.9761 |   | 8107.1   |            |        |
| 151.0409 | 1 | 73910.88 |            |        |
| 166.0524 | 1 | 21064.24 | C8 H9 N O3 | (M-H)- |
| 255.2341 | 1 | 9760.45  |            |        |
| 283.2659 | 1 | 9810.59  |            |        |
| 339.2342 | 1 | 75419.22 |            |        |
| 340.2372 | 1 | 18809.45 |            |        |
| 424.287  | 1 | 8763.27  |            |        |

### Formula Calculator Element Limits

| Element | Min | Max |
|---------|-----|-----|
| C       | 3   | 60  |
| H       | 0   | 120 |
| O       | 0   | 30  |
| N       | 0   | 30  |
| Cl      | 0   | 0   |
| F       | 0   | 0   |

### Formula Calculator Results

| Formula    | Best | Mass     | Tgt Mass | Diff (ppm) | Ion Species | Score |
|------------|------|----------|----------|------------|-------------|-------|
| C8 H9 N O3 | TRUE | 167.0597 | 167.0582 | -8.63      | C8 H8 N O3  | 87.85 |

--- End Of Report ---

10.48

9.07

7.54  
7.52  
7.43  
7.41  
7.39  
7.09  
7.07  
7.01  
6.99  
6.97

4.14  
4.13  
4.11  
4.09

3.31 H<sub>2</sub>O

2.51 DMSO  
2.50 DMSO  
2.50 DMSO  
2.50 DMSO  
2.49 DMSO

1.36  
1.34  
1.33

0.00

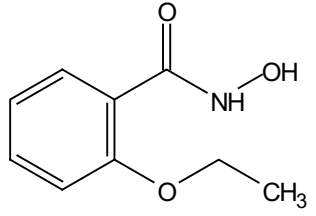

2k

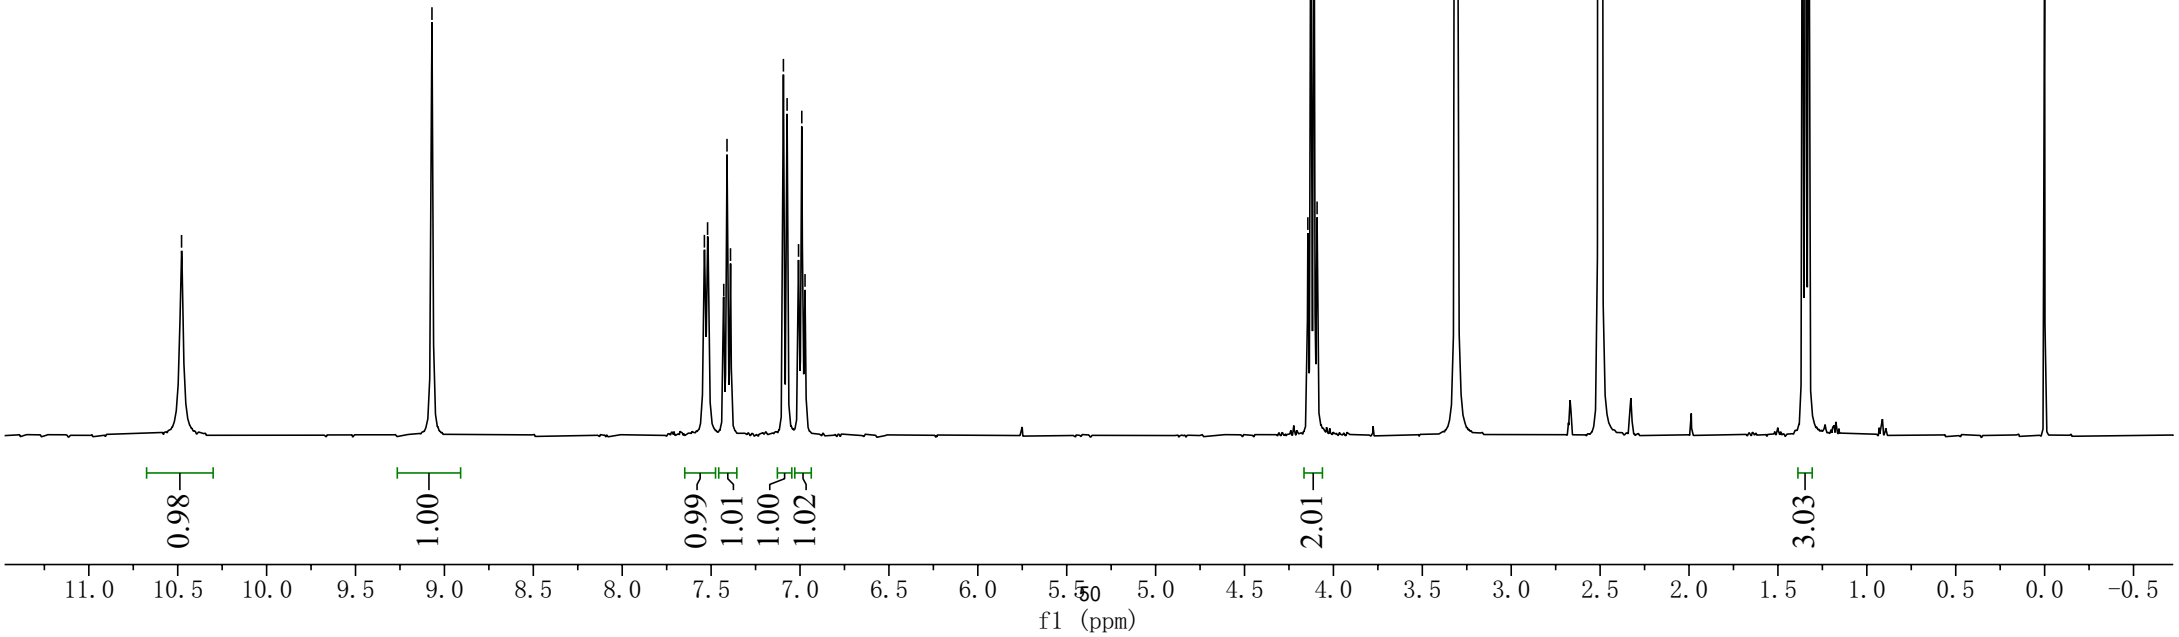

—163.83

—156.30

~132.15

~130.28

~123.32

~120.76

—113.25

—64.43

—14.96

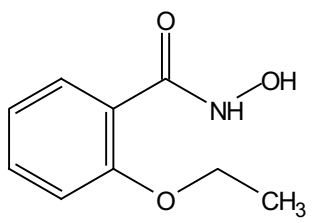

**2k**

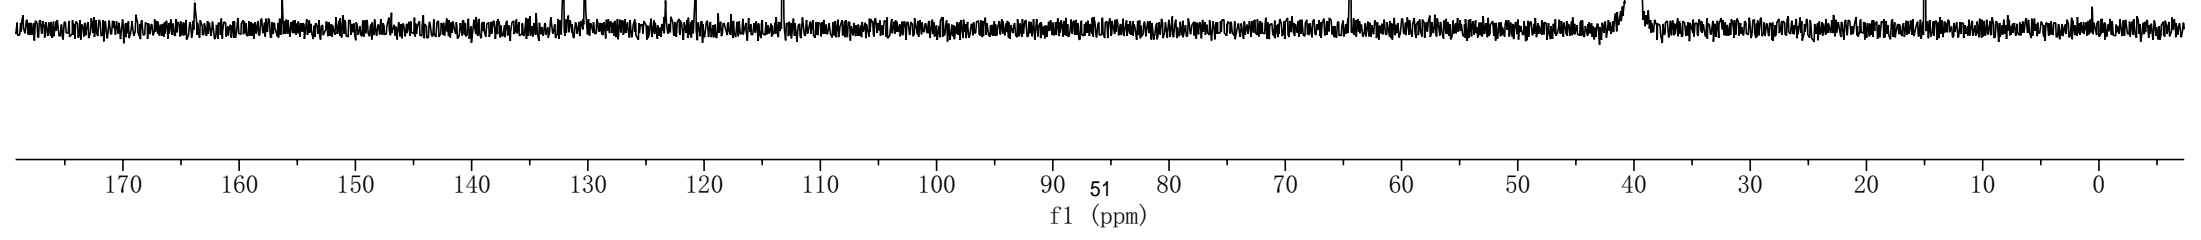

# Qualitative Analysis Report

|                               |              |                      |                      |
|-------------------------------|--------------|----------------------|----------------------|
| <b>Data Filename</b>          | H-1.d        | <b>Sample Name</b>   | H-1                  |
| <b>Sample Type</b>            | Sample       | <b>Position</b>      | P1-D3                |
| <b>Instrument Name</b>        | Instrument 1 | <b>User Name</b>     |                      |
| <b>Acq Method</b>             | FU100-1000.m | <b>Acquired Time</b> | 9/10/2021 7:57:54 PM |
| <b>IRM Calibration Status</b> | Success      | <b>DA Method</b>     | 20170311.m           |
| <b>Comment</b>                |              |                      |                      |

**Sample Group** Info.  
**Acquisition SW** 6200 series TOF/6500 series  
**Version** Q-TOF B.05.01 (B5125.2)

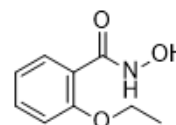

2k

## User Spectra

**Fragmentor Voltage** 200      **Collision Energy** 0      **Ionization Mode** ESI

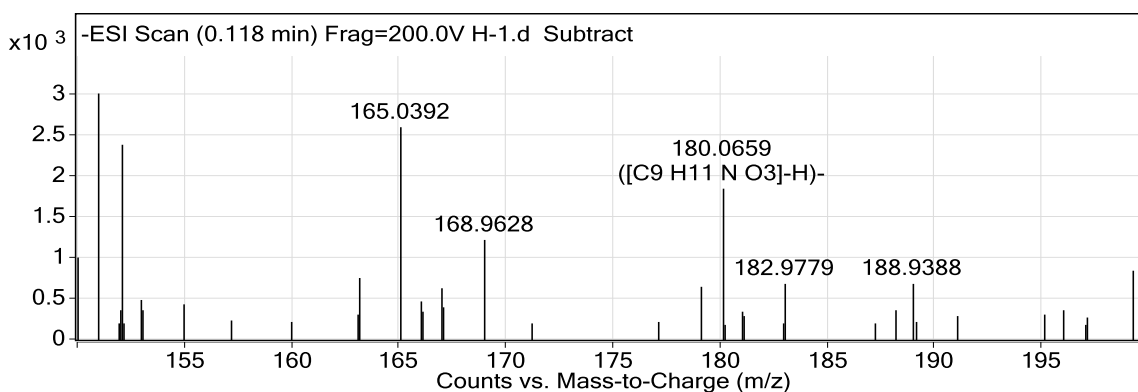

## Peak List

| m/z      | z | Abund    |
|----------|---|----------|
| 110.9747 |   | 16586.93 |
| 134.0236 | 1 | 10764.76 |
| 149.0082 | 1 | 8650.45  |
| 223.0281 | 1 | 12368.32 |
| 225.0085 | 1 | 7407.75  |
| 255.2313 | 1 | 14229.81 |
| 283.2622 | 1 | 14410.59 |
| 299.0249 | 1 | 5546.05  |
| 339.2306 | 1 | 52745.51 |
| 340.2325 | 1 | 12475.7  |

## Formula Calculator Element Limits

| Element | Min | Max |
|---------|-----|-----|
| C       | 3   | 60  |
| H       | 0   | 120 |
| O       | 0   | 30  |
| N       | 0   | 30  |
| Cl      | 0   | 0   |
| F       | 0   | 0   |
| S       | 0   | 0   |
| Br      | 0   | 0   |

## Formula Calculator Results

| Formula     | Best | Mass     | Tgt Mass | Diff (ppm) | Ion Species | Score |
|-------------|------|----------|----------|------------|-------------|-------|
| C9 H11 N O3 | TRUE | 181.0732 | 181.0739 | 3.92       | C9 H10 N O3 | 76.35 |

--- End Of Report ---

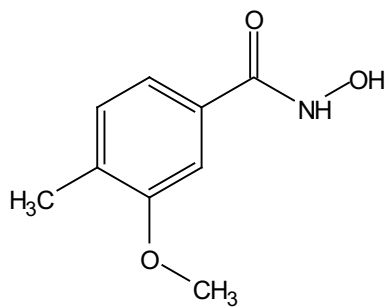

**2I**

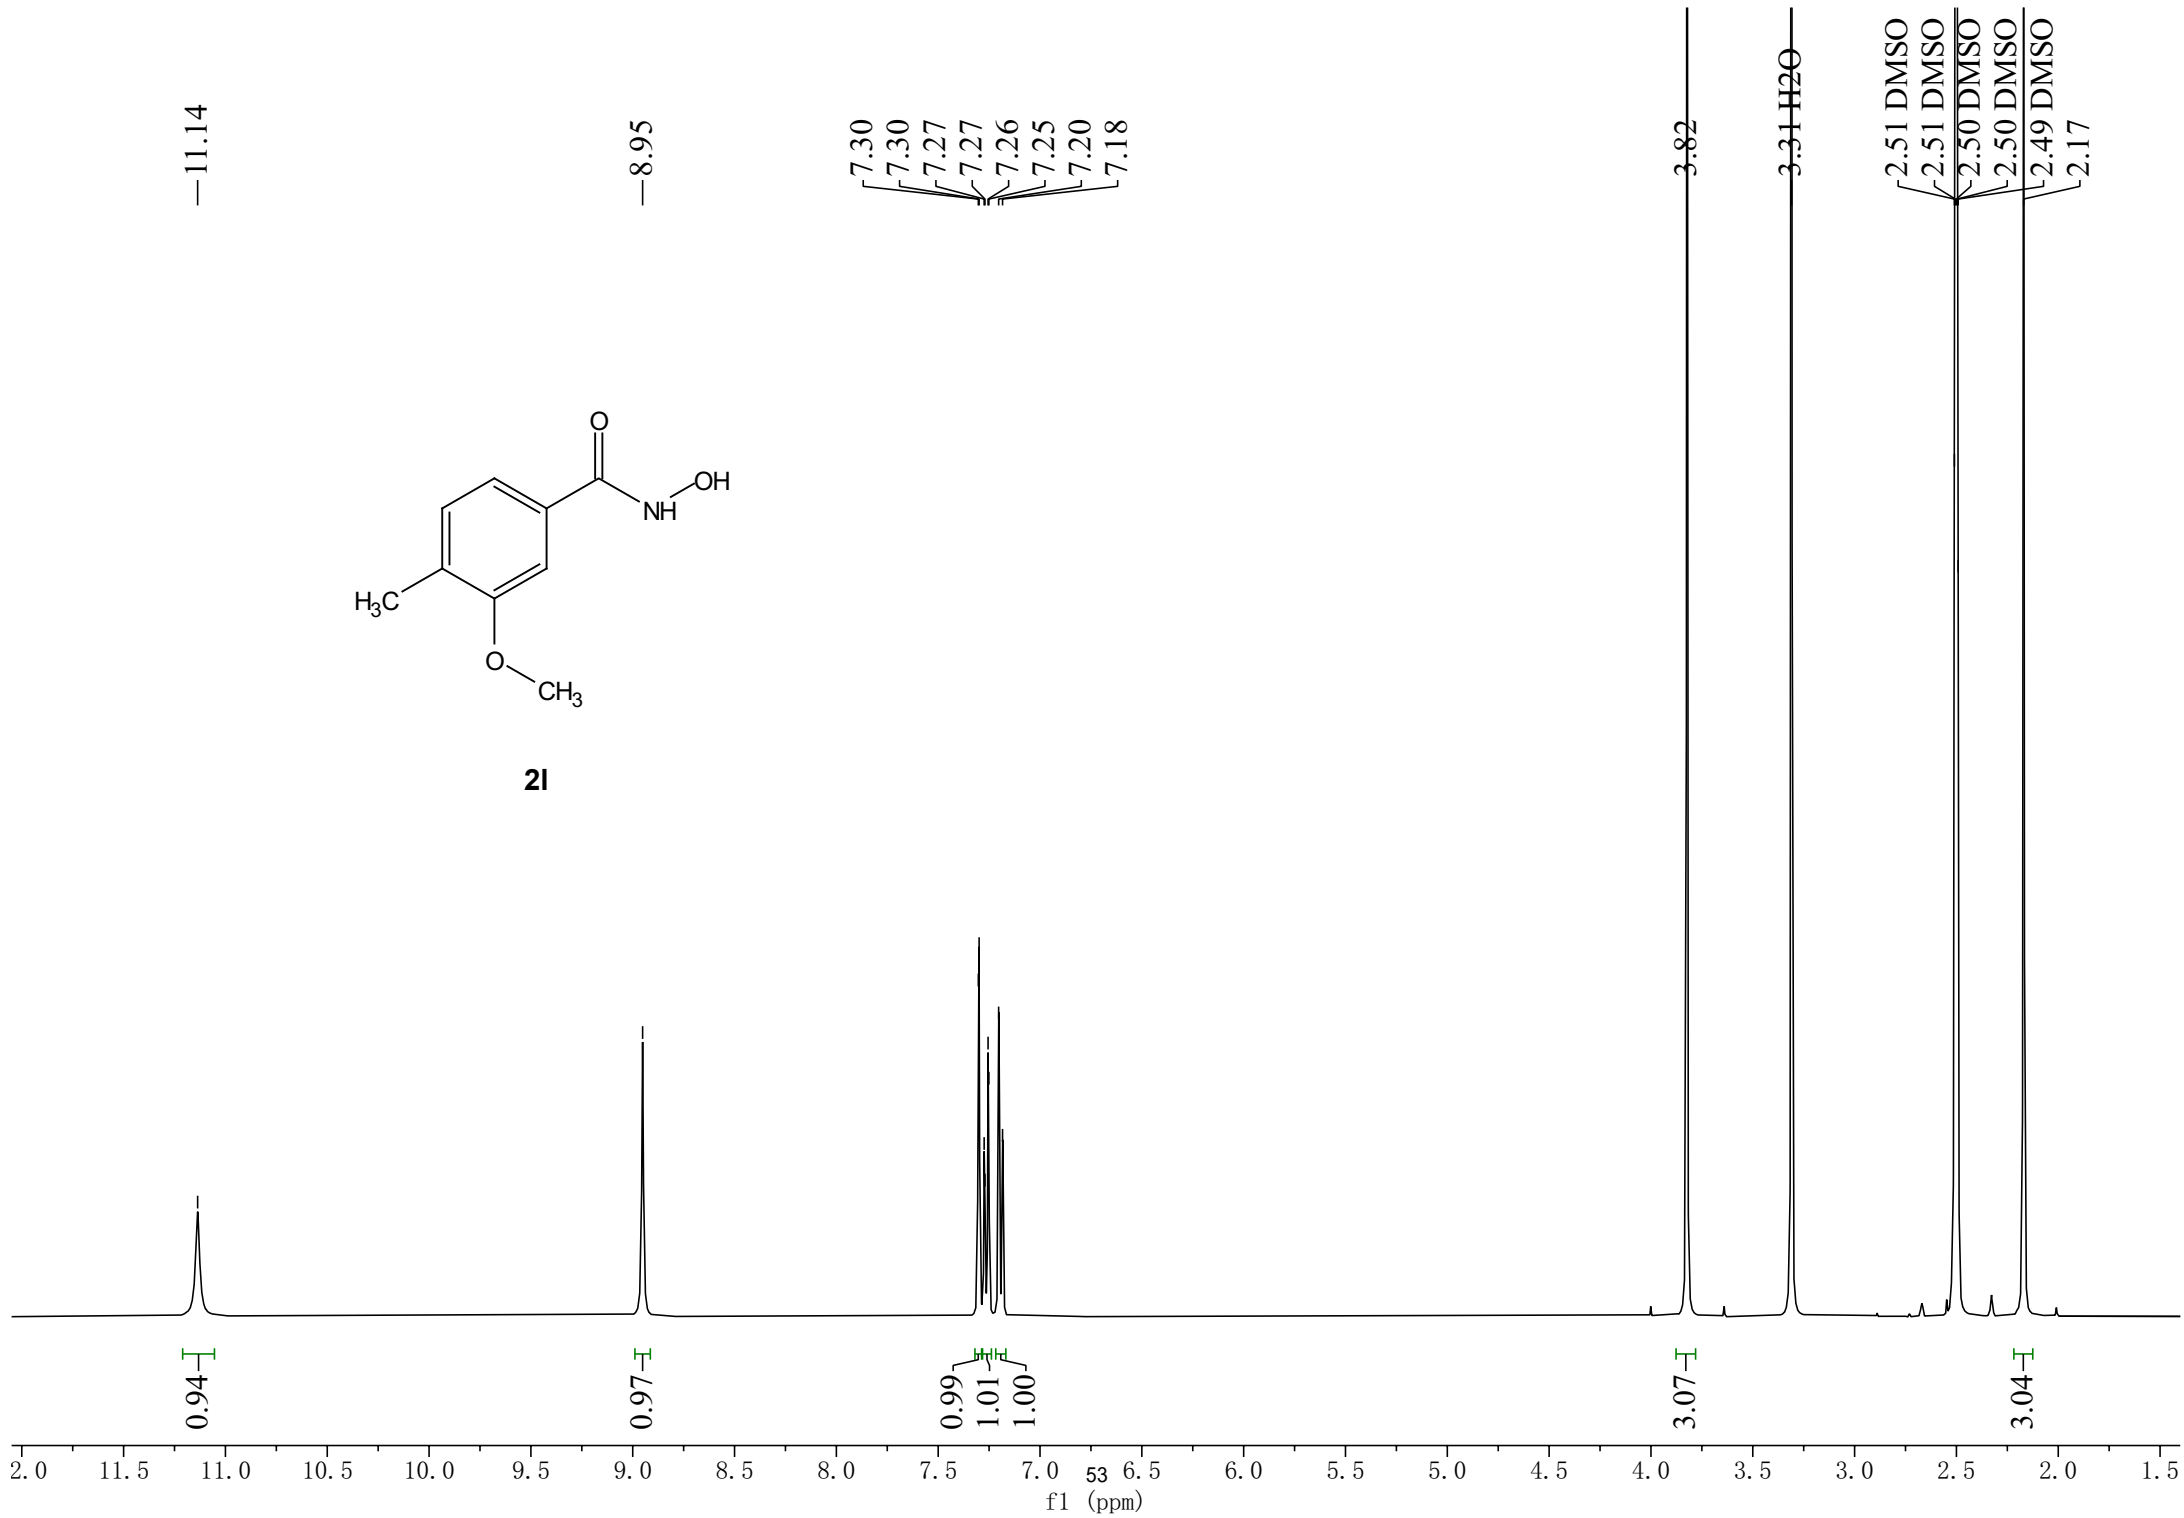

—164.58

—157.58

∧132.15

—130.63

∧129.57

—119.28

—109.07

—55.79

—16.44

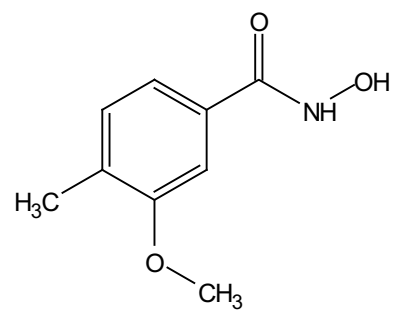

**21**

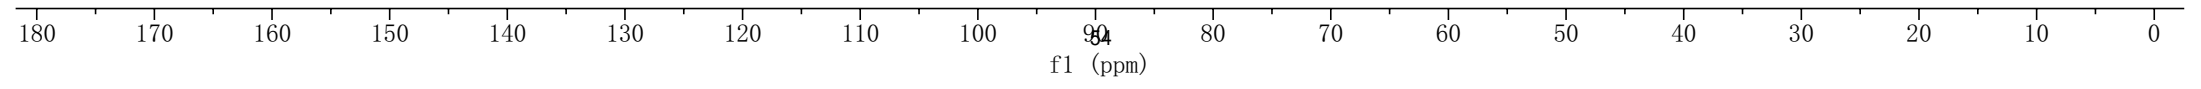

# Qualitative Analysis Report

|                               |              |                      |                      |
|-------------------------------|--------------|----------------------|----------------------|
| <b>Data Filename</b>          | H-11.d       | <b>Sample Name</b>   | H-11                 |
| <b>Sample Type</b>            | Sample       | <b>Position</b>      | P1-E4                |
| <b>Instrument Name</b>        | Instrument 1 | <b>User Name</b>     |                      |
| <b>Acq Method</b>             | FU100-1000.m | <b>Acquired Time</b> | 9/10/2021 8:27:24 PM |
| <b>IRM Calibration Status</b> | Success      | <b>DA Method</b>     | 20170311.m           |
| <b>Comment</b>                |              |                      |                      |

**Sample Group** Info.  
**Acquisition SW** 6200 series TOF/6500 series  
**Version** Q-TOF B.05.01 (B5125.2)

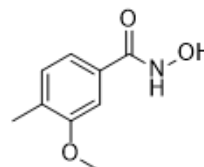

21

## User Spectra

**Fragmentor Voltage** 200      **Collision Energy** 0      **Ionization Mode** ESI

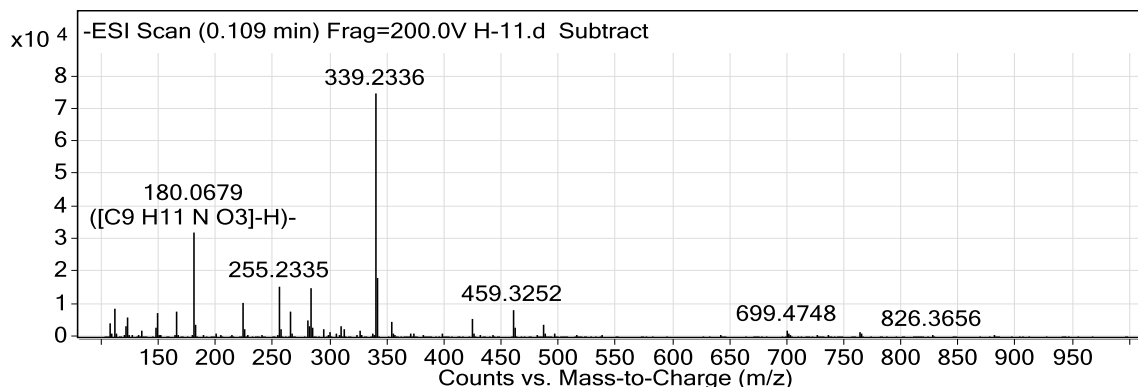

### Peak List

| m/z      | z | Abund    | Formula     | Ion    |
|----------|---|----------|-------------|--------|
| 110.9757 |   | 8873.31  |             |        |
| 165.045  | 1 | 8032.42  |             |        |
| 180.0679 | 1 | 32062.4  | C9 H11 N O3 | (M-H)- |
| 223.0288 | 1 | 10612.4  |             |        |
| 255.2335 | 1 | 15861.86 |             |        |
| 265.1485 | 1 | 8077.94  |             |        |
| 283.2653 | 1 | 15353.16 |             |        |
| 339.2336 | 1 | 74971.66 |             |        |
| 340.2355 | 1 | 18168.22 |             |        |
| 459.3252 | 1 | 8547.56  |             |        |

### Formula Calculator Element Limits

| Element | Min | Max |
|---------|-----|-----|
| C       | 3   | 60  |
| H       | 0   | 120 |
| O       | 0   | 30  |
| N       | 0   | 30  |
| Cl      | 0   | 0   |
| F       | 0   | 0   |
| Br      | 0   | 0   |
| I       | 0   | 0   |

### Formula Calculator Results

| Formula     | Best | Mass     | Tgt Mass | Diff (ppm) | Ion Species | Score |
|-------------|------|----------|----------|------------|-------------|-------|
| C9 H11 N O3 | TRUE | 181.0751 | 181.0739 | -6.91      | C9 H10 N O3 | 91.43 |

--- End Of Report ---

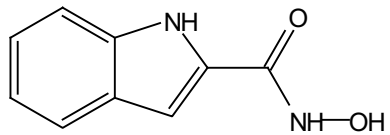

2m

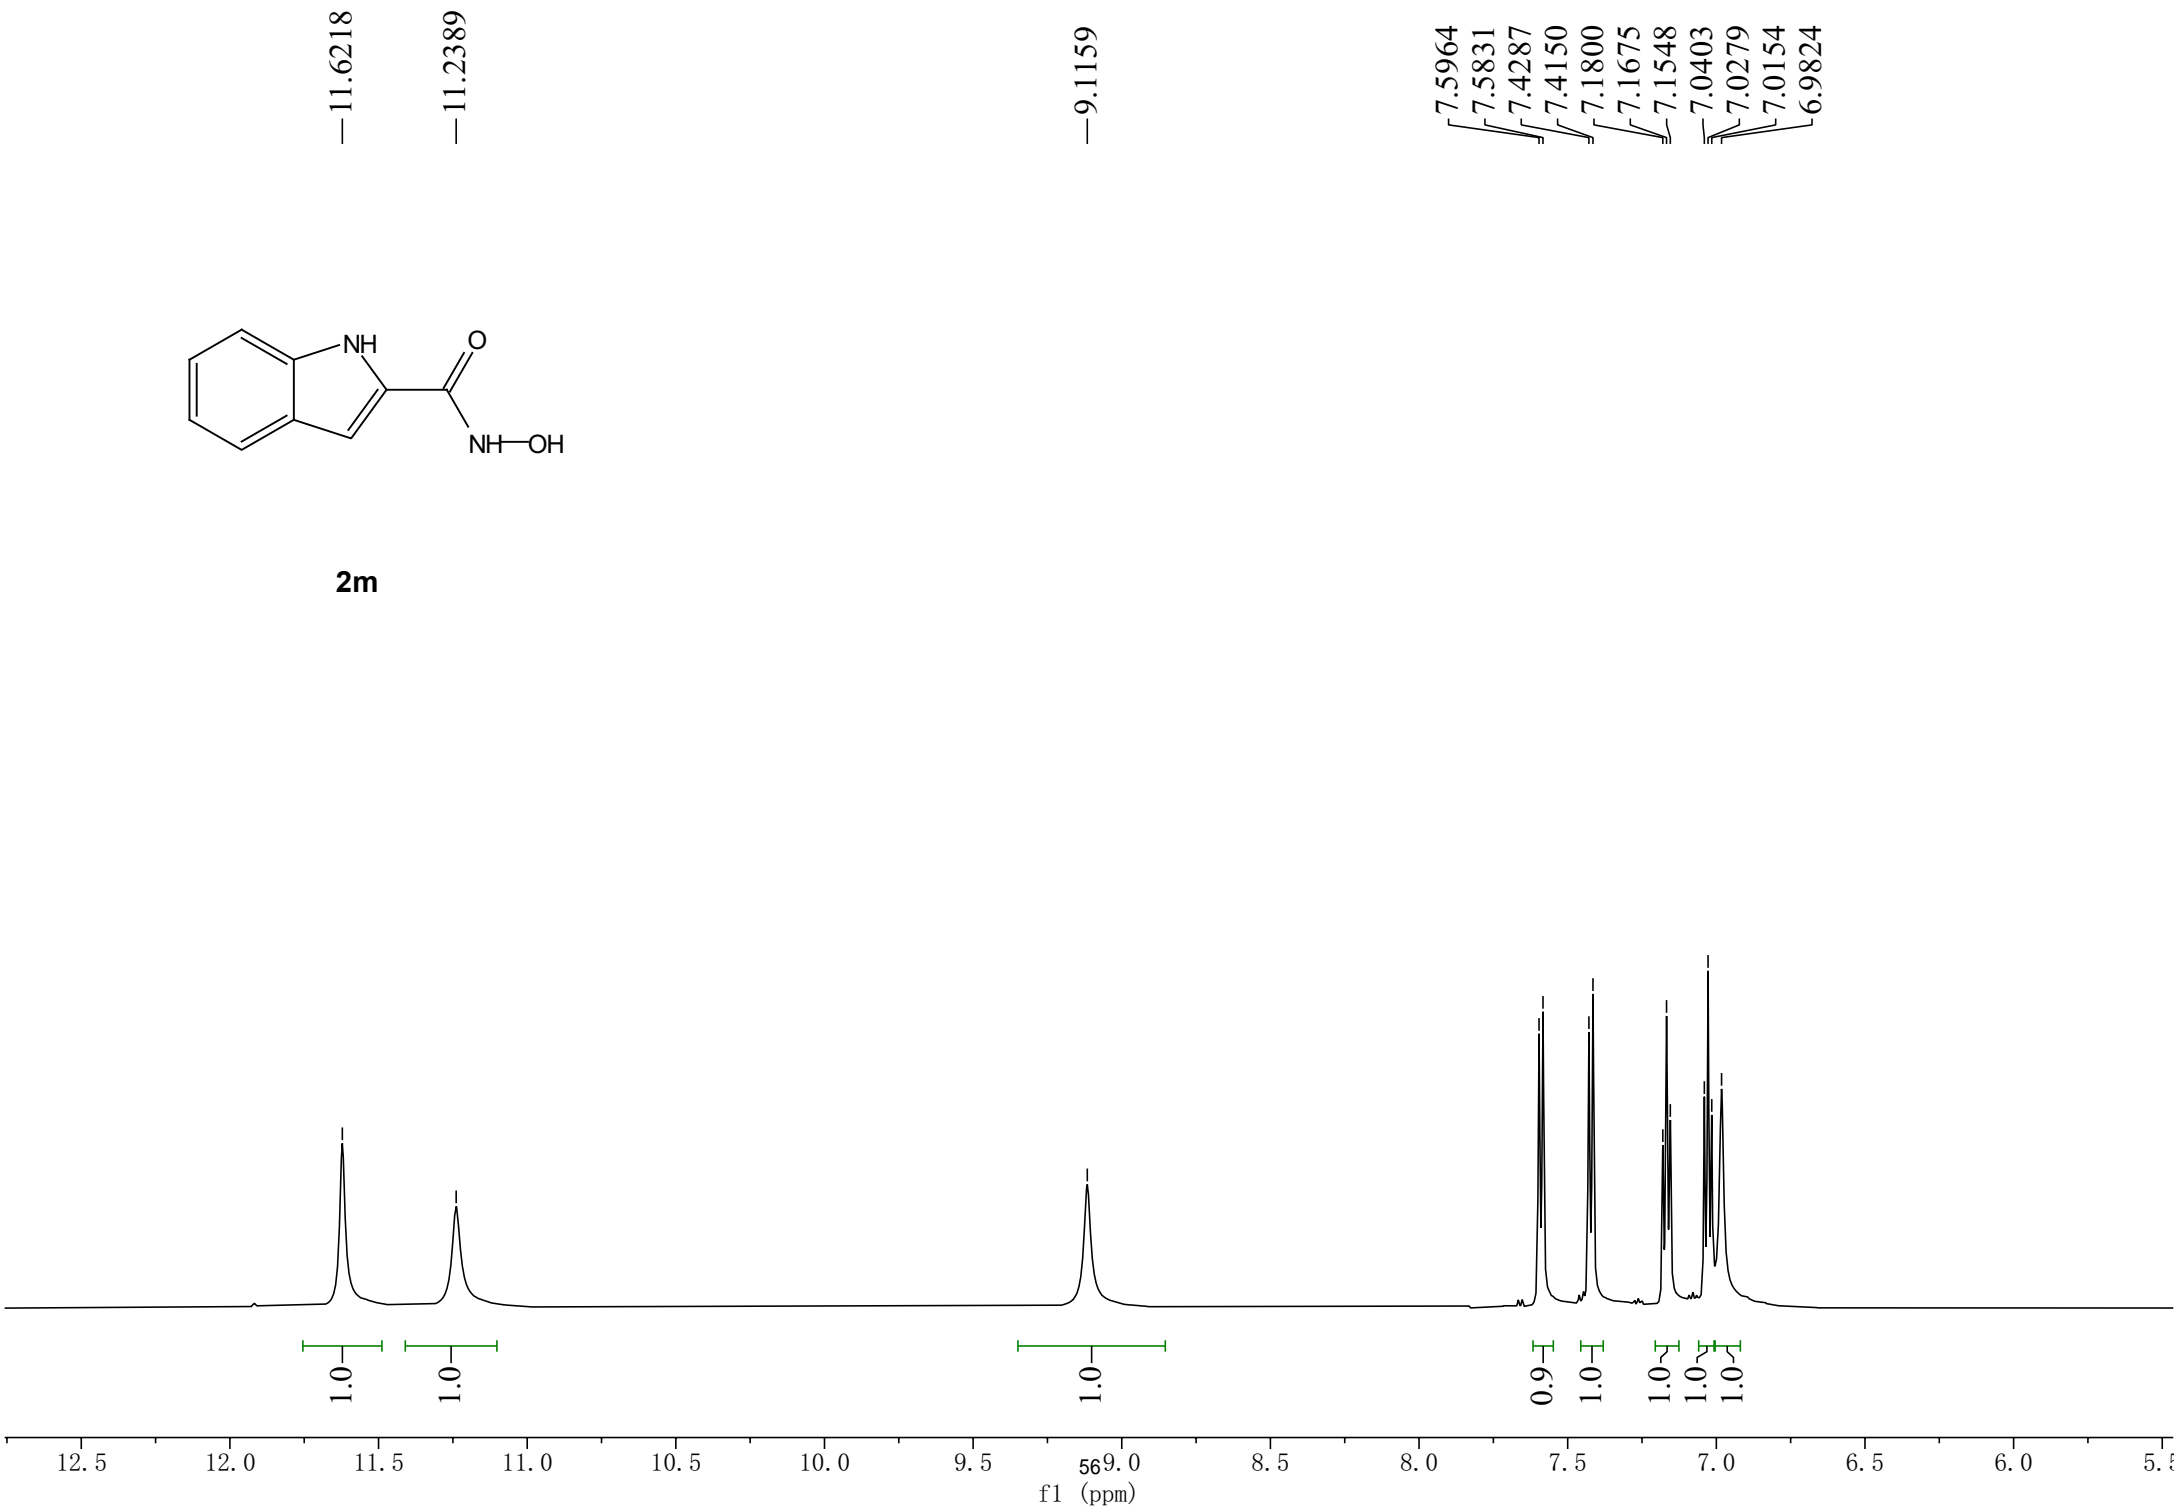



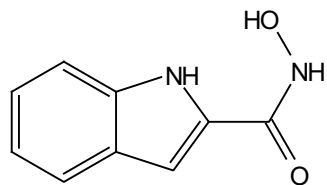

2m

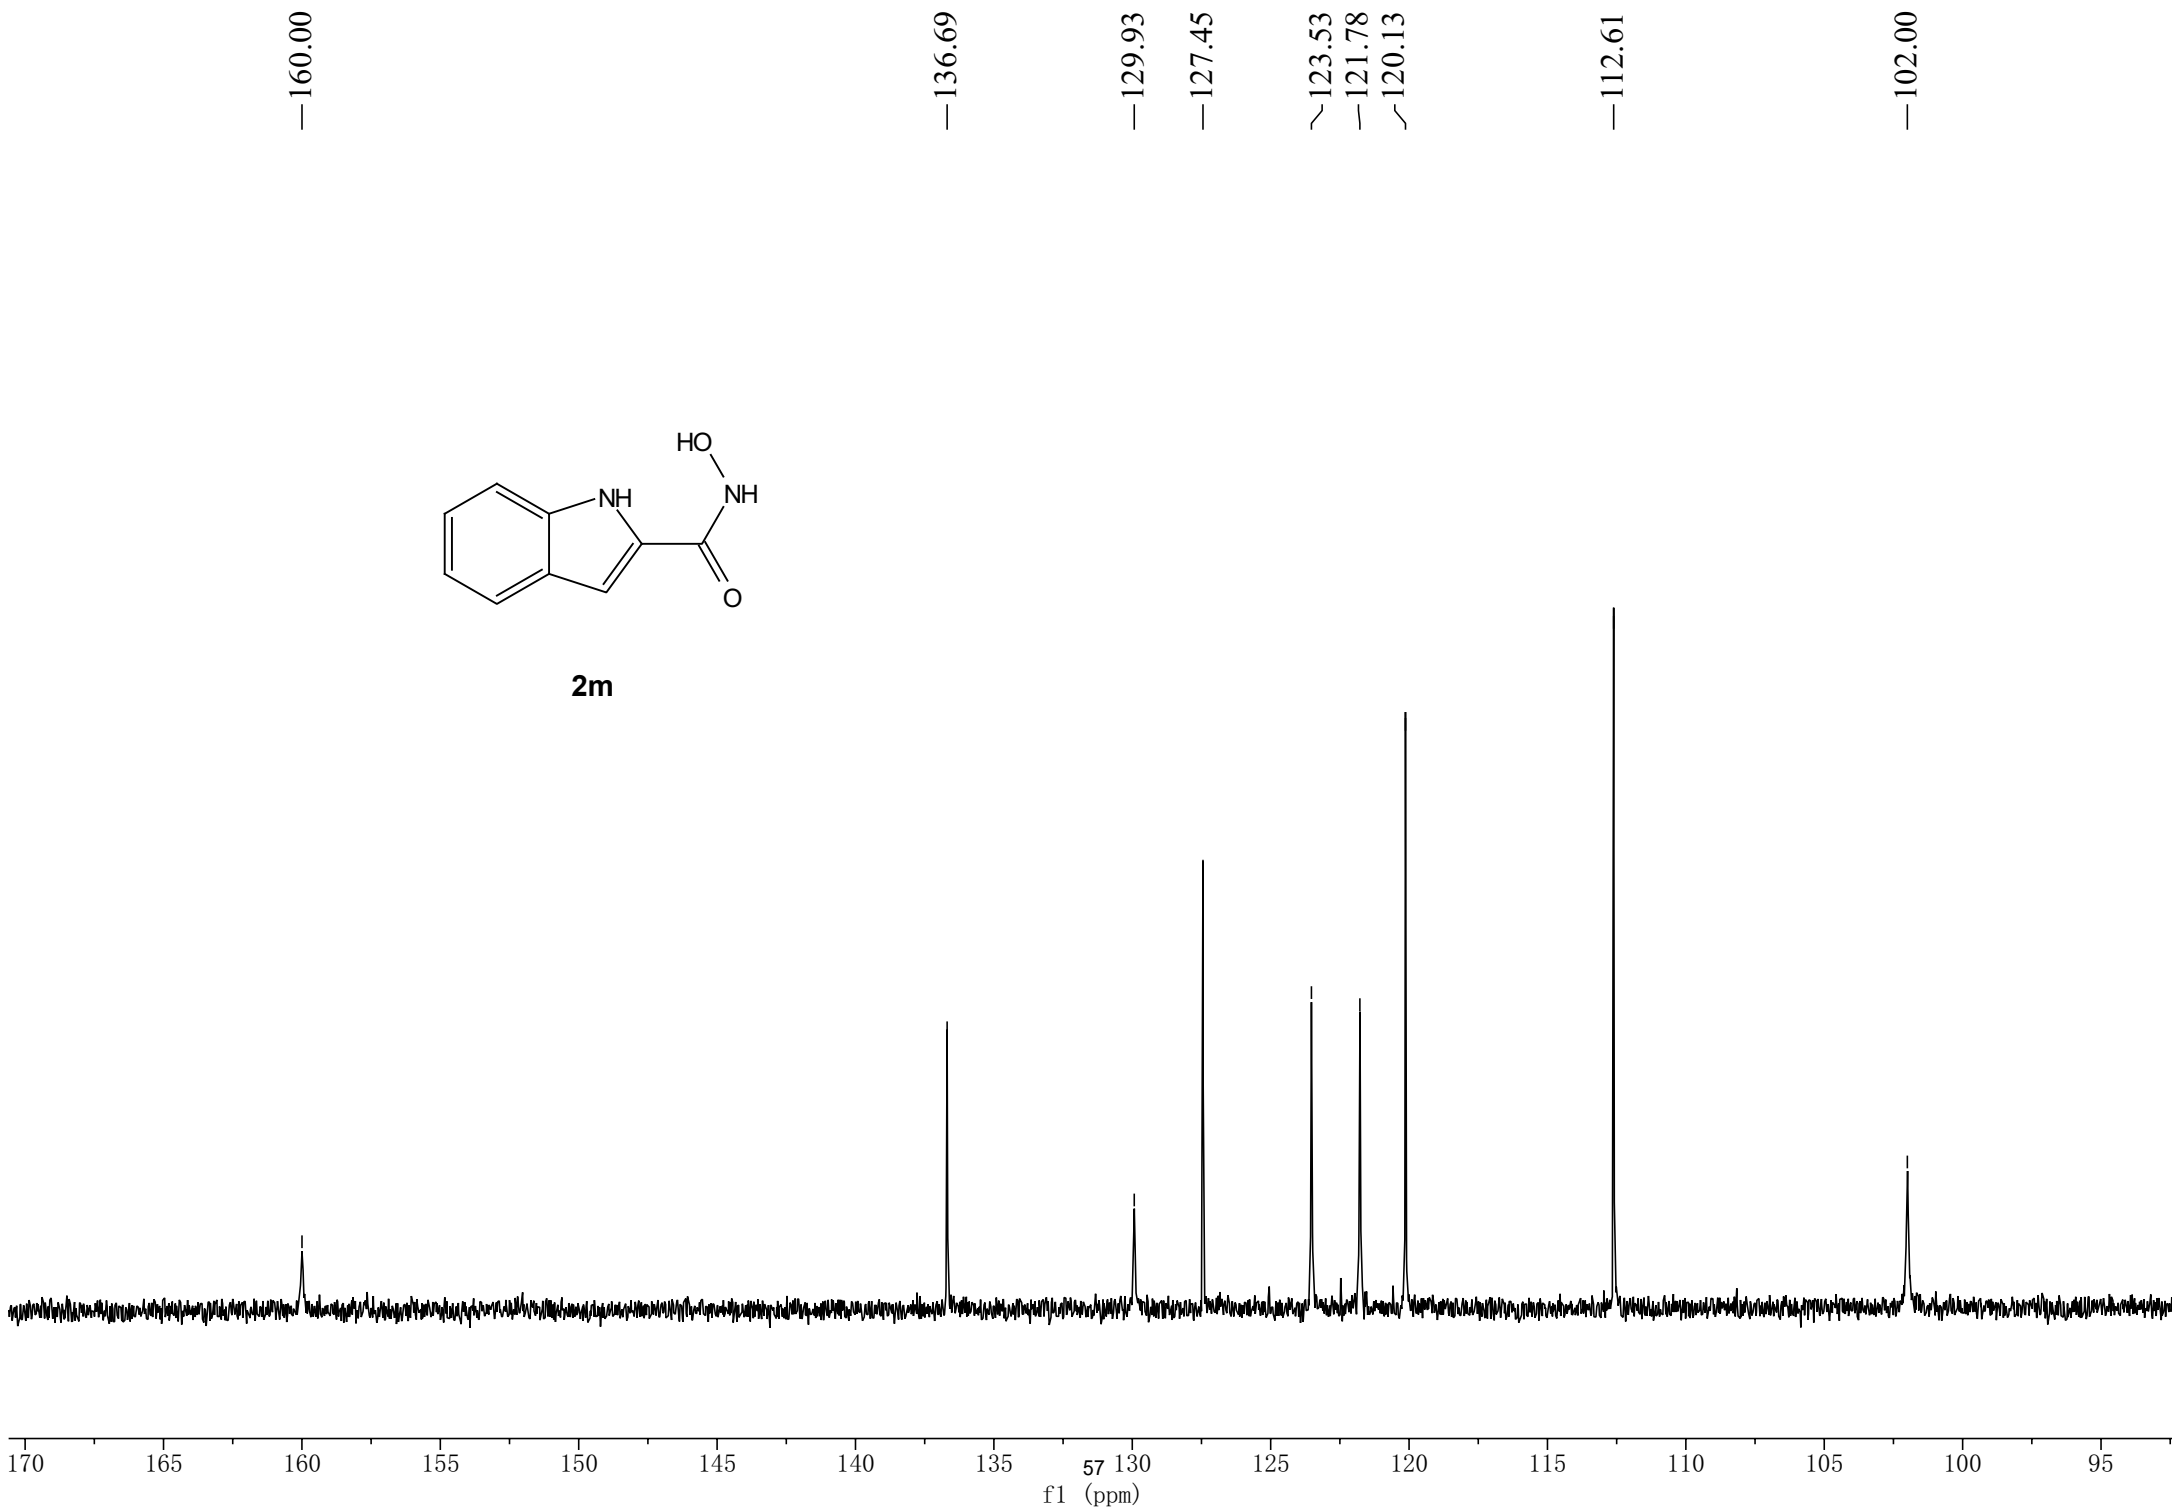

# Qualitative Analysis Report

|                               |              |                      |                      |
|-------------------------------|--------------|----------------------|----------------------|
| <b>Data Filename</b>          | H-9.d        | <b>Sample Name</b>   | H-9                  |
| <b>Sample Type</b>            | Sample       | <b>Position</b>      | P1-E2                |
| <b>Instrument Name</b>        | Instrument 1 | <b>User Name</b>     |                      |
| <b>Acq Method</b>             | FU100-1000.m | <b>Acquired Time</b> | 9/10/2021 8:21:31 PM |
| <b>IRM Calibration Status</b> | Success      | <b>DA Method</b>     | 20170311.m           |
| <b>Comment</b>                |              |                      |                      |

**Sample Group** Info.  
**Acquisition SW** 6200 series TOF/6500 series  
**Version** Q-TOF B.05.01 (B5125.2)

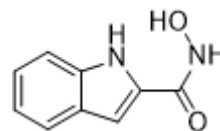

**2m**

## User Spectra

**Fragmentor Voltage** 200      **Collision Energy** 0      **Ionization Mode** ESI

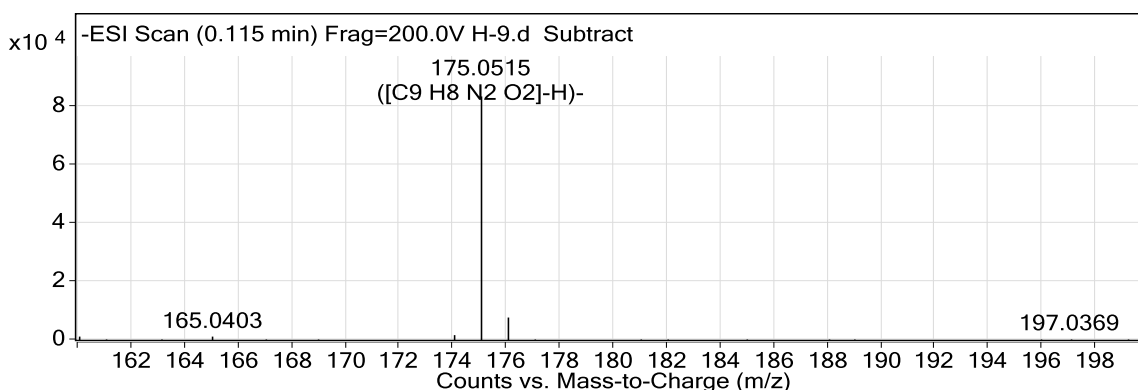

### Peak List

| m/z      | z | Abund     | Formula     | Ion    |
|----------|---|-----------|-------------|--------|
| 110.975  |   | 7256.83   |             |        |
| 115.0421 |   | 11173.14  |             |        |
| 116.0495 | 1 | 11671.8   |             |        |
| 131.0387 | 1 | 15016.66  |             |        |
| 157.0411 | 1 | 291610.16 |             |        |
| 158.0433 | 1 | 25498.4   |             |        |
| 175.0515 | 1 | 83650.23  | C9 H8 N2 O2 | (M-H)- |
| 176.0542 | 1 | 7867.67   | C9 H8 N2 O2 | (M-H)- |
| 223.0285 | 1 | 6597.09   |             |        |
| 339.232  | 1 | 25715.18  |             |        |

### Formula Calculator Element Limits

| Element | Min | Max |
|---------|-----|-----|
| C       | 3   | 60  |
| H       | 0   | 120 |
| O       | 0   | 30  |
| N       | 0   | 30  |
| Cl      | 0   | 0   |
| F       | 0   | 0   |
| Br      | 0   | 0   |
| I       | 0   | 0   |

### Formula Calculator Results

| Formula     | Best | Mass     | Tgt Mass | Diff (ppm) | Ion Species | Score |
|-------------|------|----------|----------|------------|-------------|-------|
| C9 H8 N2 O2 | TRUE | 176.0587 | 176.0586 | -0.96      | C9 H7 N2 O2 | 99.18 |

--- End Of Report ---

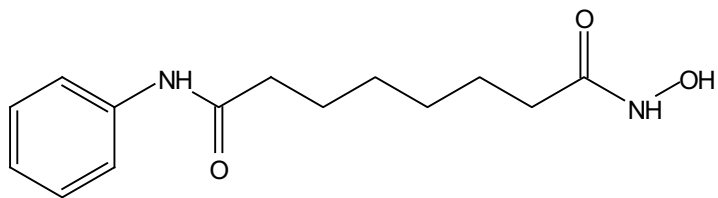

2n

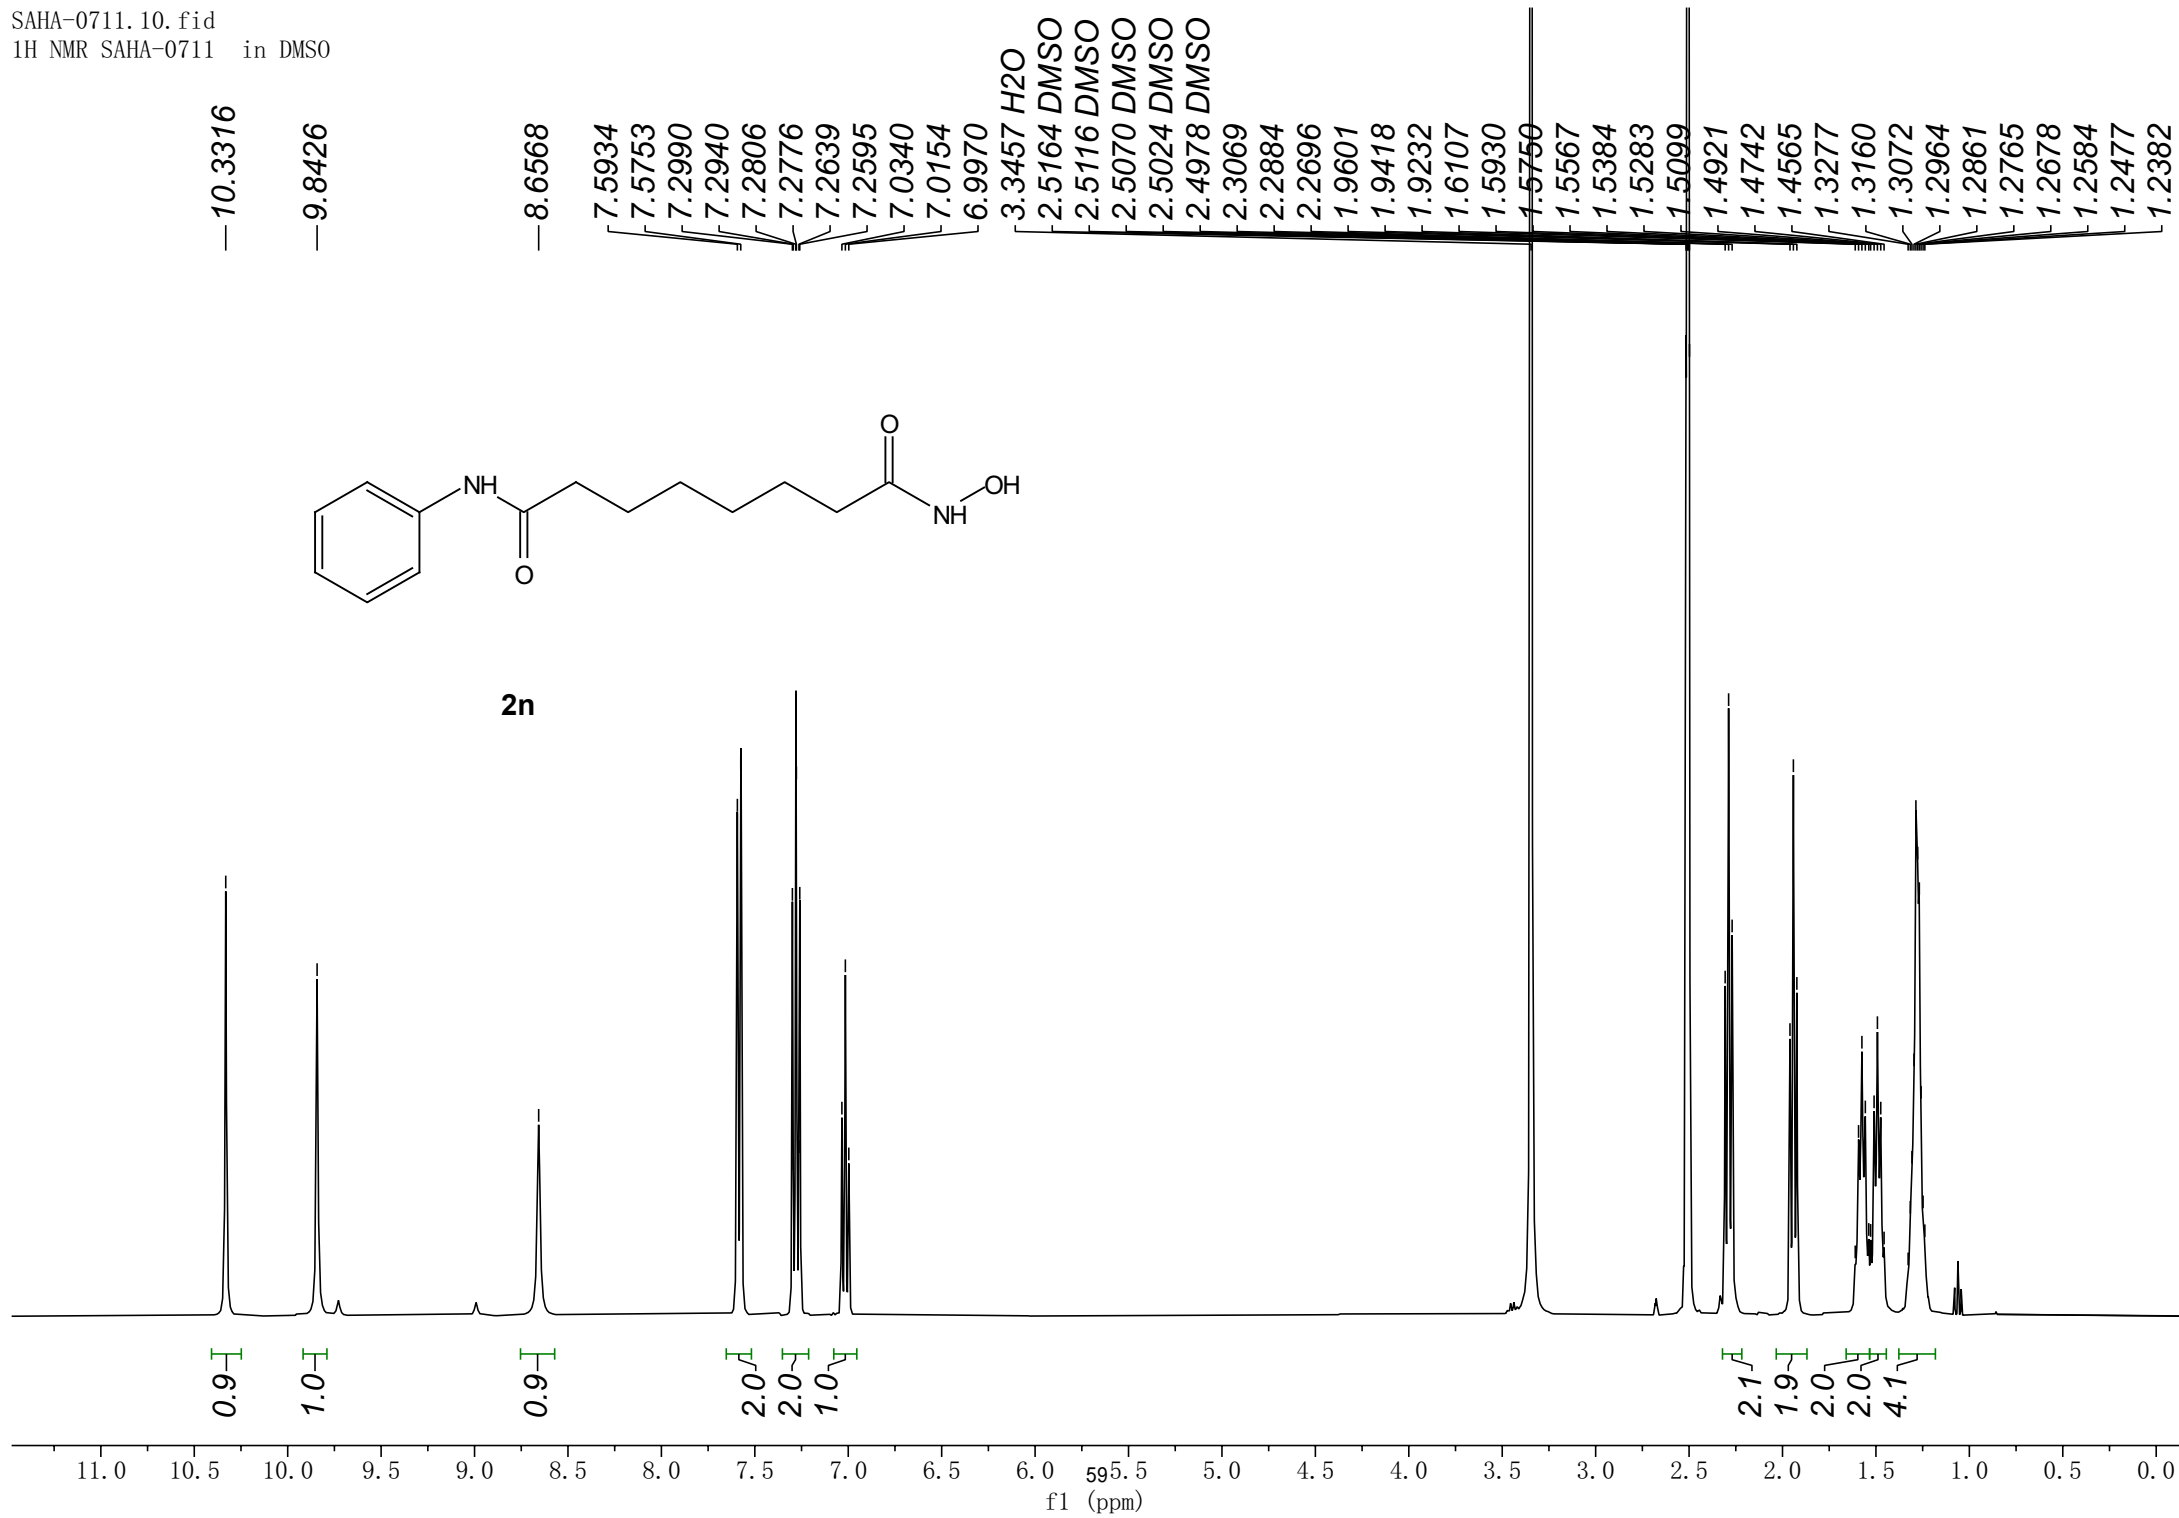

~171.6861  
~169.5723

—139.8100

~129.0996  
~123.3792  
~119.4946

40.6626 DMSO  
40.6112 DMSO  
40.5461  
40.4542 DMSO  
40.4033 DMSO  
40.2453 DMSO  
40.1938 DMSO  
40.0841  
40.0366 DMSO  
39.9862 DMSO  
39.8606  
39.7778 DMSO  
39.6705  
39.5696 DMSO  
39.4509  
39.3590 DMSO  
36.8361  
32.7128  
28.8803  
25.4949

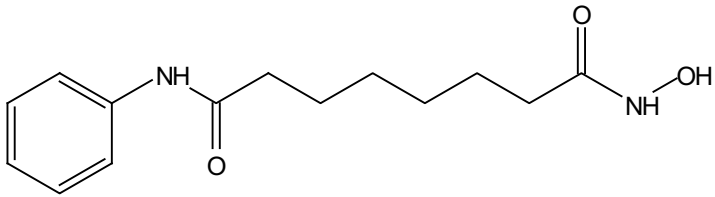

2n

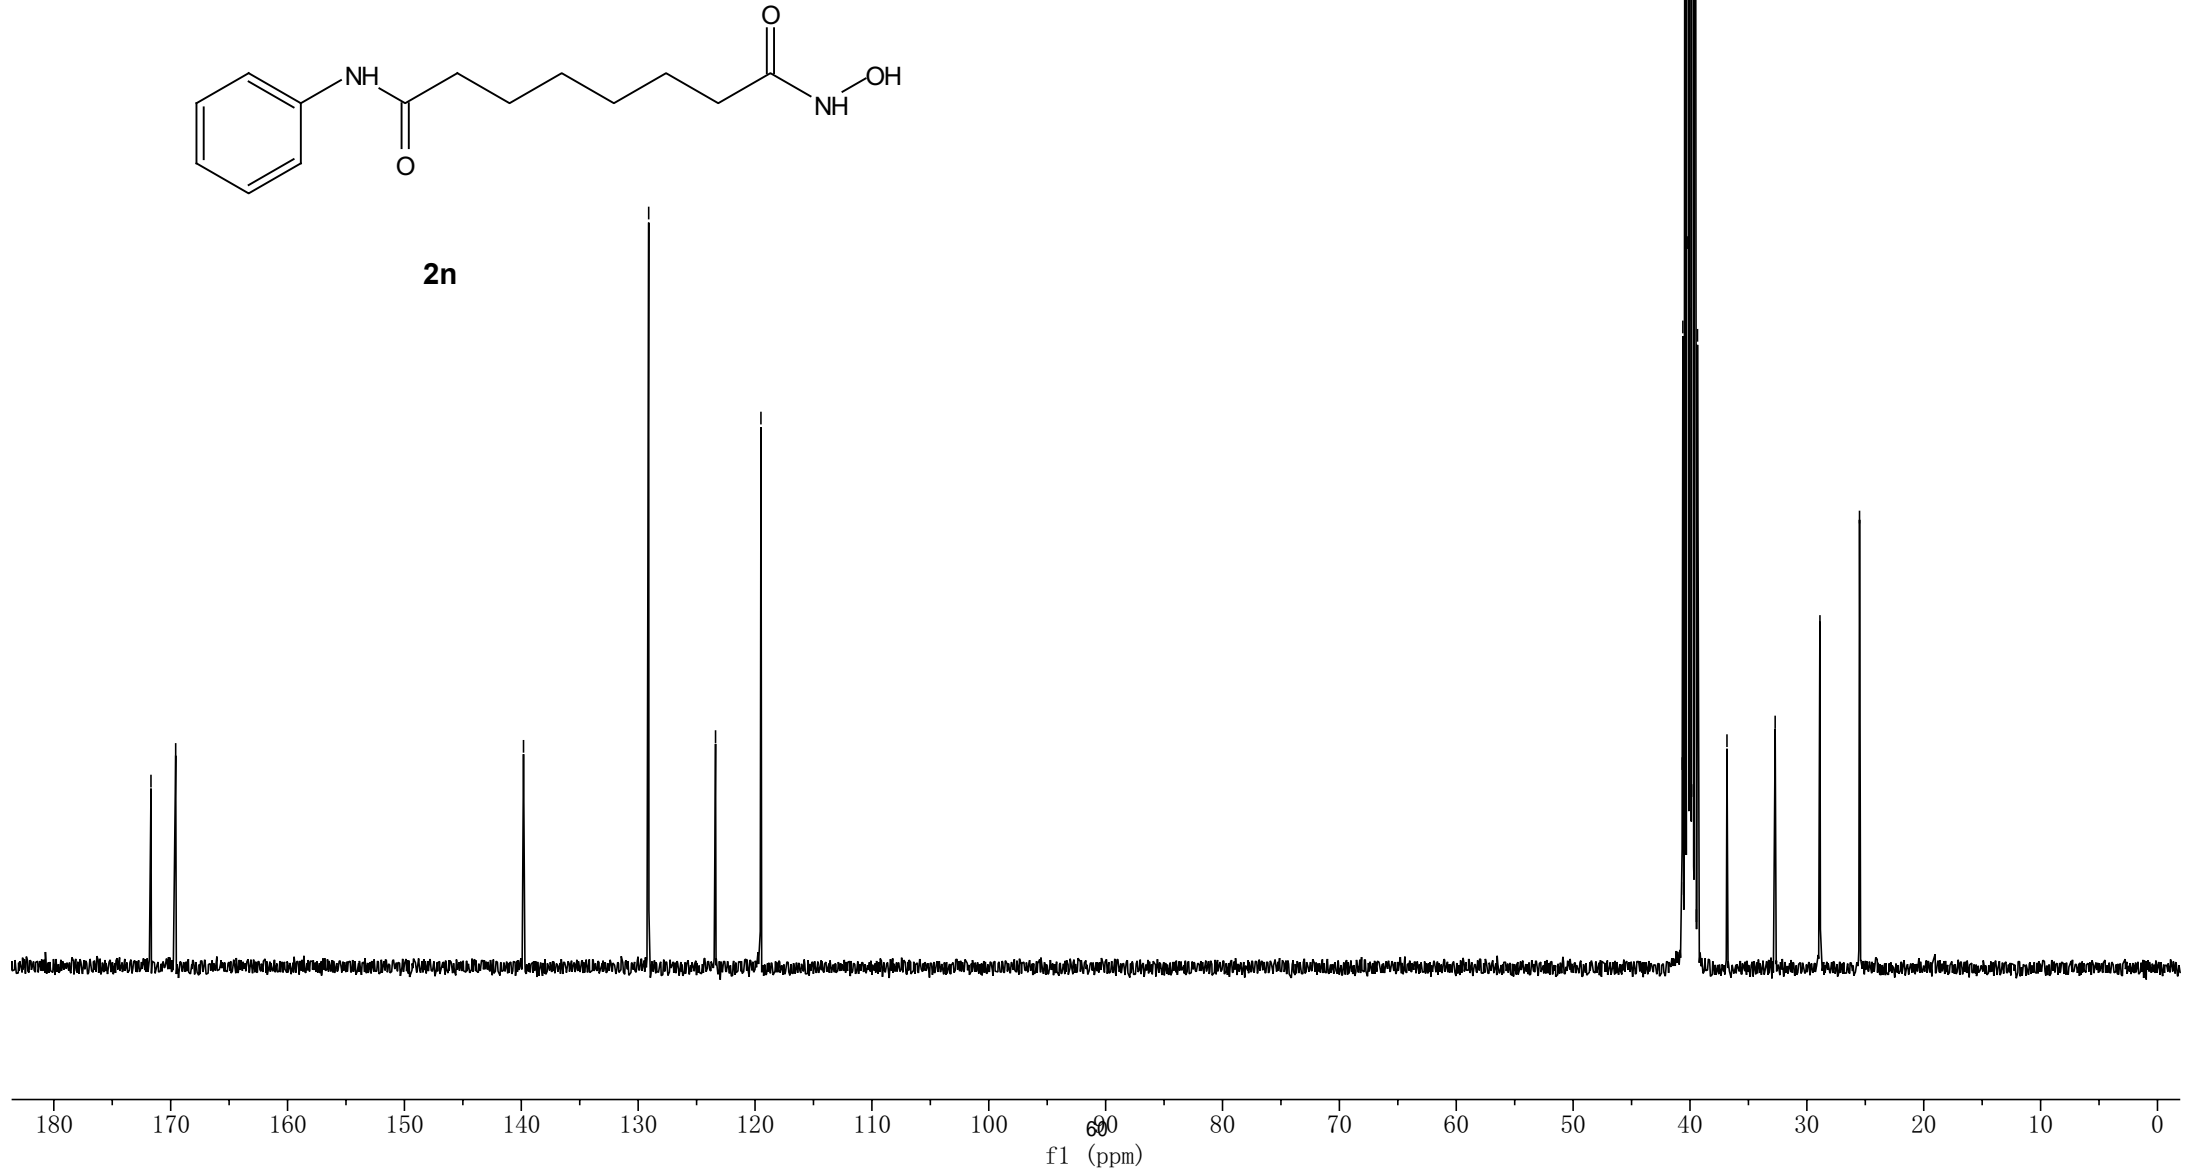

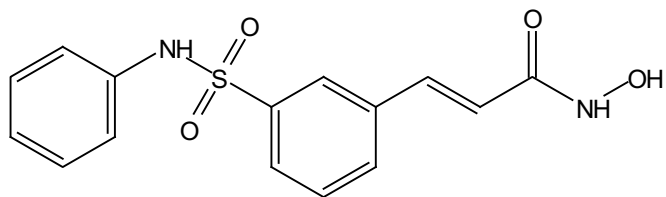

2o

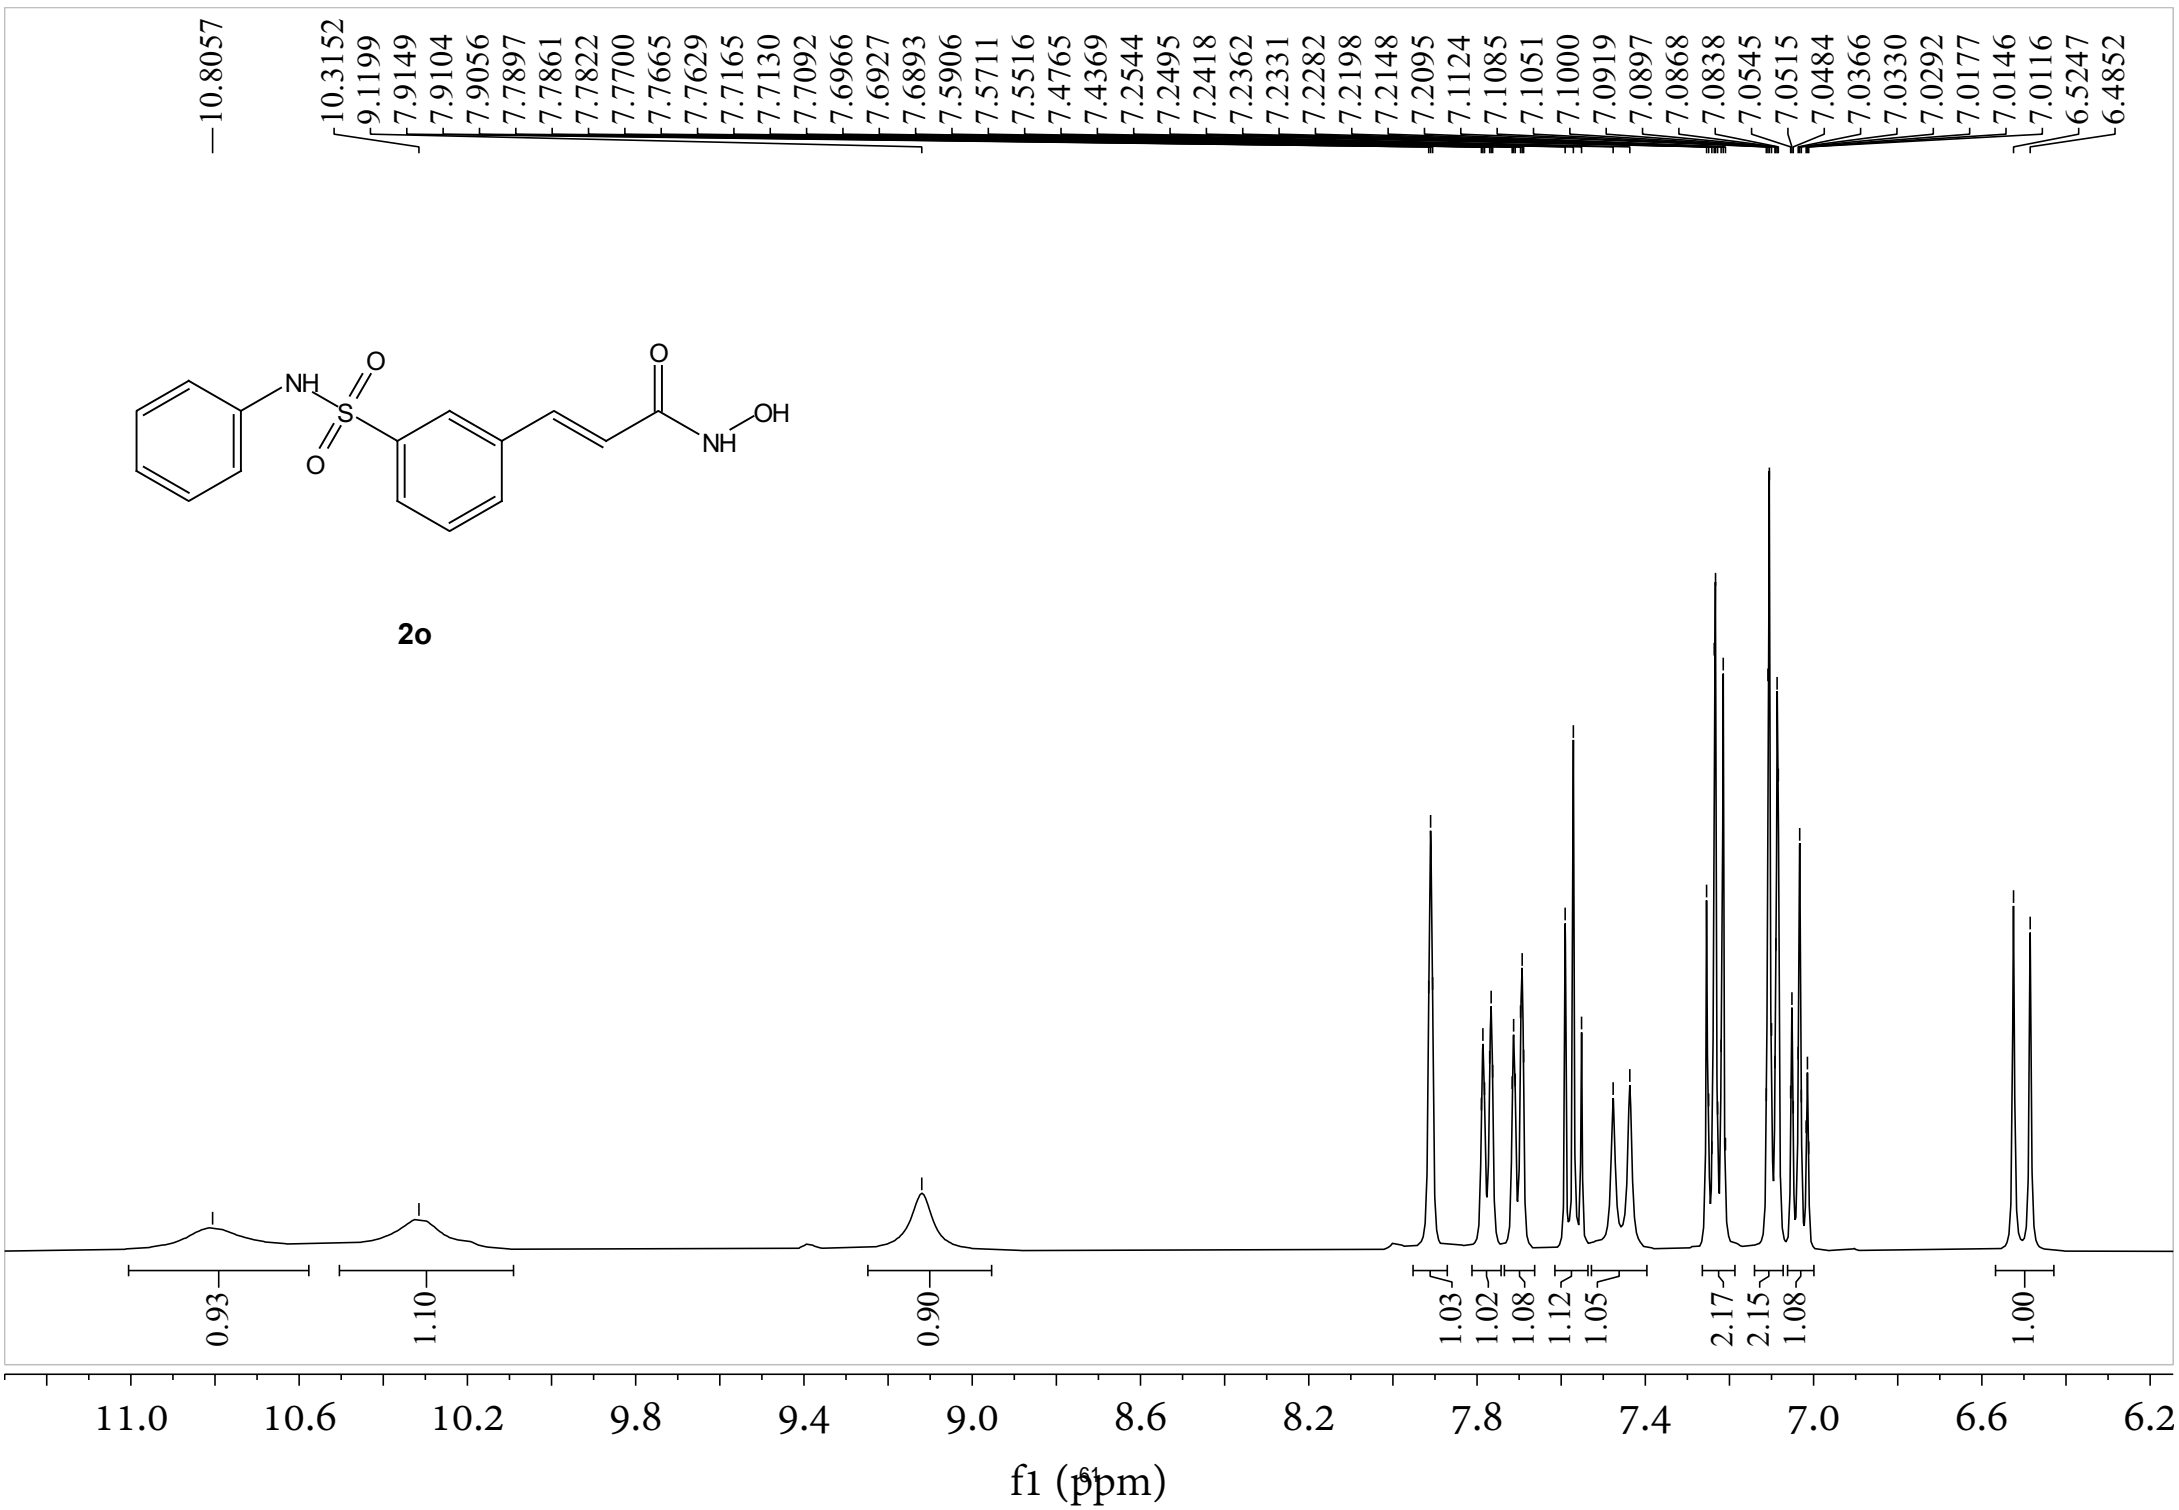

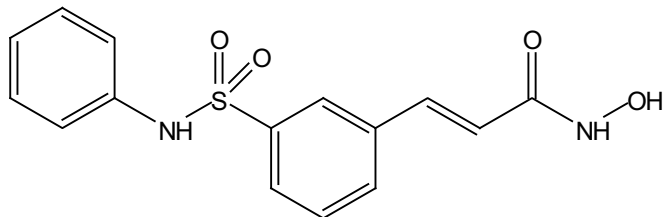

**2o**

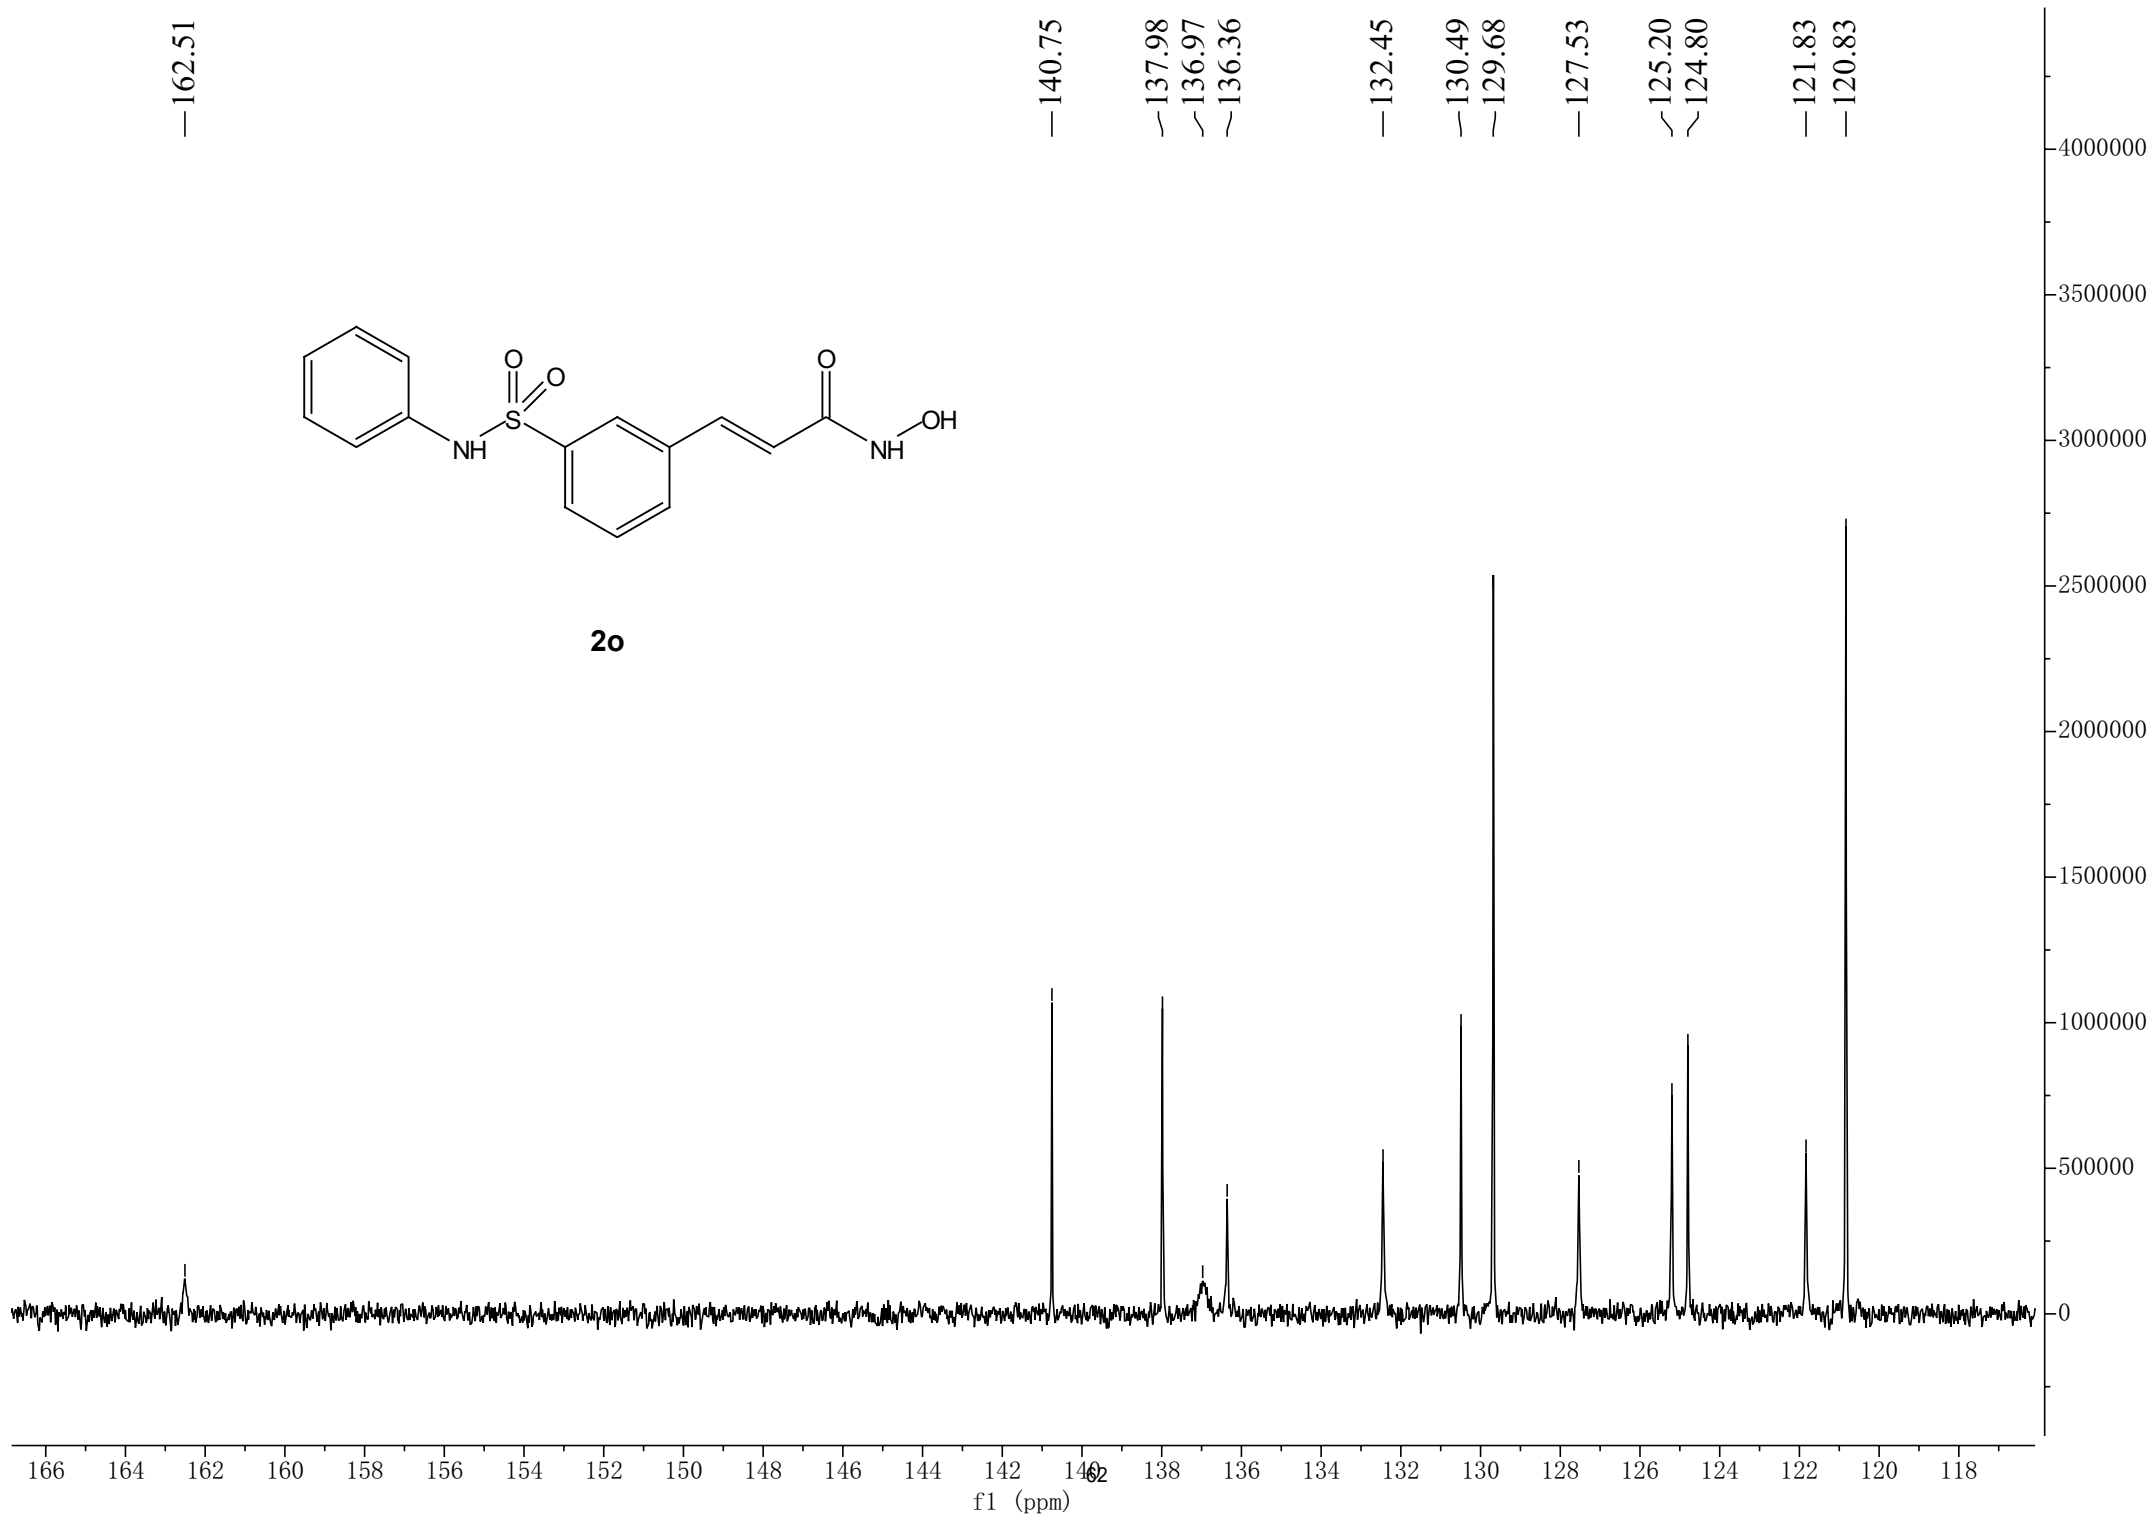

# Qualitative Analysis Report

|                               |              |                      |                      |
|-------------------------------|--------------|----------------------|----------------------|
| <b>Data Filename</b>          | H-19.d       | <b>Sample Name</b>   | H-19                 |
| <b>Sample Type</b>            | Sample       | <b>Position</b>      | P1-F3                |
| <b>Instrument Name</b>        | Instrument 1 | <b>User Name</b>     |                      |
| <b>Acq Method</b>             | FU100-1000.m | <b>Acquired Time</b> | 9/10/2021 8:50:53 PM |
| <b>IRM Calibration Status</b> | Success      | <b>DA Method</b>     | 20170311.m           |
| <b>Comment</b>                |              |                      |                      |

**Sample Group** Info.  
**Acquisition SW** 6200 series TOF/6500 series  
**Version** Q-TOF B.05.01 (B5125.2)

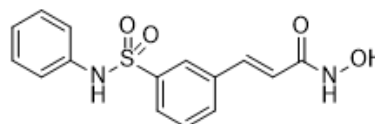

20

## User Spectra

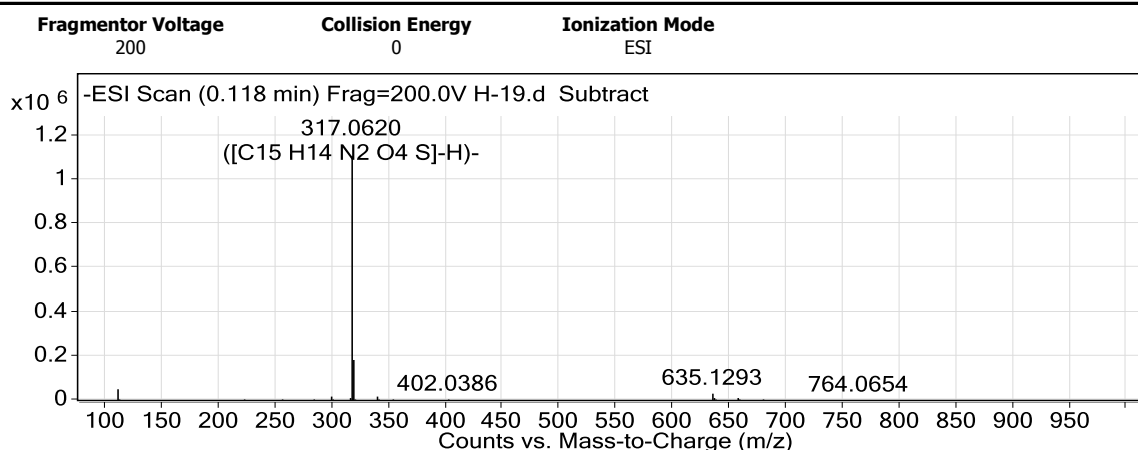

### Peak List

| m/z      | z | Abund      | Formula         | Ion    |
|----------|---|------------|-----------------|--------|
| 110.9759 | 1 | 52656.79   |                 |        |
| 299.05   | 1 | 22079.8    |                 |        |
| 316.0645 |   | 12206.38   |                 |        |
| 317.062  | 1 | 1107429.13 | C15 H14 N2 O4 S | (M-H)- |
| 318.0648 | 1 | 182631.23  | C15 H14 N2 O4 S | (M-H)- |
| 319.0615 | 1 | 55347.61   | C15 H14 N2 O4 S | (M-H)- |
| 339.2344 | 1 | 17058.5    |                 |        |
| 635.1293 | 1 | 31964.1    |                 |        |
| 636.1315 | 1 | 11691.43   |                 |        |
| 657.1118 | 1 | 13069.45   |                 |        |

### Formula Calculator Element Limits

| Element | Min | Max |
|---------|-----|-----|
| C       | 3   | 60  |
| H       | 0   | 120 |
| O       | 0   | 30  |
| N       | 0   | 30  |
| Cl      | 0   | 0   |
| F       | 0   | 0   |
| S       | 1   | 1   |

### Formula Calculator Results

| Formula         | Best  | Mass     | Tgt Mass | Diff (ppm) | Ion Species     | Score |
|-----------------|-------|----------|----------|------------|-----------------|-------|
| C15 H14 N2 O4 S | FALSE | 318.0693 | 318.0674 | -5.88      | C15 H13 N2 O4 S | 88.31 |

--- End Of Report ---

—11.2795

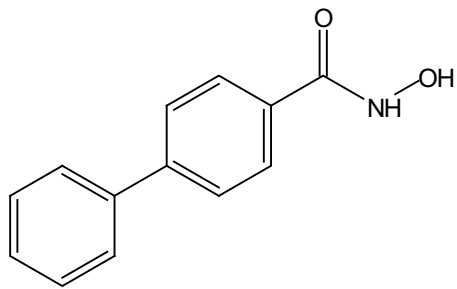

**2p**

—9.0658

7.8617  
7.8485  
7.7639  
7.7504  
7.7261  
7.7135  
7.5053  
7.4927  
7.4801  
7.4203  
7.4080  
7.3957

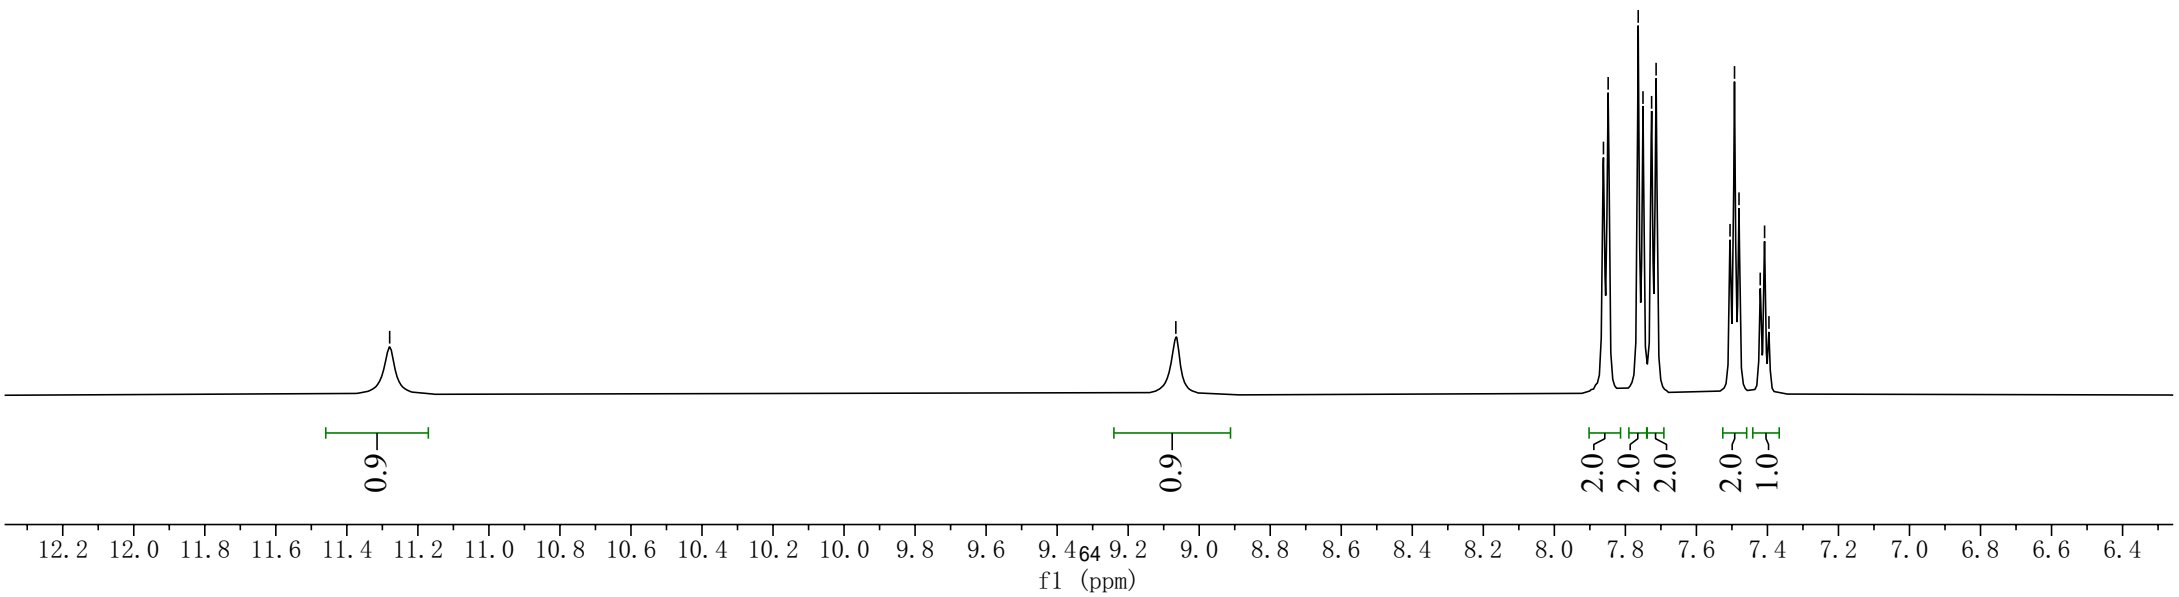



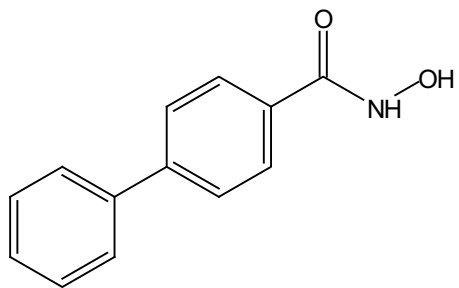

2p

—164.27

—143.09

—139.57

—131.98

129.43

128.43

127.91

127.23

127.00

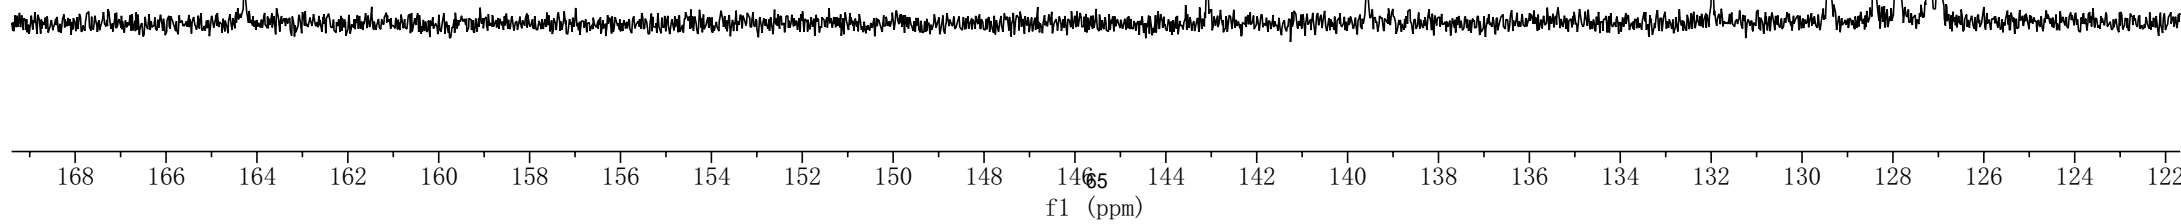

# Qualitative Analysis Report

|                               |              |                      |                      |
|-------------------------------|--------------|----------------------|----------------------|
| <b>Data Filename</b>          | H-6.d        | <b>Sample Name</b>   | H-6                  |
| <b>Sample Type</b>            | Sample       | <b>Position</b>      | P1-D8                |
| <b>Instrument Name</b>        | Instrument 1 | <b>User Name</b>     |                      |
| <b>Acq Method</b>             | FU100-1000.m | <b>Acquired Time</b> | 9/10/2021 8:12:42 PM |
| <b>IRM Calibration Status</b> | Success      | <b>DA Method</b>     | 20170311.m           |
| <b>Comment</b>                |              |                      |                      |

**Sample Group** Info.  
**Acquisition SW** 6200 series TOF/6500 series  
**Version** Q-TOF B.05.01 (B5125.2)

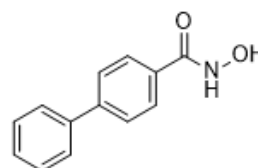

**2p**

## User Spectra

**Fragmentor Voltage** 200      **Collision Energy** 0      **Ionization Mode** ESI

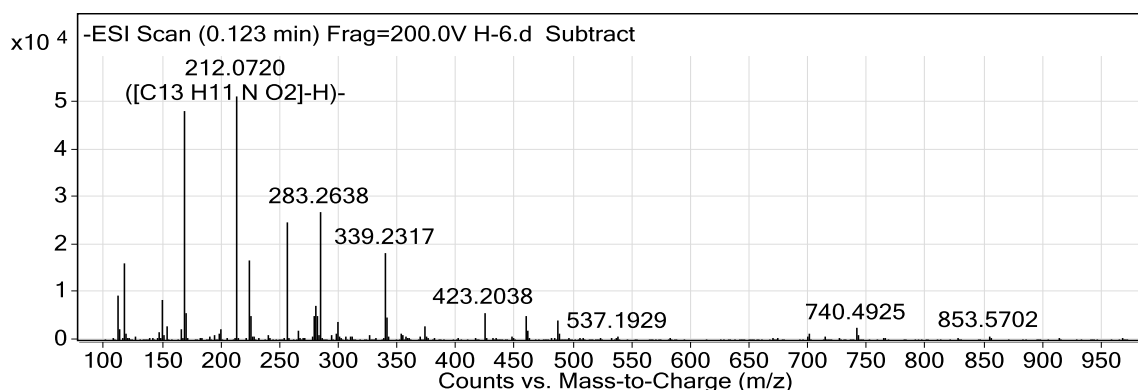

### Peak List

| m/z      | z | Abund    | Formula      | Ion    |
|----------|---|----------|--------------|--------|
| 110.9753 |   | 9583.14  |              |        |
| 117.0454 | 1 | 16289.46 |              |        |
| 149.0092 | 1 | 8452.67  |              |        |
| 168.0819 | 1 | 48064.19 |              |        |
| 212.072  | 1 | 51322.3  | C13 H11 N O2 | (M-H)- |
| 223.0286 | 1 | 16777.26 |              |        |
| 255.2332 | 1 | 24838.26 |              |        |
| 279.2324 | 1 | 7311.91  |              |        |
| 283.2638 | 1 | 27043.36 |              |        |
| 339.2317 | 1 | 18474.16 |              |        |

### Formula Calculator Element Limits

| Element | Min | Max |
|---------|-----|-----|
| C       | 3   | 60  |
| H       | 0   | 120 |
| O       | 0   | 30  |
| N       | 0   | 30  |
| Cl      | 0   | 0   |
| F       | 0   | 0   |
| S       | 0   | 0   |
| Br      | 0   | 0   |

### Formula Calculator Results

| Formula      | Best | Mass     | Tgt Mass | Diff (ppm) | Ion Species  | Score |
|--------------|------|----------|----------|------------|--------------|-------|
| C13 H11 N O2 | TRUE | 213.0792 | 213.079  | -0.87      | C13 H10 N O2 | 97.91 |

--- End Of Report ---

—10.76

—9.05

7.78  
7.76

7.41  
7.37  
7.35

6.50  
6.46

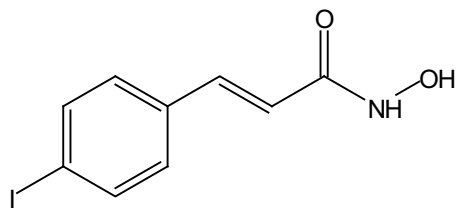

**2q**

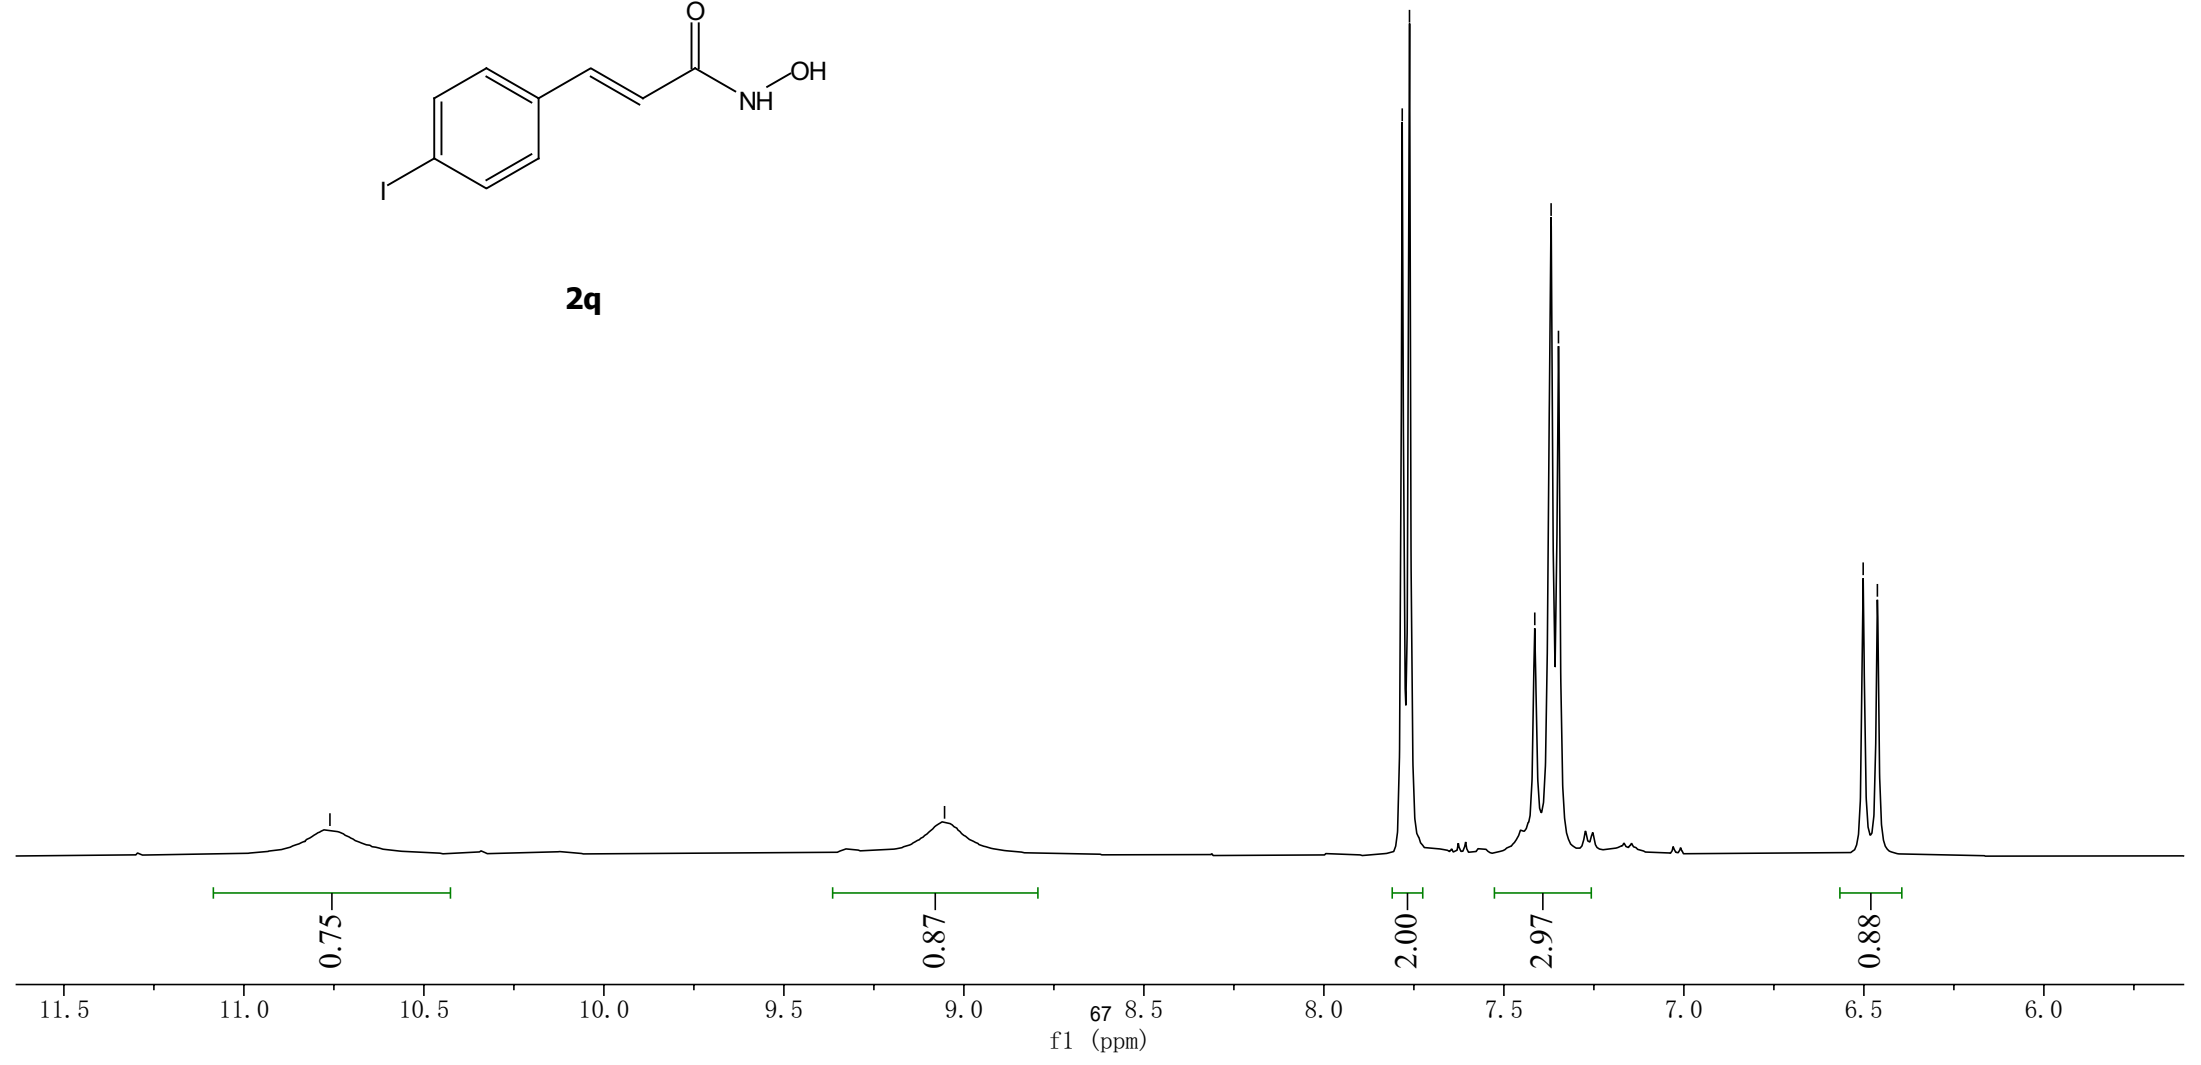

—162.84

—138.22

—137.73

—134.91

—129.89

—120.39

—96.81

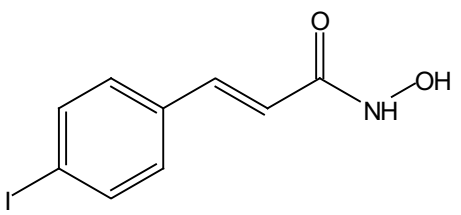

**2q**

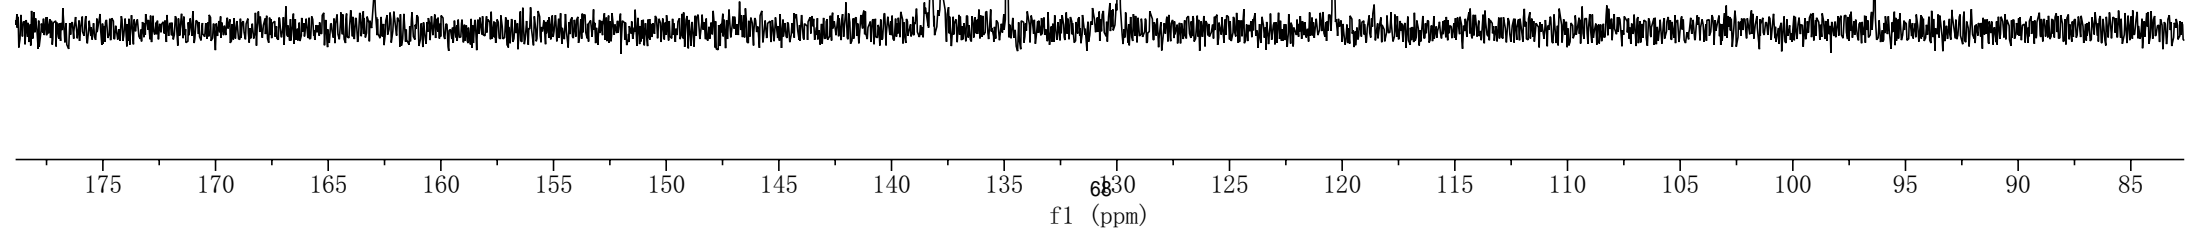

# Qualitative Analysis Report

**Data Filename** H-13.d **Sample Name** H-13  
**Sample Type** Sample **Position** P1-E6  
**Instrument Name** Instrument 1 **User Name**  
**Acq Method** FU100-1000.m **Acquired Time** 9/10/2021 8:33:16 PM  
**IRM Calibration Status** Success **DA Method** 20170311.m  
**Comment**

**Sample Group** **Info.**  
**Acquisition SW** 6200 series TOF/6500 series  
**Version** Q-TOF B.05.01 (B5125.2)

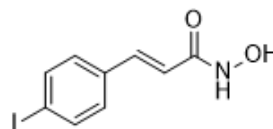

2q

## User Spectra

**Fragmentor Voltage** 200 **Collision Energy** 0 **Ionization Mode** ESI

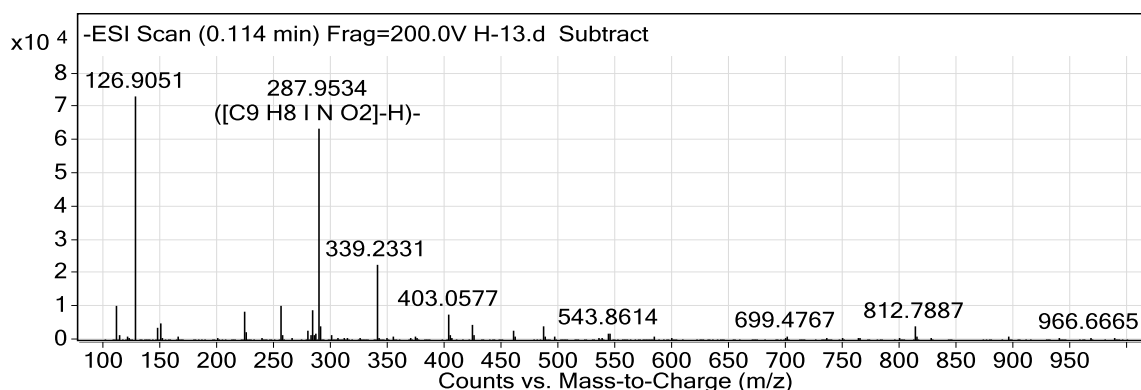

## Peak List

| m/z      | z | Abund    | Formula      | Ion    |
|----------|---|----------|--------------|--------|
| 110.9761 |   | 10625.62 |              |        |
| 126.9051 |   | 73356    |              |        |
| 223.029  | 1 | 8786.01  |              |        |
| 255.2331 | 1 | 10344.08 |              |        |
| 283.2654 | 1 | 9097.98  |              |        |
| 287.9534 | 1 | 63628.27 | C9 H8 I N O2 | (M-H)- |
| 288.9557 | 1 | 6185.24  | C9 H8 I N O2 | (M-H)- |
| 339.2331 | 1 | 22716.29 |              |        |
| 340.2358 | 1 | 5732.13  |              |        |
| 403.0577 | 1 | 7799.41  |              |        |

## Formula Calculator Element Limits

| Element | Min | Max |
|---------|-----|-----|
| C       | 3   | 60  |
| H       | 0   | 120 |
| O       | 0   | 30  |
| N       | 0   | 30  |
| Cl      | 0   | 0   |
| F       | 0   | 0   |
| Br      | 0   | 0   |
| I       | 1   | 1   |

## Formula Calculator Results

| Formula      | Best | Mass     | Tgt Mass | Diff (ppm) | Ion Species  | Score |
|--------------|------|----------|----------|------------|--------------|-------|
| C9 H8 I N O2 | TRUE | 288.9606 | 288.96   | -2.1       | C9 H7 I N O2 | 85.37 |

--- End Of Report ---

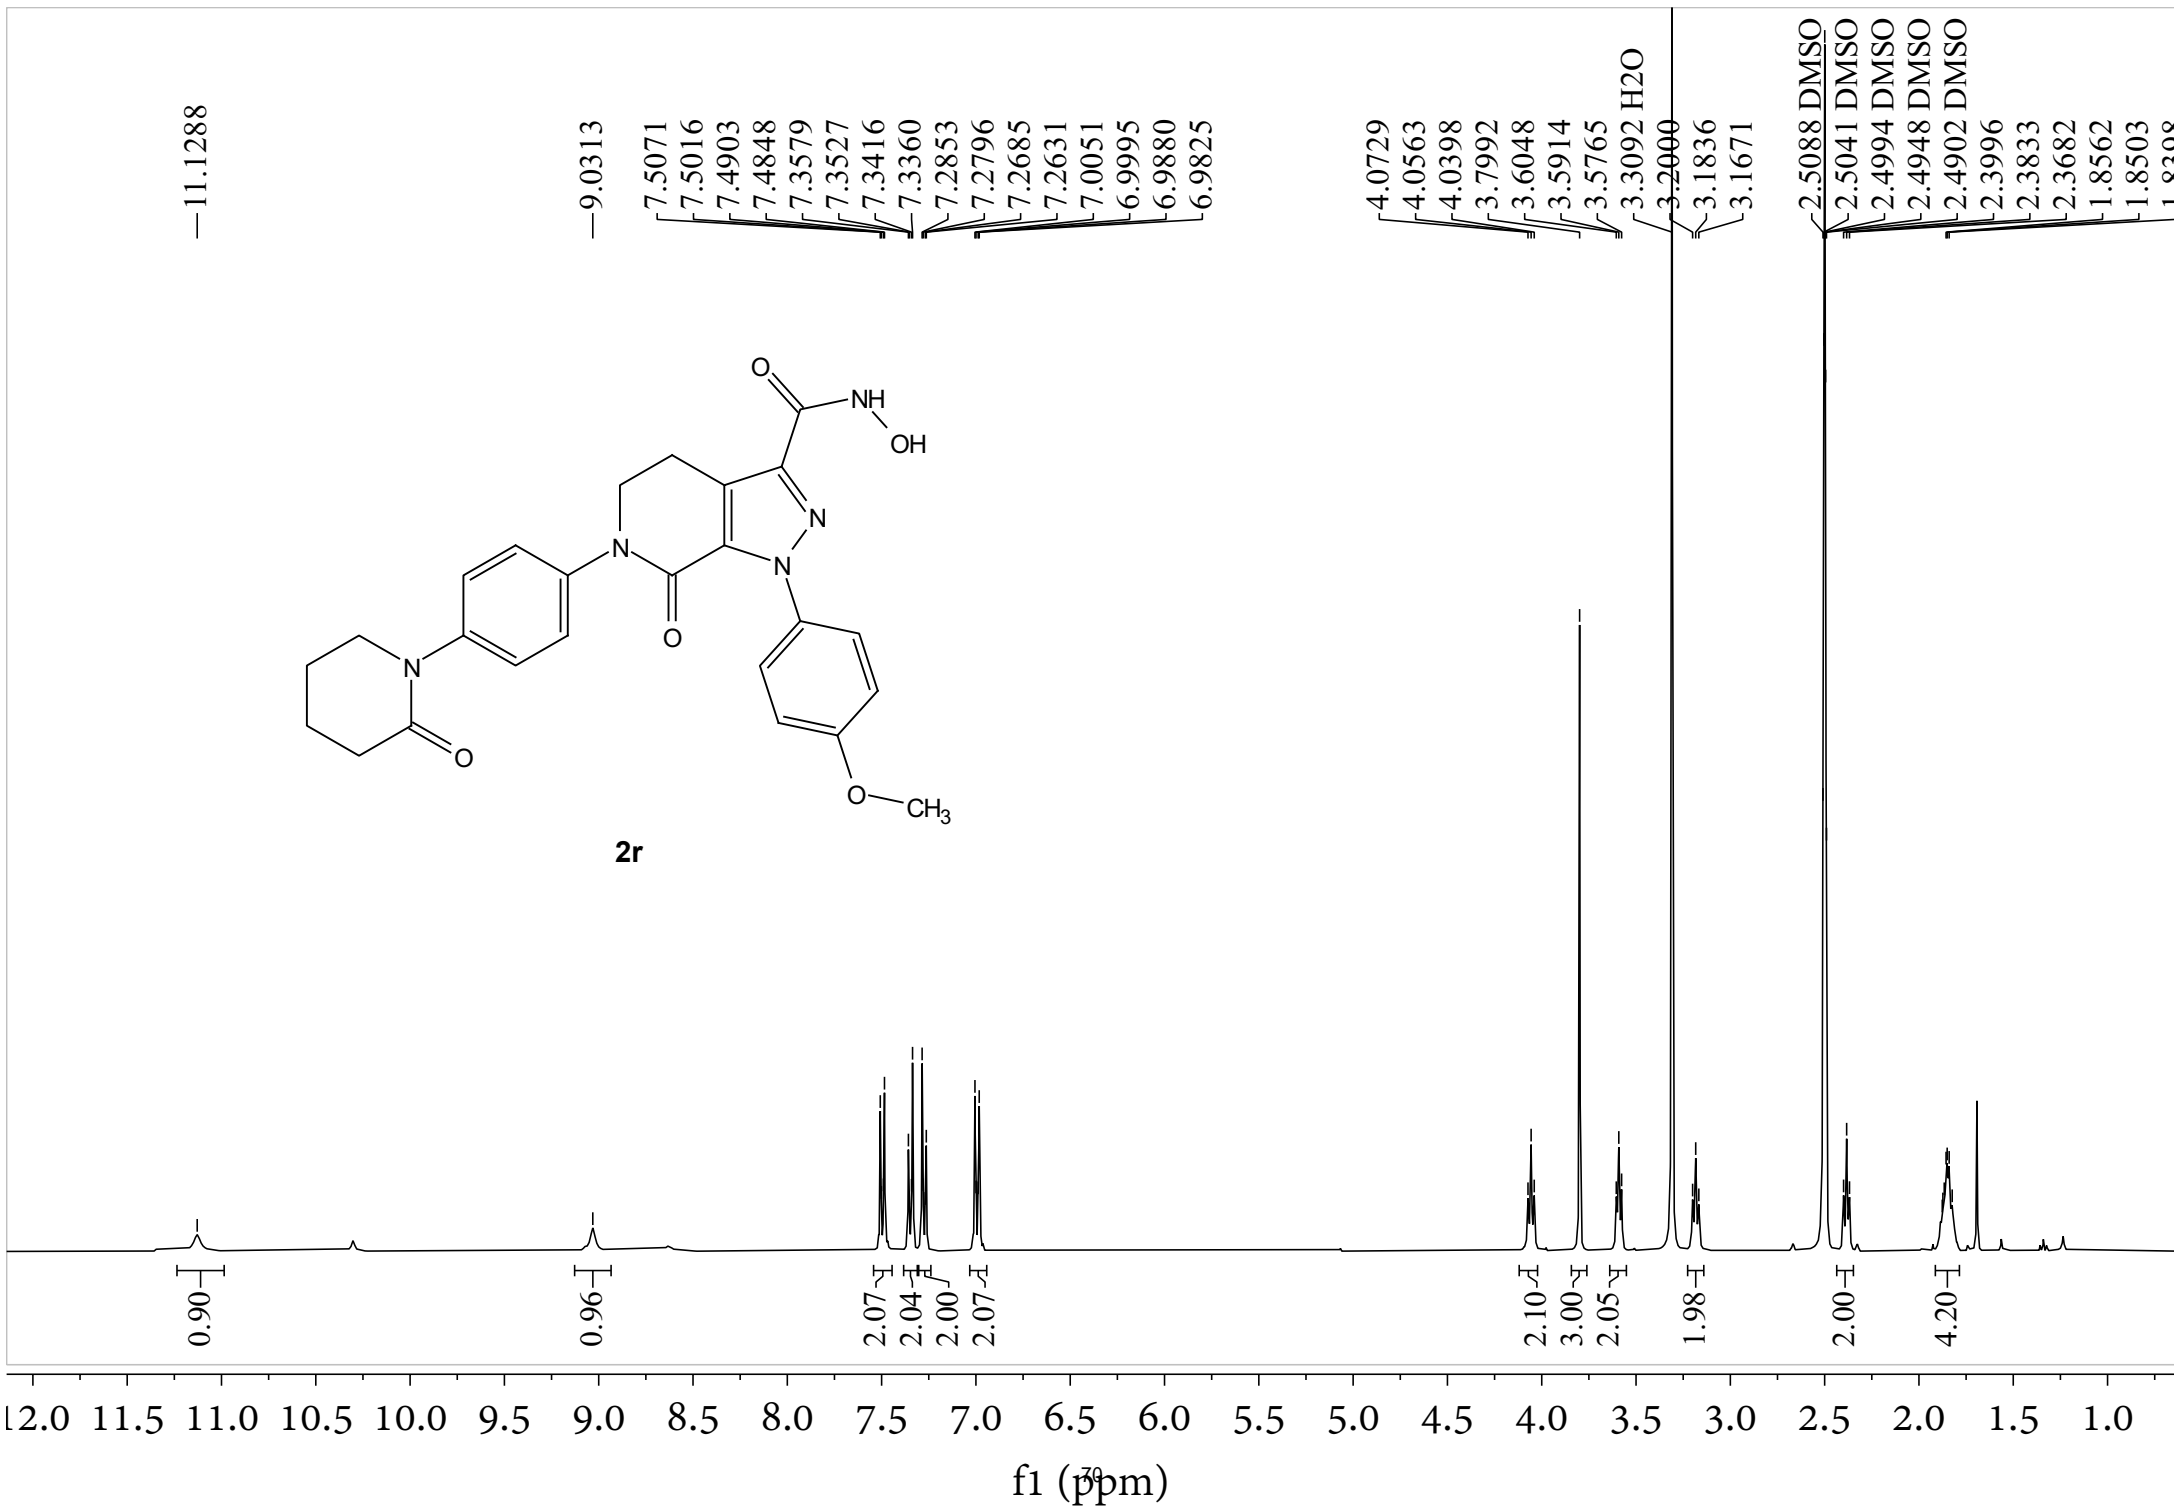

—169.33  
—166.58

—159.60  
—157.05

141.89  
140.73  
140.29  
133.10  
133.00  
127.24  
126.81  
126.50  
125.50

—113.87

55.95  
51.38  
51.30

—33.06

23.47  
21.36  
21.30

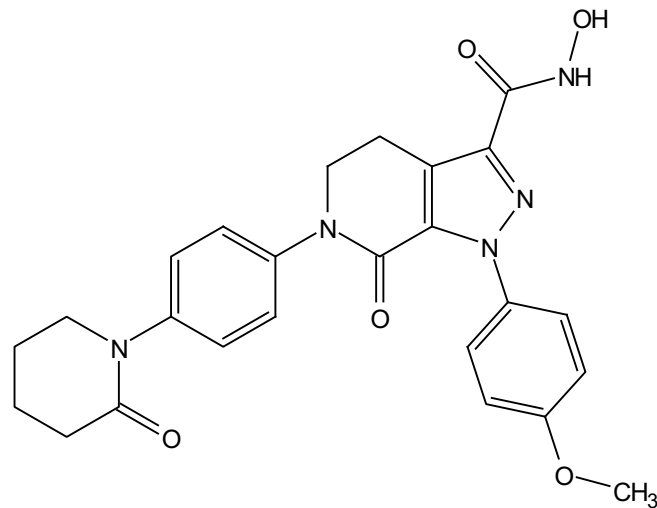

2r

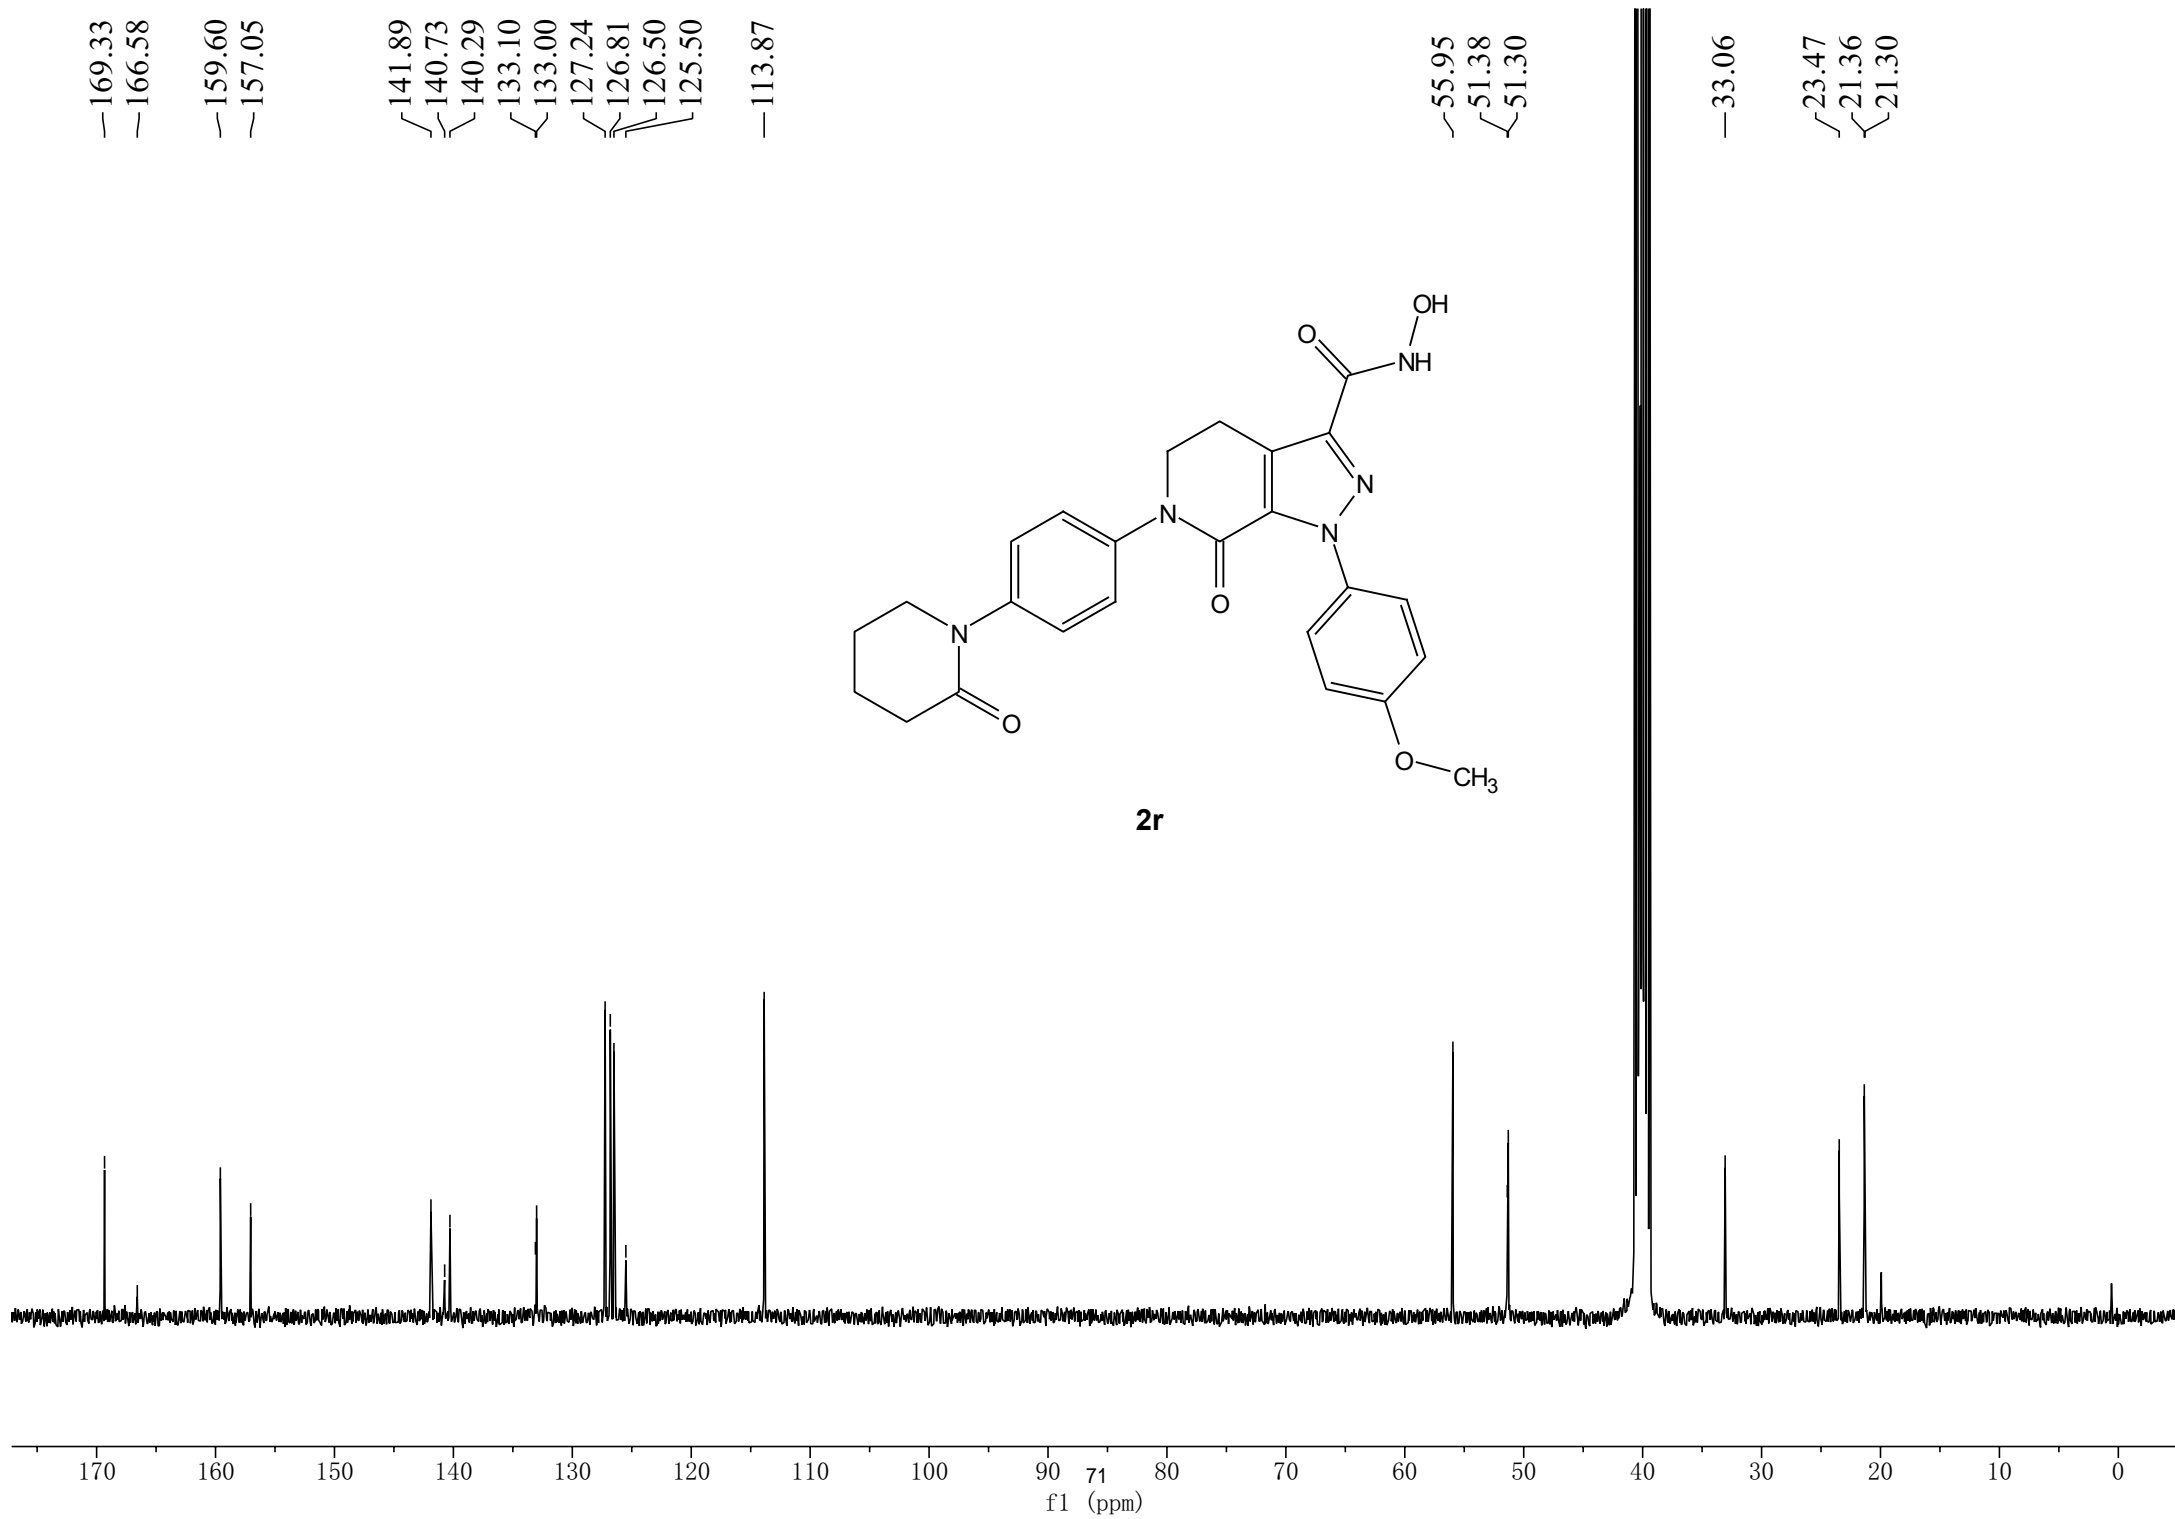

# Qualitative Analysis Report

**Data Filename** H-22.d **Sample Name** H-22  
**Sample Type** Sample **Position** P1-F6  
**Instrument Name** Instrument 1 **User Name**  
**Acq Method** FU100-1000.m **Acquired Time** 9/10/2021 8:59:44 PM  
**IRM Calibration Status** Success **DA Method** 20170311.m  
**Comment**

**Sample Group** **Info.**  
**Acquisition SW** 6200 series TOF/6500 series  
**Version** Q-TOF B.05.01 (B5125.2)

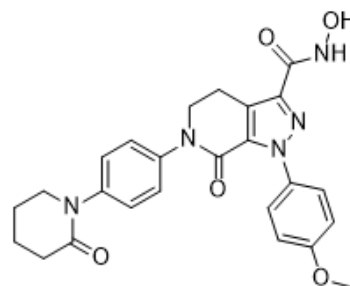

2r

## User Spectra

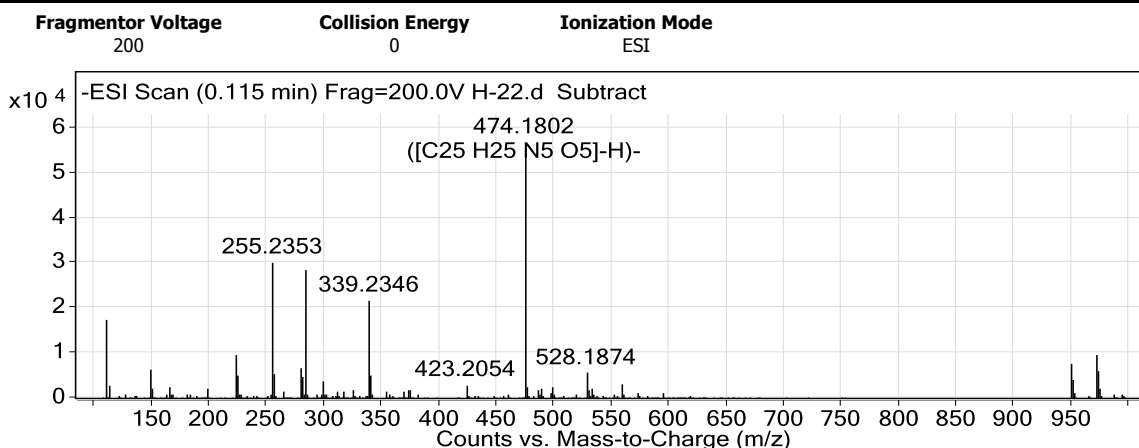

## Peak List

| m/z      | z | Abund    | Formula                                                       | Ion    |
|----------|---|----------|---------------------------------------------------------------|--------|
| 110.9766 |   | 17355.73 |                                                               |        |
| 223.0308 | 1 | 9731.65  |                                                               |        |
| 255.2353 | 1 | 30286.4  |                                                               |        |
| 279.2348 | 1 | 6716.57  |                                                               |        |
| 283.2662 | 1 | 28397.63 |                                                               |        |
| 339.2346 | 1 | 21822.67 |                                                               |        |
| 474.1802 | 1 | 54208.09 | C <sub>25</sub> H <sub>25</sub> N <sub>5</sub> O <sub>5</sub> | (M-H)- |
| 475.1833 | 1 | 14811.93 | C <sub>25</sub> H <sub>25</sub> N <sub>5</sub> O <sub>5</sub> | (M-H)- |
| 949.3683 | 1 | 7759.95  |                                                               |        |
| 971.3494 | 1 | 9864.75  |                                                               |        |

## Formula Calculator Element Limits

| Element | Min | Max |
|---------|-----|-----|
| C       | 3   | 60  |
| H       | 0   | 120 |
| O       | 0   | 30  |
| N       | 0   | 30  |
| Cl      | 0   | 0   |
| F       | 0   | 0   |

## Formula Calculator Results

| Formula                                                       | Best  | Mass     | Tgt Mass | Diff (ppm) | Ion Species                                                   | Score |
|---------------------------------------------------------------|-------|----------|----------|------------|---------------------------------------------------------------|-------|
| C <sub>25</sub> H <sub>25</sub> N <sub>5</sub> O <sub>5</sub> | FALSE | 475.1875 | 475.1856 | -4.05      | C <sub>25</sub> H <sub>24</sub> N <sub>5</sub> O <sub>5</sub> | 91.69 |

--- End Of Report ---



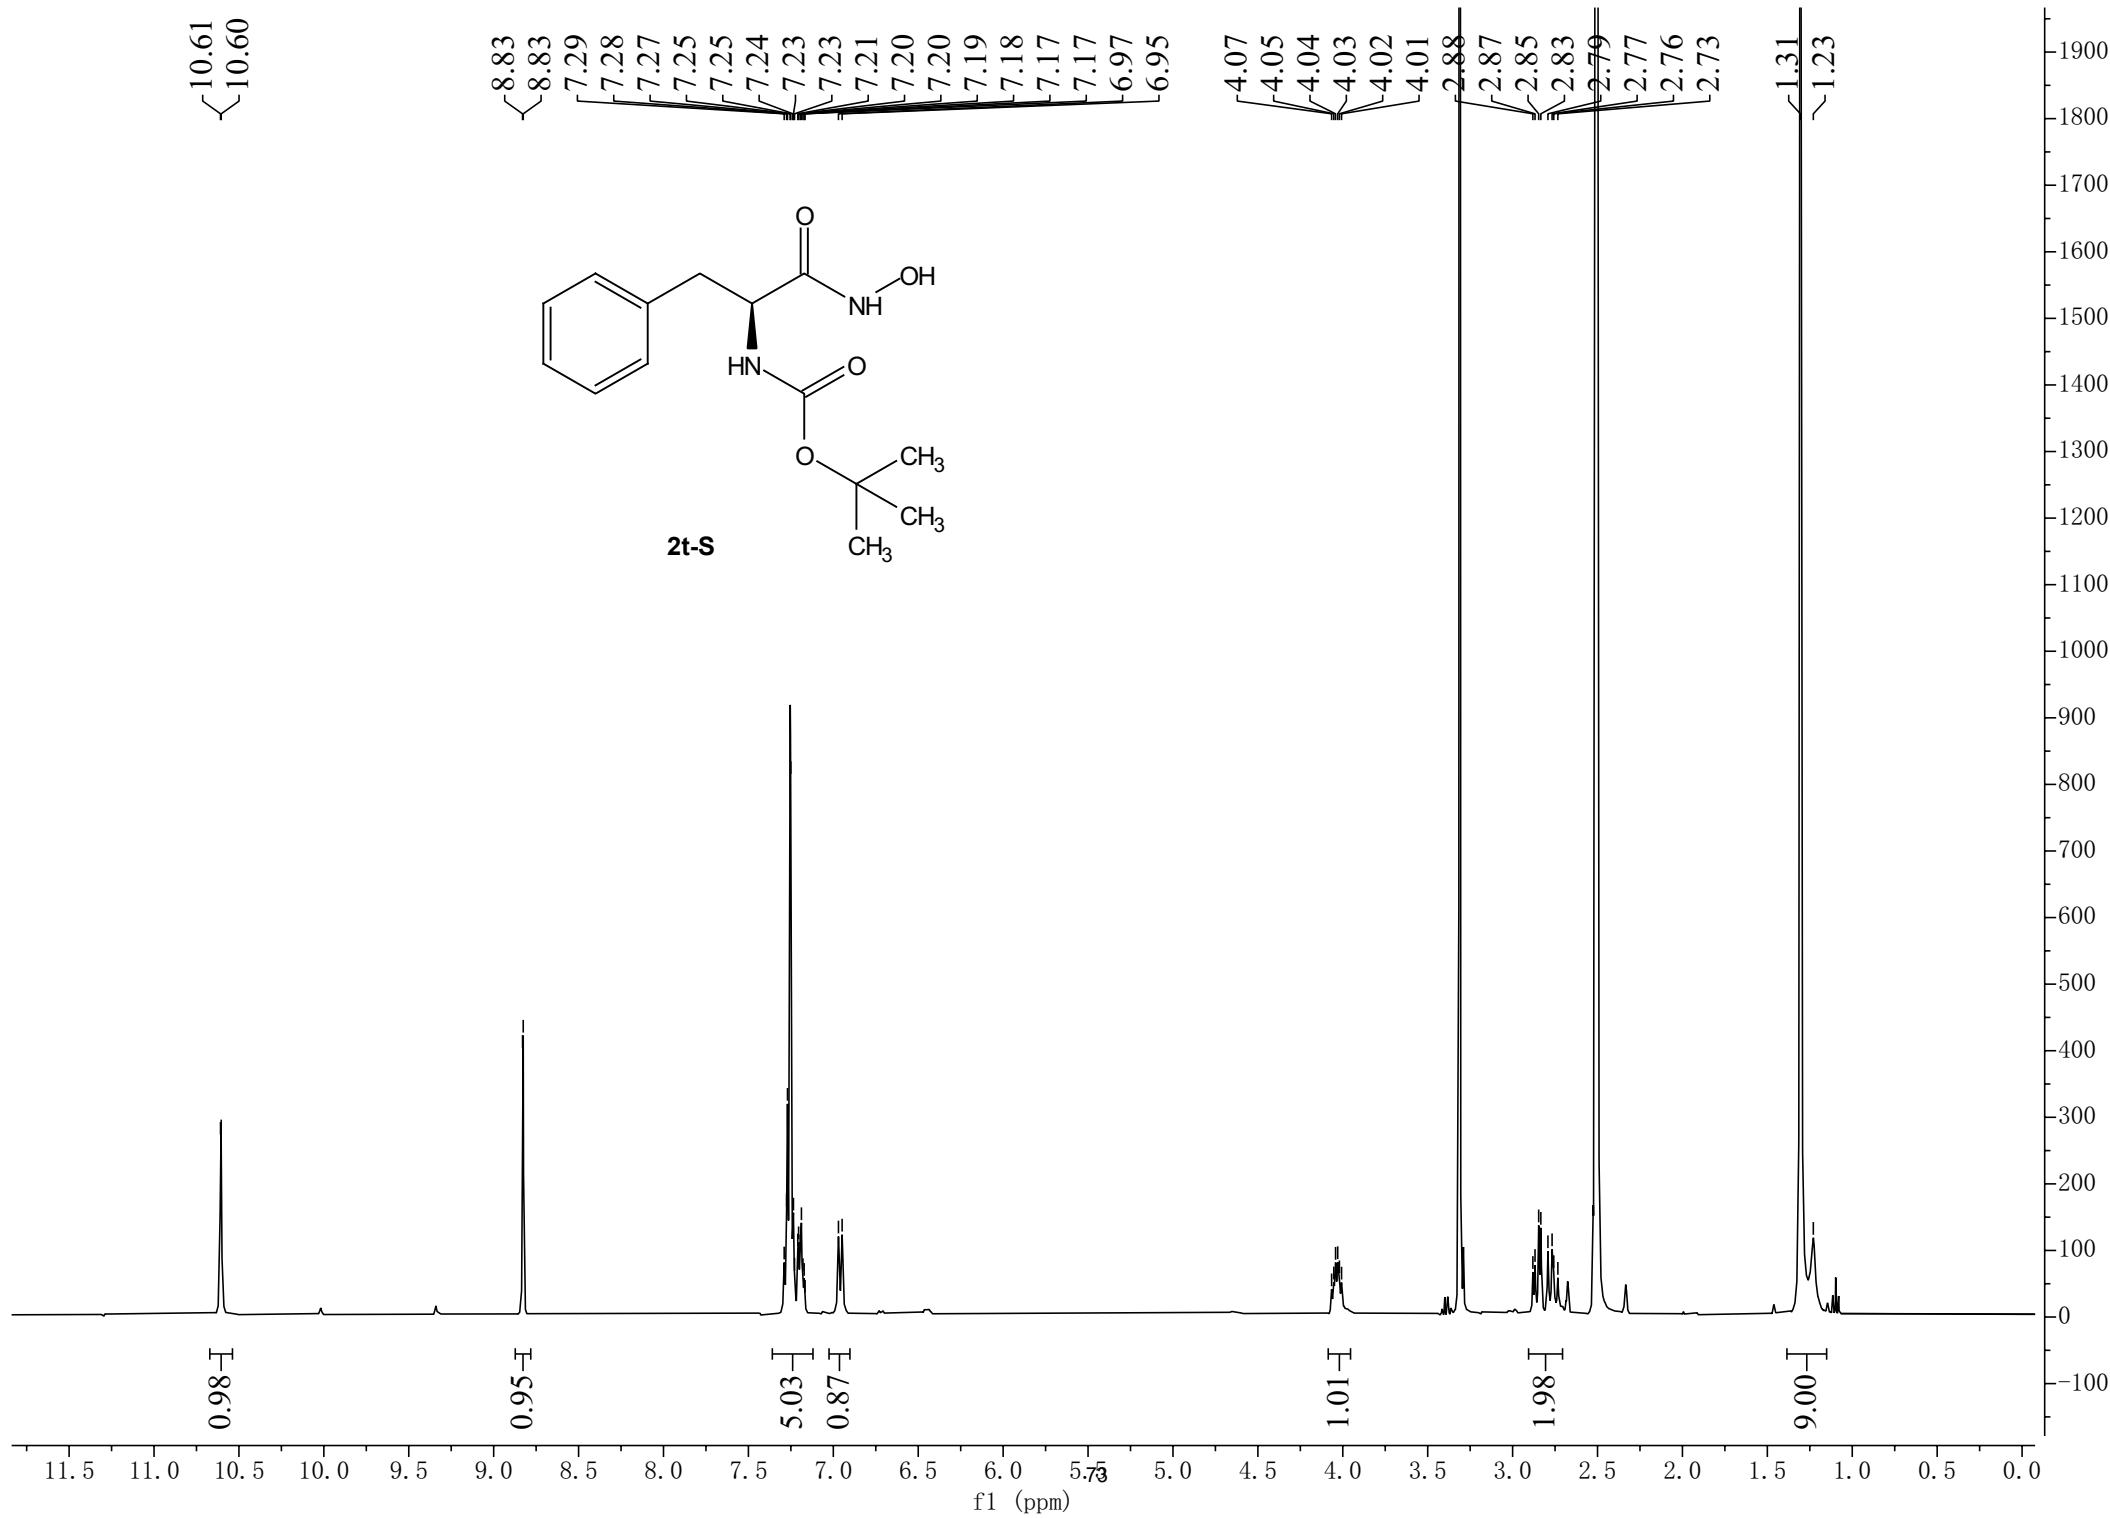

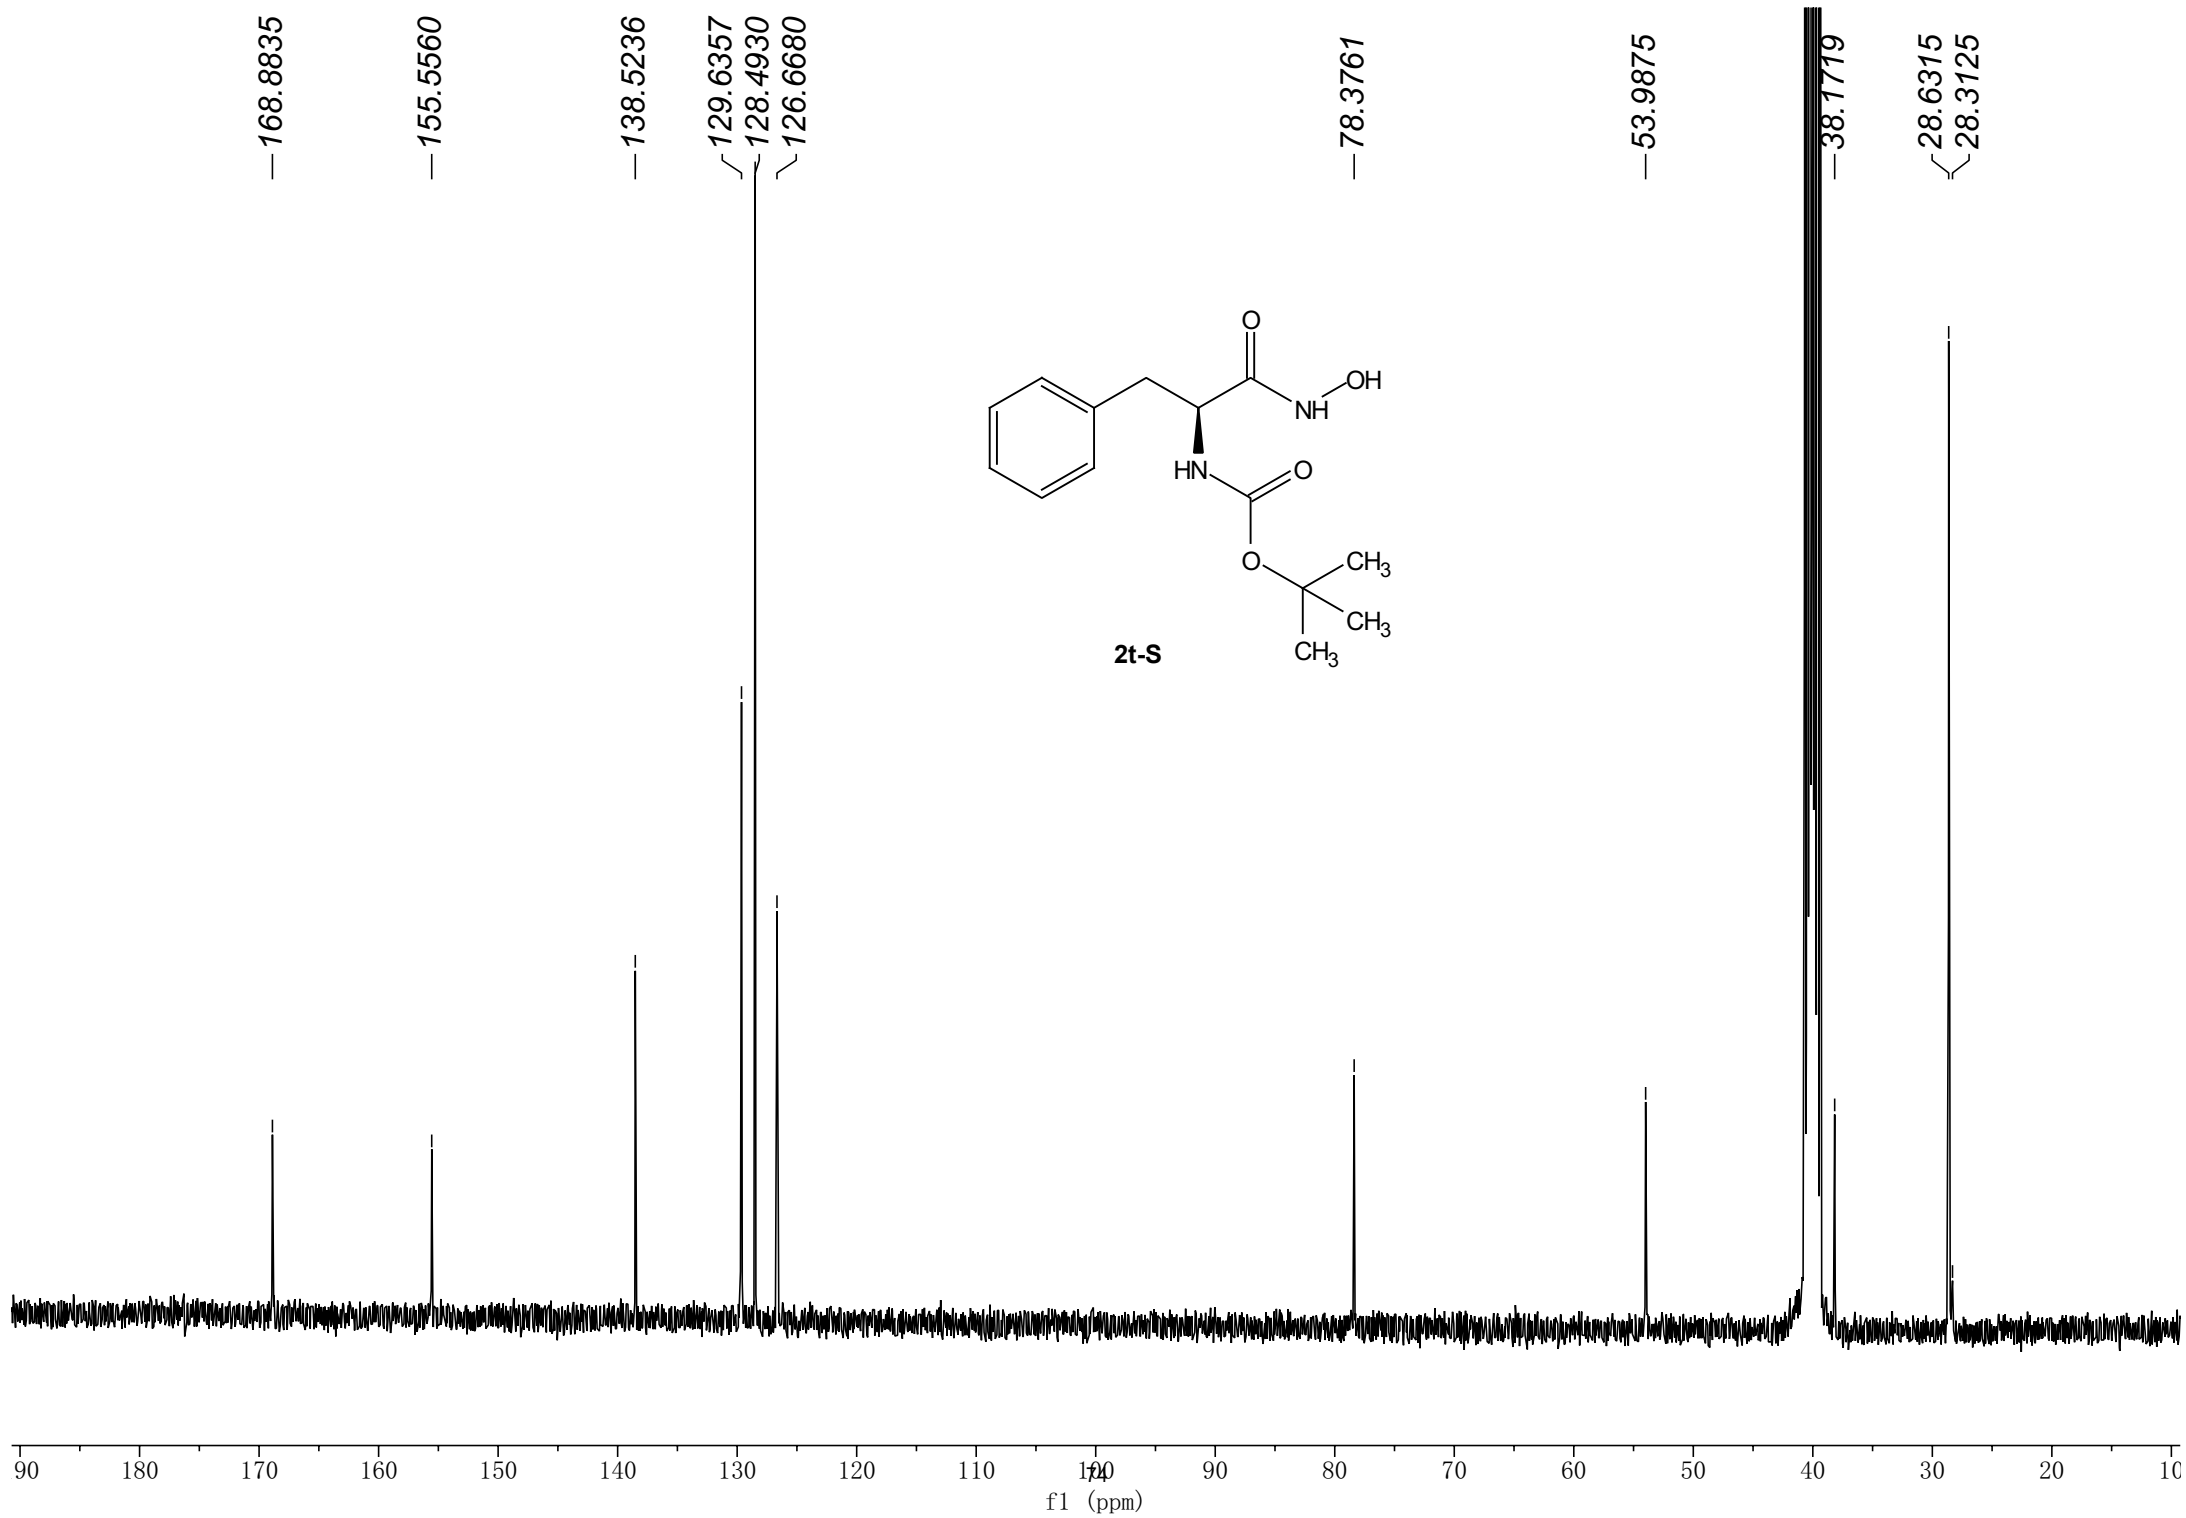

数据文件: : E:\DATA\DEF\_LC1 2022-12-31 01-33-42\017-0701.D

样品名称 : PHE-NHOH-S

=====

操作者 : 序列行 : 7  
仪器 : 仪器 1 位置 : 样品瓶 17  
进样日期 : 2022/12/31 2:15:58 进样次数 : 1  
进样量 : 5.000  $\mu$ l  
采集方法 : E:\DATA\DEF\_LC1 2022-12-31 01-33-42\100TO1000P\_AND\_N.M  
最后修改 : 2021/4/17 14:18:09  
分析方法 : C:\CHEM32\1\METHODS\100TO1000P\_AND\_N.M  
最后修改 : 2022/12/1 16:12:04  
(调用后修改)  
方法信息 : 2080F

## MS Spectrum

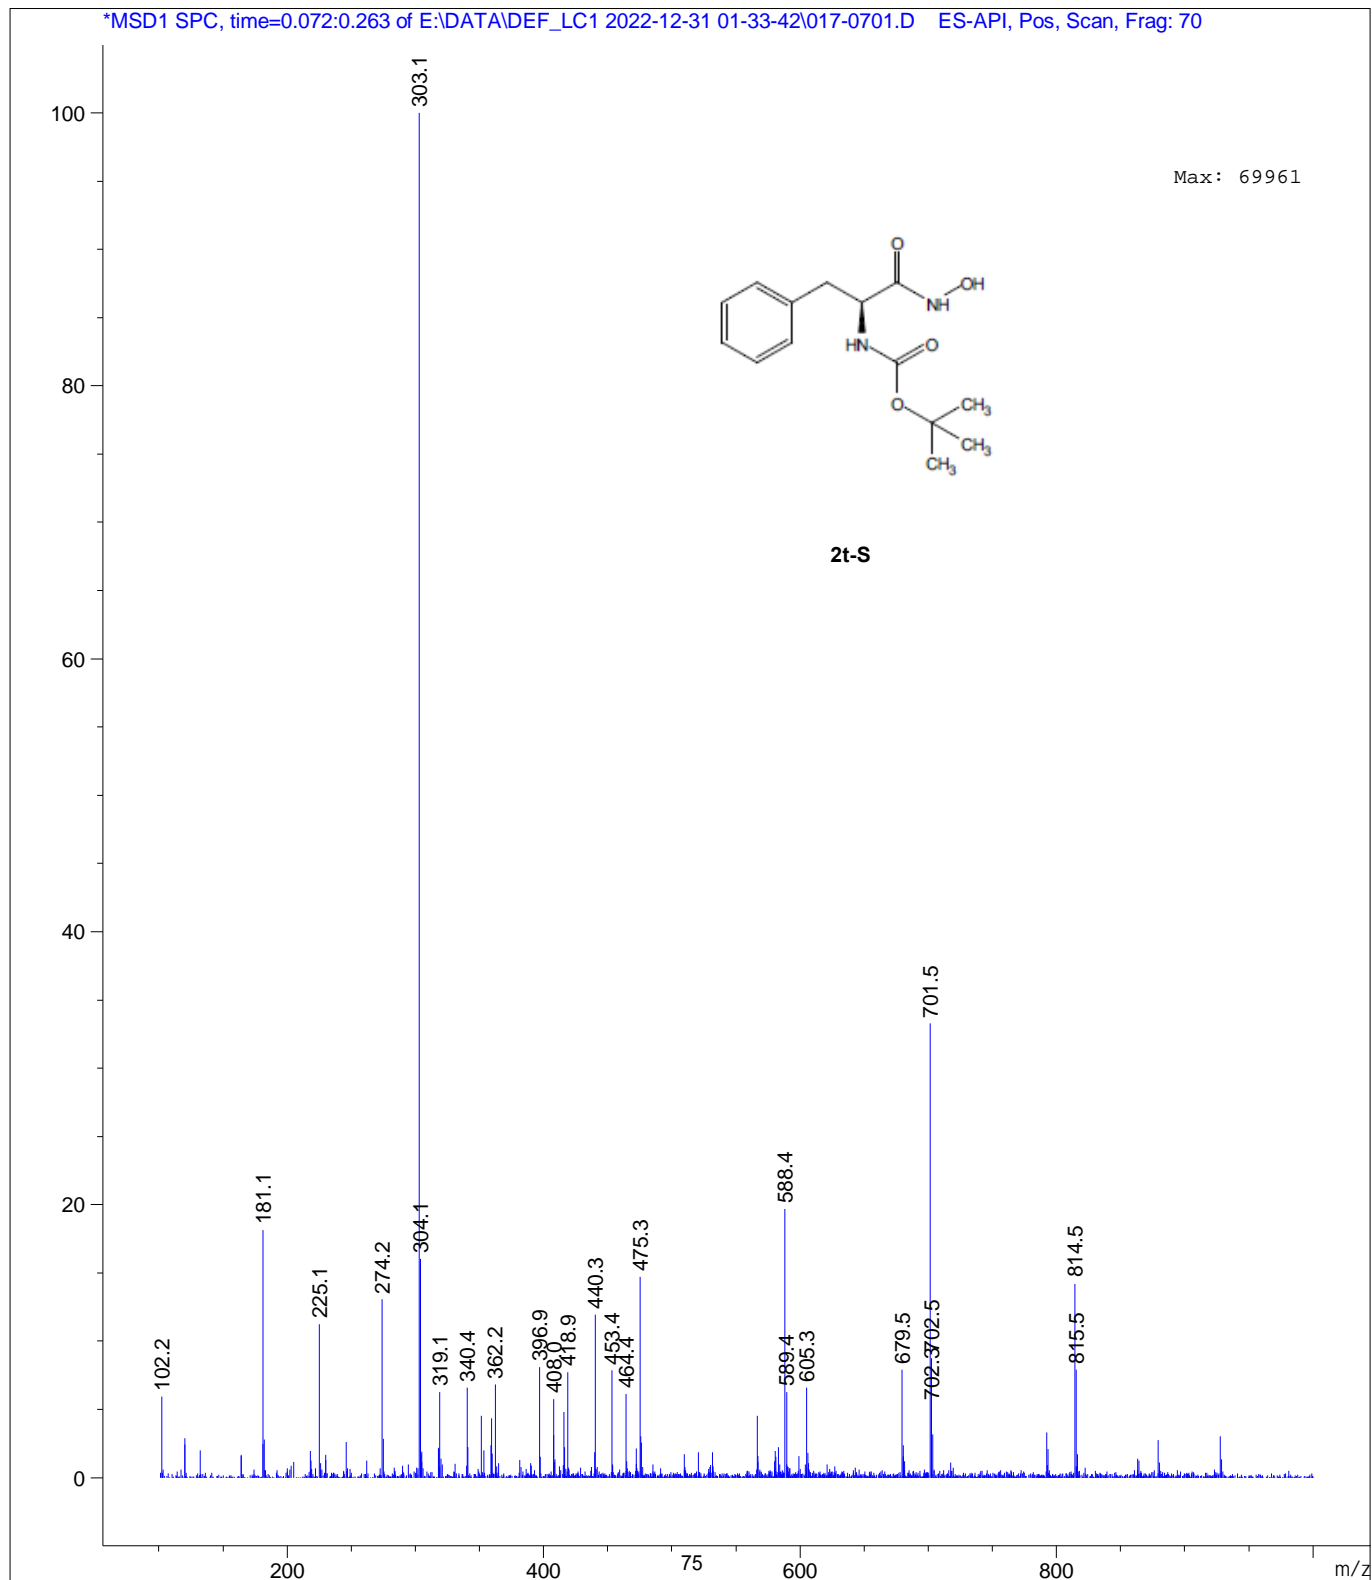

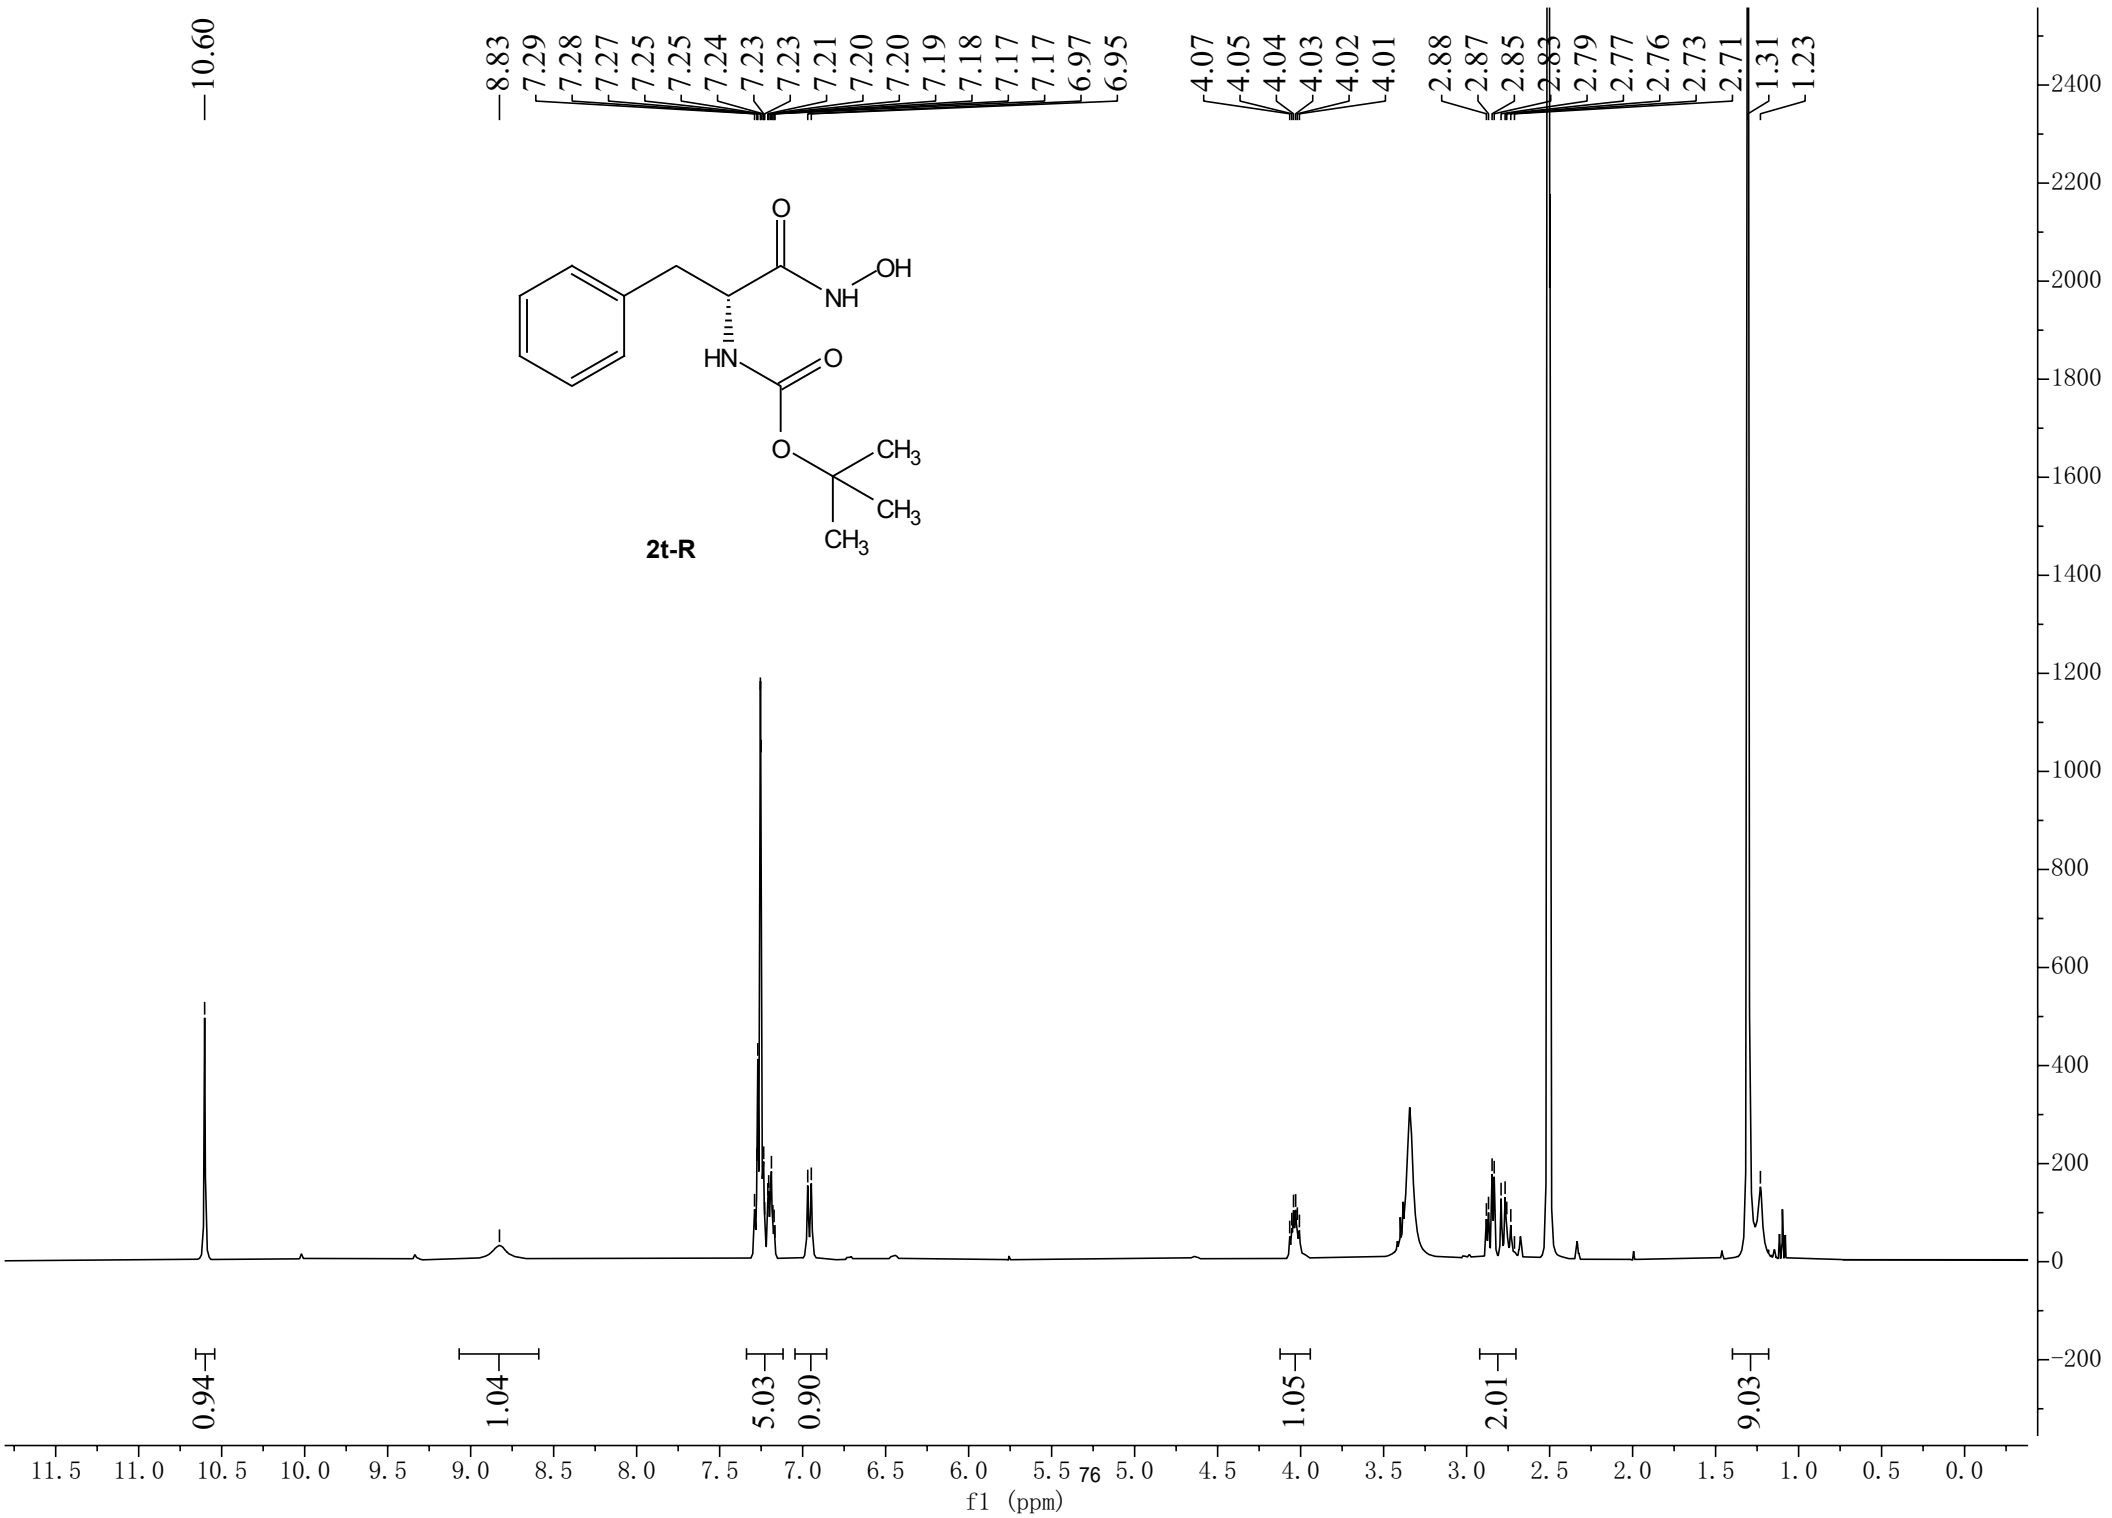

—168.8795

—155.5550

—138.5192

∩129.6342

∩128.4944

∩126.6680

—78.3800

—53.9832

—38.1766

∩28.6315

∩28.3185

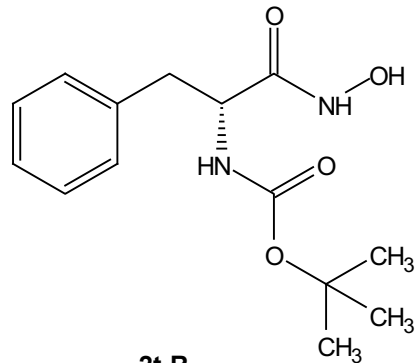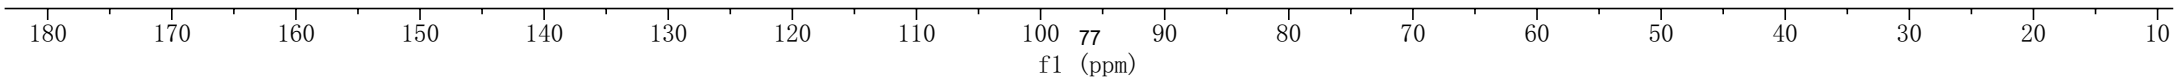

数据文件: : E:\DATA\DEF\_LC1 2022-12-31 01-33-42\018-0801.D

样品名称 : PHE-NHOH-R

=====

操作者 : 序列行 : 8  
仪器 : 仪器 1 位置 : 样品瓶 18  
进样日期 : 2022/12/31 2:22:36 进样次数 : 1  
进样量 : 5.000 µl

采集方法 : E:\DATA\DEF\_LC1 2022-12-31 01-33-42\100TO1000P\_AND\_N.M  
最后修改 : 2021/4/17 14:18:09  
分析方法 : C:\CHEM32\1\METHODS\100TO1000P\_AND\_N.M  
最后修改 : 2022/12/1 16:12:04  
(调用后修改)

方法信息 : 2080F

## MS Spectrum

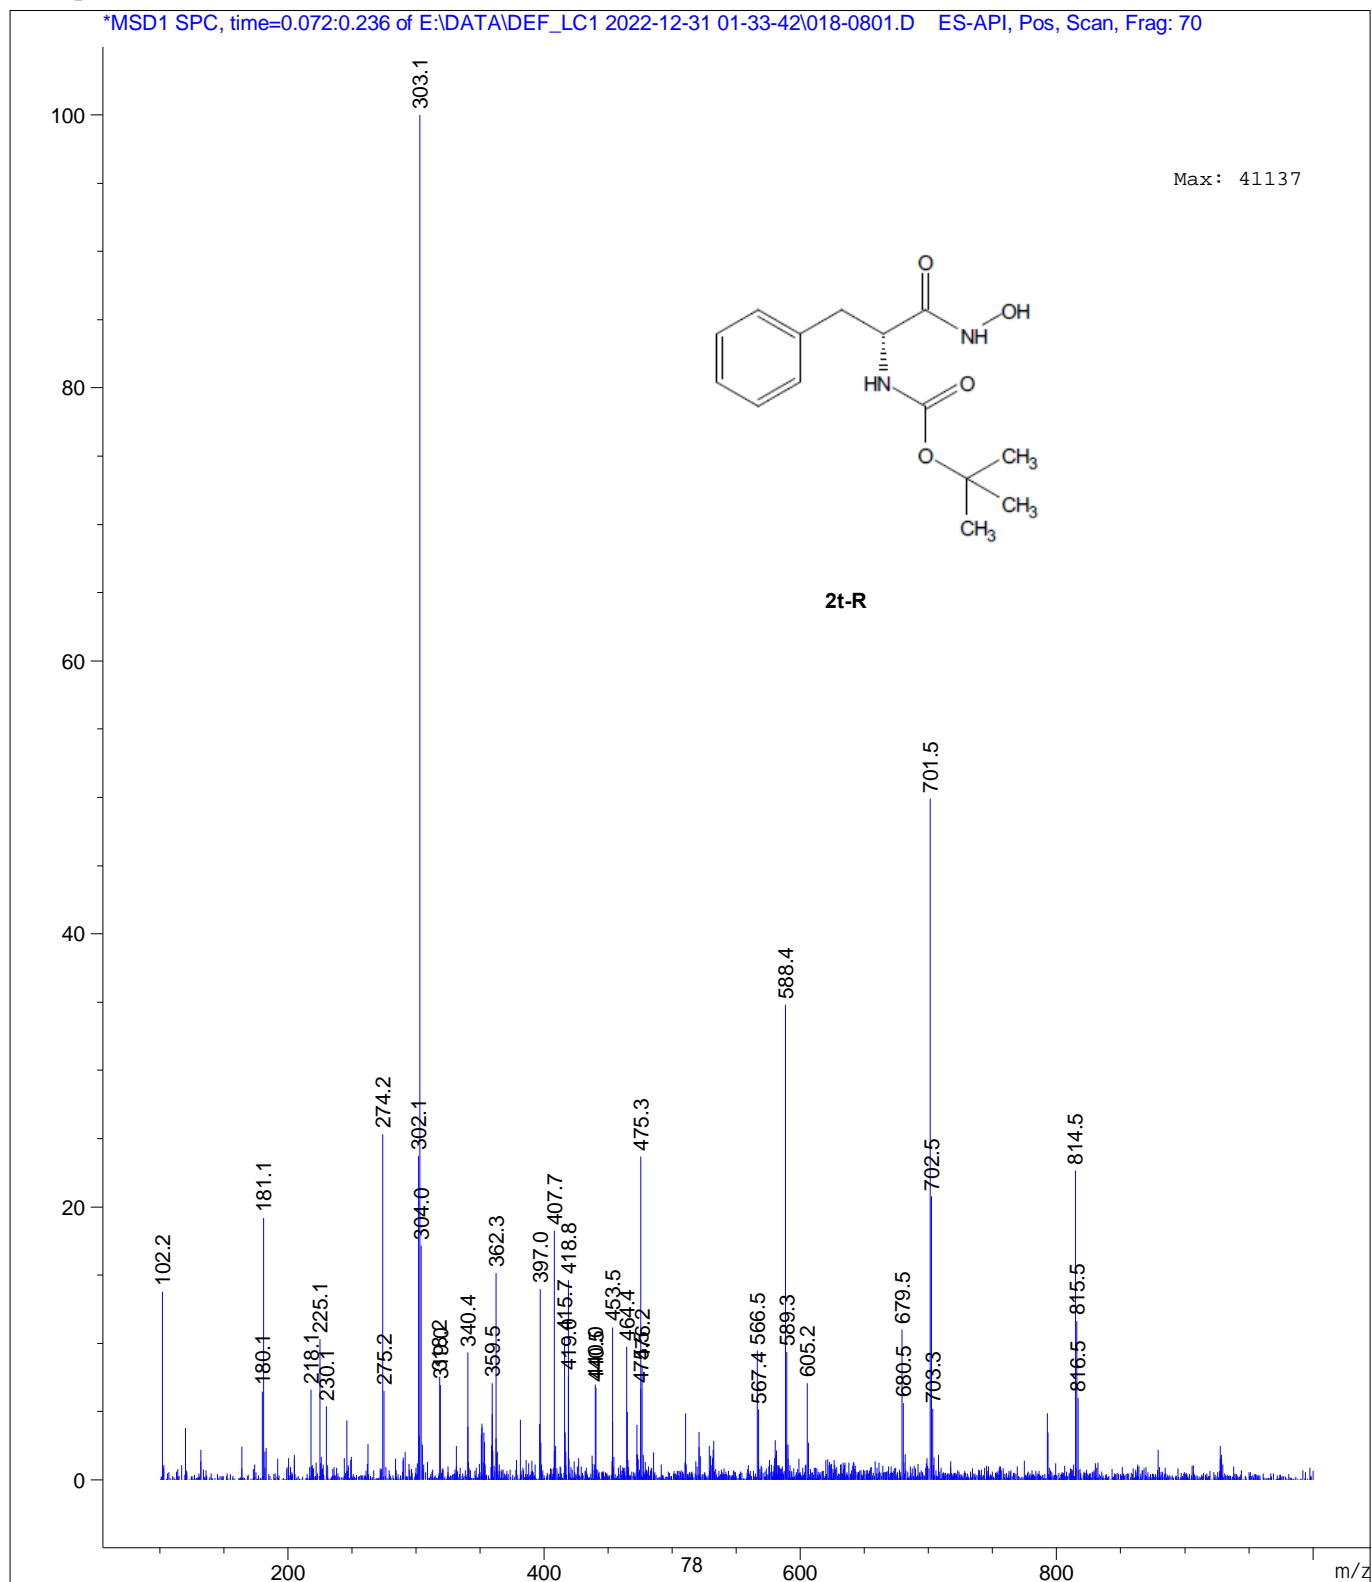

Supplement: d3gc00485f1.pdf [file d3gc00485f1.pdf]
